# Supplementary material for: Protocol for a national prevalence study of advance care planning documentation and self-reported uptake in Australia
Source: PubMed Central journal article supplement — BMJ Open. 2017 Nov 3;7(11):e018024. doi: 10.1136/bmjopen-2017-018024 (PMC5695482; doi:10.1136/bmjopen-2017-018024), 2017-11-03
Supplement: bmjopen-2017-018024.draft_revisions.pdf [file bmjopen-2017-018024.draft_revisions.pdf]

# BMJ Open

BMJ Open is committed to open peer review. As part of this commitment we make the peer review history of every article we publish publicly available.

When an article is published we post the peer reviewers' comments and the authors' responses online. We also post the versions of the paper that were used during peer review. These are the versions that the peer review comments apply to.

The versions of the paper that follow are the versions that were submitted during the peer review process. They are not the versions of record or the final published versions. They should not be cited or distributed as the published version of this manuscript.

BMJ Open is an open access journal and the full, final, typeset and author-corrected version of record of the manuscript is available on our site with no access controls, subscription charges or pay-per-view fees (<http://bmjopen.bmj.com>).

If you have any questions on BMJ Open's open peer review process please email [editorial.bmjopen@bmj.com](mailto:editorial.bmjopen@bmj.com)

# BMJ Open

## Protocol for a national prevalence study of advance care planning documentation and self-reported uptake in Australia

|                                 |                                                                                                                                                                                                                                                                                                                                                                                                                                                                                                                                                                                                                                                                                                        |
|---------------------------------|--------------------------------------------------------------------------------------------------------------------------------------------------------------------------------------------------------------------------------------------------------------------------------------------------------------------------------------------------------------------------------------------------------------------------------------------------------------------------------------------------------------------------------------------------------------------------------------------------------------------------------------------------------------------------------------------------------|
| Journal:                        | <i>BMJ Open</i>                                                                                                                                                                                                                                                                                                                                                                                                                                                                                                                                                                                                                                                                                        |
| Manuscript ID                   | bmjopen-2017-018024                                                                                                                                                                                                                                                                                                                                                                                                                                                                                                                                                                                                                                                                                    |
| Article Type:                   | Protocol                                                                                                                                                                                                                                                                                                                                                                                                                                                                                                                                                                                                                                                                                               |
| Date Submitted by the Author:   | 01-Jun-2017                                                                                                                                                                                                                                                                                                                                                                                                                                                                                                                                                                                                                                                                                            |
| Complete List of Authors:       | Ruseckaite, Rasa; Monash University, Epidemiology and Preventive Medicine<br>Detering, Karen; Austin Health, Advance care planning Program; University of Melbourne, Faculty of Medicine, Dentistry and Health Science<br>Evans, Sue; Department of Epidemiology and Preventive Me, Monash University<br>Perera, Veronika; Austin Health, Advance Care Planning Australia<br>Walker, Lynne; Austin Health, Advance Care Planning Australia<br>Sinclair, Craig; University of Western Australia, Rural Clinical School of Western Australia<br>Clayton, Josephine; Greenwich Hospital, HammondCare Palliative and Supportive Care Service<br>Nolte, Linda; Austin Health, Advance care planning Program |
| <b>Primary Subject Heading</b>: | Health services research                                                                                                                                                                                                                                                                                                                                                                                                                                                                                                                                                                                                                                                                               |
| Secondary Subject Heading:      | Epidemiology, General practice / Family practice, Palliative care, Patient-centred medicine                                                                                                                                                                                                                                                                                                                                                                                                                                                                                                                                                                                                            |
| Keywords:                       | advance care planning, prevalence, AUDIT, general practice, residential aged care, hospital                                                                                                                                                                                                                                                                                                                                                                                                                                                                                                                                                                                                            |
|                                 |                                                                                                                                                                                                                                                                                                                                                                                                                                                                                                                                                                                                                                                                                                        |

SCHOLARONE™  
Manuscripts

1  
2  
3  
4  
5  
6  
7  
8  
9  
10  
11  
12  
13  
14  
15  
16  
17  
18  
19  
20  
21  
22  
23  
24  
25  
26  
27  
28  
29  
30  
31  
32  
33  
34  
35  
36  
37  
38  
39  
40  
41  
42  
43  
44  
45  
46  
47  
48  
49  
50  
51  
52  
53  
54  
55  
56  
57  
58  
59  
60

1 **Title:** Protocol for a national prevalence study of advance care planning documentation and  
2 self-reported uptake in Australia

3 **Corresponding author:**

4 Rasa Ruseckaite

5 Department of Epidemiology and Preventive Medicine

6 School of Public Health and Preventive Medicine, Monash University

7 553 St Kilda Rd, Melbourne, Victoria, Australia 3004

8 Email: [rasa.ruseckaite@monash.edu](mailto:rasa.ruseckaite@monash.edu)

9 Telephone: +61 3 9903 0437

10

11 **Authors:**

12 *Karen Detering*, Advance Care Planning Australia, Austin Health, Melbourne, Victoria,  
13 Australia; Faculty of Medicine, Dentistry and Health Sciences, Melbourne University,  
14 Melbourne, Victoria, Australia

15

16 *Sue Evans*, Department of Epidemiology and Preventive Medicine, School of Public Health  
17 and Preventive Medicine, Monash University, Melbourne, Victoria, Australia

18

19 *Veronica Perera*, Advance Care Planning Australia, Austin Health, Melbourne, Victoria,  
20 Australia

21

22 *Lynne Walker*, Advance Care Planning Australia, Austin Health, Melbourne, Victoria,  
23 Australia

1  
2  
3 24 *Craig Sinclair*, Rural Clinical School of Western Australia, University of Western Australia,  
4  
5 25 Albany, Western Australia, Australia  
6

7  
8  
9 26

10 27 *Josephine Clayton*, Hammond Care Palliative & Supportive Care Service, Greenwich  
11  
12 28 Hospital, Sydney, New South Wales, Australia; Australia and Sydney Medical School, The  
13  
14 29 University of Sydney, Sydney, New South Wales, Australia  
15

16  
17  
18  
19 30

20 31 *Linda Nolte*, Advance Care Planning Australia, Austin Health, Melbourne, VIC, Australia  
21

22  
23  
24 32

25  
26 33 **Word count:** text 2,906; abstract 299  
27  
28  
29  
30  
31  
32  
33  
34  
35  
36  
37  
38  
39  
40  
41  
42  
43  
44  
45  
46  
47  
48  
49  
50  
51  
52  
53  
54  
55  
56  
57  
58  
59  
60

1  
2  
3  
4  
5  
6  
7  
8  
9  
10  
11  
12  
13  
14  
15  
16  
17  
18  
19  
20  
21  
22  
23  
24  
25  
26  
27

34 **ABSTRACT**

35 **Introduction:** Advance care planning (ACP) is a process between a person, their  
36 family/carer(s) and healthcare providers that supports adults at any age or stage of health in  
37 understanding and sharing their personal values, life goals, and preferences regarding future  
38 medical care. The Australian government funds a number of national initiatives aimed at  
39 increasing ACP uptake, however there is currently no standardised Australian data regarding  
40 formal ACP documentation or self-reported uptake. This makes it difficult to evaluate the  
41 impact of ACP initiatives. This study aims to determine the Australian national prevalence of  
42 ACP and completion of Advance Care Directives (ACDs) in hospitals, aged care facilities  
43 and general practices. It will also explore people's self-reported use of ACP, and views about  
44 the process.

45 **Methods and analysis:** Researchers will conduct a national multicentre cross-sectional  
46 prevalence study, consisting of a record audit and surveys of people over 65 years in three  
47 sectors. Fifty records from 48 participating Australian organisations will be audited (total of  
48 2400 records). People whose records were audited, who speak English and have a decision-  
49 making capacity will also be invited to complete a survey. The primary outcome measure will  
50 be the number of people who have formal (ACD) or informal ACP documentation that can be  
51 located in records within 15 minutes. Other outcomes will include demographics, measure of  
52 illness and functional capacity, details of ACP documentation (including type of document),  
53 location of documentation in the person's records and whether current clinical care plans are  
54 consistent with ACP documentation. People will be surveyed, to measure self-reported  
55 interest, uptake and use of ACP/ACDs, and self-reported quality of life.

56 **Ethics and dissemination:** This protocol has been approved by the Austin Health Human  
57 Research Ethics Committee (reference HREC/17/Austin/83). Results will be submitted to  
58 international peer-reviewed journals and presented at international conferences.

1  
2  
3  
4  
5  
6  
7  
8  
9  
10  
11  
12  
13  
14  
15  
16  
17  
18  
19  
20  
21  
22  
23  
24  
25  
26  
27  
28  
29  
30  
31  
32  
33  
34  
35  
36  
37  
38  
39  
40  
41  
42  
43  
44  
45  
46  
47  
48  
49  
50  
51  
52  
53  
54  
55  
56  
57  
58  
59  
60  
61  
62  
63  
64  
65  
66  
67  
68  
69  
70  
71

59 **Trial registration:** ACTRN12617000743369

60 **Strengths and limitations of this study**

- 61 • This is the first national multicentre cross-sectional prevalence study consisting of  
62 records audit and surveys of persons >65 years aiming to determine the prevalence of  
63 advance care planning documentation in Australian hospitals, residential aged care  
64 facilities and general practices.
- 65 • The results of this study will inform future steps toward improved advance care  
66 planning data collection methodology, advance care planning implementation  
67 strategies and evaluation processes.
- 68 • This pilot study is principally aimed at establishing feasibility, and may lack statistical  
69 power to determine the actual prevalence of advance care planning documentation in  
70 Australia.

1  
2  
3  
4  
5  
6  
7  
8  
9  
10  
11  
12  
13  
14  
15  
16  
17  
18  
19  
20  
21  
22  
23  
24  
25  
26  
27  
28  
29  
30  
31  
32  
33  
34  
35  
36  
37  
38  
39  
40  
41  
42  
43  
44  
45  
46  
47  
48  
49  
50  
51  
52  
53  
54  
55  
56  
57  
58  
59  
60

72 **INTRODUCTION**

73 **Background**

74 Advance care planning (ACP) is a process between a person, their family/carer(s) and  
75 healthcare providers that supports adults at any age or stage of health in understanding and  
76 sharing their personal values, life goals, and preferences regarding future medical care (1, 2).

77 ACP is an ongoing process wherein people have the opportunity to discuss and plan for  
78 future decision-making, particularly for a time when they may not be able to make decisions  
79 for themselves. The ultimate goal of ACP is to align the care the person actually receives  
80 with their preferences. In order for this to occur, ACP information needs to be accessible  
81 when required, and treatment plans need to be developed in accordance with the person's  
82 values, goals, beliefs and specific preferences (3).

83 A person may choose to document their preferences for care in formal or informal documents.

84 An Advance Care Directive (ACD) is a type of formal document, recognised by common law  
85 or specific legislation that is completed and signed by a competent adult. It can record the  
86 person's preferences for future care, and appoint a substitute decision-maker to make  
87 decisions about health care and personal life management (2). Documentation of a person's  
88 preferences helps family members and services make informed decisions about care when a  
89 person is unable to express their choices. Missing, ambiguous or inaccurate documentation  
90 can mean that preferences discussed or outlined in plans may not be followed. While ACP  
91 documents are used in all Australian states and territories, they take different forms, have  
92 different names and, while recognised under common law, many are also prescribed by  
93 legislation (4). Examples of formal ACP documentation could include a written appointment  
94 of one or more substitute decision-makers, or completion of ACDs specifying instructions for  
95 future treatments (5). Informal approaches to ACP documentation are also used, including  
96 non-statutory forms, personally written letters, a plan outlining the person's values, beliefs,

1  
2 97 and specific goals for care, or notes in a record by a professional outlining the person's  
3  
4 98 preferences. In some cases this statutory and non-statutory documentation may be completed  
5  
6 99 by a person's substitute decision-maker, however such plans may not have the same legal  
7  
8  
9 100 weighting as statutory documentation in some circumstances.

10  
11 101 Australia's population is ageing and the incidence of chronic and complex healthcare  
12  
13 102 conditions will rise accordingly. It is important to maintain an approach that meets personal  
14  
15 103 preferences for quality and end-of-life care as care needs change over time (6). Numerous  
16  
17 104 Australian and international studies have been conducted to understand issues related to end-  
18  
19 105 of-life care and how ACP may influence the care that people receive (7-12). These studies  
20  
21 106 have been conducted in a range of sectors, including hospitals, residential aged care facilities,  
22  
23 107 general practices and the community. Various research methodologies have been used to  
24  
25 108 understand ACP prevalence, including audits of health records; interviews; and surveys of  
26  
27 109 service providers, service users and families (13-21).

28  
29 110 The lack of standardised, national data relating to ACP prevalence in Australia means that  
30  
31 111 there is a lack of evidence to assist organisations and government to understand the impact of  
32  
33 112 ACP initiatives. A search of literature between 2010 and 2016 has identified that the largest  
34  
35 113 international sample size in a prevalence study assessing ACP practice was undertaken in  
36  
37 114 2015 in the USA with the sample of 24,291 people over five years. It found ACP prevalence  
38  
39 115 of 12.7% (22). A large Australian sample size (2,764 people) in a prevalence study was  
40  
41 116 described by Nair (17) in 2000 in the Hunter region of New South Wales, with very low  
42  
43 117 levels (0.2%) of formal ACDs found. Another study of 3,055 participants in South Australia  
44  
45 118 found that nearly half of the study participants had not completed any ACD (20). The first  
46  
47 119 attempt to conduct a national prevalence study in Australia was made by White et al (21).  
48  
49 120 This self-report study included 2,405 community participants across all jurisdictions of whom  
50  
51 121 only 14% had their ACDs completed.  
52  
53  
54  
55  
56  
57  
58  
59  
60



1  
2 122 The majority of the Australian studies were self-reports, limited to single-settings and did not  
3  
4 123 examine patterns of ACP across multiple sectors and jurisdictions. There is a gap in evidence  
5  
6 124 regarding ACP documentation and self-reported uptake nationally. This research undertaken  
7  
8  
9 125 by Advance Care Planning Australia in partnership with Monash University, will be the first  
10  
11 126 study to undertake a coordinated assessment of the national prevalence of ACP uptake, and  
12  
13 127 documentation in hospitals, residential aged care facilities and general practices using a  
14  
15 128 standardised approach to data collection. The results will inform future steps toward  
16  
17 129 improved ACP data collection methodology, ACP implementation strategies and evaluation  
18  
19 130 processes. We anticipate that the results from this study will act as a baseline for future  
20  
21 131 national ACP prevalence studies.  
22  
23

### 24 25 132 **Aims and hypotheses** 26 27

28 133 The specific aims of this study are to: 1) determine the prevalence and accessibility of ACP  
29  
30 134 documentation in paper and/or electronic health records of people over the age of 65 in  
31  
32 135 hospitals, residential aged care facilities and general practices, 2) assess the quality, validity  
33  
34 136 and variation of the ACP documentation across different sectors and jurisdictions, 3) explore  
35  
36 137 peoples' views on ACP, and self-reported ACP uptake; and 4) explore whether clinical care  
37  
38 138 plans and medical orders developed for the person are consistent with their documented  
39  
40 139 preferences for care.  
41  
42  
43

44 140 We hypothesise that the prevalence of ACP documentation will be low and consistent with  
45  
46 141 that identified by White et al (21), and that more people will have an ACD appointing a  
47  
48 142 substitute decision-maker than an ACD (or similar document) outlining their preferences for  
49  
50 143 care. In addition, we hypothesise that there will be discrepancies between peoples' self-  
51  
52 144 reported completion of ACP documentation, and their presence in the audited records.  
53  
54

### 55 56 145 **Outcomes** 57 58 59 60

1  
2  
3 146 The primary outcome of this study will be ACP prevalence, and this is measured by the  
4  
5 147 number of people who have ACP documentation that can be located in their records within  
6  
7 148 15 minutes. Secondary outcomes include the type, quality and validity of ACP documentation,  
8  
9 149 peoples' self-reported views on ACP and ACP uptake, and consistency between ACP  
10  
11 150 documentation and clinical care plans and medical orders.  
12

## 13 14 151 **METHODS AND ANALYSIS**

### 15 16 17 152 **Study design and population**

18  
19  
20 153 This national multicentre cross-sectional prevalence pilot study consists of two parts: 1) an  
21  
22 154 audit of a person's records and 2) a survey of those people whose files were audited. It will  
23  
24 155 be conducted among people admitted to hospital, attending general practices, or residing at  
25  
26 156 residential aged care facilities in Australia. This pilot study will trial methodology and data  
27  
28 157 collection tools for national ACP prevalence studies.  
29  
30  
31 158 Fifty records will be audited in each of 48 Australian organisations (expected sample of 2400  
32  
33 159 records). Participating organisations will be recruited through an expressions of interest  
34  
35 160 process. It is expected that 48 organisations (two hospitals, two residential aged care facilities  
36  
37 161 and two general practices) in each of the eight Australian jurisdictions will participate in this  
38  
39 162 study. Expression of interest applications will be assessed on each organisation's  
40  
41 163 commitment to the project deliverables and ability to audit the required 50 records (Table 1).  
42  
43  
44

45  
46 164 *[Table 1 here please]*  
47

48  
49 165 Successful organisations will receive funding to cover staff costs required to participate in the  
50  
51 166 study. Data collectors will receive a training manual with jurisdictional specific information,  
52  
53 167 and will undertake training (two webinar sessions of 90 minutes duration conducted over two  
54  
55 168 weeks) on conducting the record audit and surveys. A couple of sample health records will be  
56  
57  
58  
59  
60

1  
2 169 provided for the extraction of the data prior the study to ensure the concordance amongst the  
3  
4 170 data collectors.  
5  
6

7 171 Each organisation will use their information management system or database to provide the  
8  
9 172 research team with a list of patient/client records that meet eligibility criteria. The study  
10  
11 173 sample will comprise people over the age of 65 admitted to hospitals, residential aged care  
12  
13 174 facilities or visiting general practice. Inclusion and exclusion criteria for Part 1 (audit) and 2  
14  
15 175 (survey) are listed in Table 2.  
16  
17

18  
19 176 *[Table 2 here please]*  
20  
21

## 22 177 **Part 1. Records audit**

### 23 24 25 178 *Recruitment*

26  
27  
28 179 At hospitals and residential aged care facilities data collector/(s) will contact the  
29  
30 180 organisation's Health Information Management team (or similar) to obtain a list of current  
31  
32 181 inpatients or residential clients who meet the study eligibility criteria (Table 2). The list will  
33  
34 182 only contain the person's unique record number. All other identifiable details will be  
35  
36 183 removed.  
37  
38

### 39 184 *Randomization*

40  
41  
42 185 Each hospital and residential aged care facility will transmit their eligible inpatient/client list  
43  
44 186 through a secure file transfer protocol to Monash University where a random number  
45  
46 187 generator will select 50 records in each centre for review.  
47  
48

49  
50 188 Following simple randomization procedures each record number will be randomly assigned  
51  
52 189 to two groups: group one ("to include to the audit") or group two ("not to include to the  
53  
54 190 audit"). The "Research Randomizer" ([www.randomizer.org](http://www.randomizer.org)) software solution will be used to  
55  
56 191 undertake this task. The research team will provide data collectors with a list containing  
57  
58 192 record numbers of the 50 people assigned to group. Data collectors will start auditing once  
59  
60

1  
2 193 they receive audit and supplementary lists. In the situation when a person's paper or  
3  
4 194 electronic record cannot be located, this will be noted, and additional record numbers will be  
5  
6 195 drawn.  
7  
8

9  
10 196 For practicality purposes random sampling will not be performed in general practices.  
11  
12 197 Records of the first 50 eligible people visiting the practice on the specified day/(s) and  
13  
14 198 meeting the selection criteria will be included in the audit.  
15

#### 16 17 199 *Data collection*

18  
19  
20 200 Data collectors will obtain selected paper and/or electronic records. Data collection will be  
21  
22 201 carried out using either a paper-based or electronic data collection tool specifically designed  
23  
24 202 for this study (Supplementary Table 1). Although advance care plans and ACDs are used in  
25  
26 203 all Australian jurisdictions, the terminology, format, documentation requirements, how the  
27  
28 204 ACD applies and the hierarchy of decision-makers differ from state to state (4, 23, 24). Data  
29  
30 205 collectors will be given training material with information, terminology and definitions  
31  
32 206 relevant to their jurisdictions.  
33

34  
35  
36 207 Data collectors will attempt to locate ACP documentation within 15 minutes, and if the ACP  
37  
38 208 documentation is not found, they will stop searching for ACP documentation and move on to  
39  
40 209 answering other audit items, such as demographic information. It is anticipated that the total  
41  
42 210 time for the audit will take between 30 and 45 minutes to extract data from each record.  
43  
44

#### 45 211 *Data de-identification*

46  
47  
48 212 A study number will be assigned to each person on the audit list. This study number will be  
49  
50 213 entered onto the data collection form. Identifiable information such as name, or date of birth  
51  
52 214 will not be recorded. Data collectors will generate a separate list containing the study number  
53  
54 215 and person's name. This list will be used to identify potential participants for the second  
55  
56  
57  
58  
59  
60

1  
2 216 component of the study (the survey). The list with identifying information will remain at the  
3  
4 217 participating organisation and will not be disclosed to the research team.  
5  
6

7 218 **Part 2. The survey**  
8

9  
10 219 The survey will be undertaken to explore the person's understanding and experience of ACP  
11  
12 220 and identify their preferences for care.  
13

14  
15 221 *Recruitment*  
16

17  
18 222 People from participating organisations whose files have been audited are suitable for  
19  
20 223 inclusion in Part 2 of this project, providing they meet the eligibility criteria outlined in Table  
21  
22 224 2.  
23

24  
25 225 *Informed consent*  
26

27  
28 226 Data collectors will explain the study and provide participants with the Explanatory  
29  
30 227 Statement and Consent Form. The person's capacity to give consent will be judged on the  
31  
32 228 day/(s) of the study by a nurse or other clinician in hospitals/residential aged care facilities, or  
33  
34 229 by a nurse/doctor/other clinician in general practice, based on established principles of  
35  
36 230 informed consent (25).  
37

38  
39  
40 231 *Data collection*  
41

42  
43 232 Those who consent will be provided with a paper or electronic survey presented on a tablet or  
44  
45 233 laptop (Supplementary Table 2). Participants can complete this survey themselves, or ask for  
46  
47 234 help from the data collector. It is anticipated that a person will take between 20 and 30  
48  
49 235 minutes to complete the survey. If participants complete a paper-based survey, data collectors  
50  
51 236 will enter the data electronically at a later time.  
52

53  
54  
55 237 *Data de-identification*  
56  
57  
58  
59  
60

1  
2 238 Identifiable information will not be collected. Each participant will be assigned a study  
3  
4 239 number which will be entered and stored electronically. This will be the same number which  
5  
6 240 was generated during the record audit.  
7  
8

9  
10 241 **Variables**

11  
12 242 The list of variables to be collected during the study is detailed in Table 3.  
13

14  
15 243 *[Table 3 here please]*  
16

17  
18 244 *Part 1. Records audit*  
19

20  
21 245 Data extracted from the person's record will include: 1) demographic characteristics, 2)  
22  
23 246 clinical information, 3) information on the ACP documentation, 4) person's preferences  
24  
25 247 regarding their care, and 5) medically driven orders.  
26  
27

28 248 *Part 2. The survey*  
29

30  
31 249 The following information will be collected during the surveys: 1) demographic  
32  
33 250 characteristics, 2) generic quality of life and health status using EQ-5D five dimensions  
34  
35 251 questionnaire (chosen because it has been extensively validated and shown to be sensitive,  
36  
37 252 internally consistent, and reliable (26)), 3) knowledge and experience regarding ACP, and 4)  
38  
39 253 self-reported use of ACP documentation (i.e. participants will be asked whether they have  
40  
41 254 documented their values and beliefs or preferences for future care, how this documentation is  
42  
43 255 stored, and whether they have legally appointed a substitute decision-maker).  
44  
45  
46

47 256 **Population size**  
48

49  
50 257 While a sample size justification is important for pilot and feasibility trials, a formal sample  
51  
52 258 size calculation may not be appropriate (27). Based on assumptions and findings from  
53  
54 259 previous research, we have chosen a sample 50 people from each organisation, with an  
55  
56 260 expected total sample size of 2400 records (28). This will yield a comparison of data from  
57  
58  
59  
60

1  
2 261 800 people's records according to sector. Estimated precision and confidence intervals of the  
3  
4 262 chosen sample are shown in Table 4.  
5  
6

7 263 *[Table 4 here please]*  
8  
9

## 10 264 **Data processing**

### 11 12 265 *Data management*

13  
14  
15  
16 266 All data collected during this study will be stored on a cloud-based database specifically  
17  
18 267 designed for this project. Cloud-based storage will ensure customized data security control  
19  
20 268 for each organization and is suitable for distributed collection environments. The database  
21  
22 269 will have in-built validation and range checks to reduce data collection errors.  
23  
24

25  
26 270 Participants and research staff may access the web-based record audit tool and survey on a  
27  
28 271 personal computer, laptop or tablet. Organisations will need internet access in order to access  
29  
30 272 the cloud-based database and data collection forms. The research team will also make paper-  
31  
32 273 based forms available for people (organisations and those completing the survey) who have  
33  
34 274 limited computer access, or are not comfortable with using digital technologies.  
35  
36

### 37 275 *Statistical analysis*

38  
39  
40 276 Descriptive statistics will be calculated for the total sample of the study and will be stratified  
41  
42 277 by major grouping variables: organisation type, state, location, age, sex, ethnicity, diagnosis,  
43  
44 278 functional status and outcomes.  
45  
46

47 279 Data collectors will judge ACP documentation to be present if they find evidence of any ACP  
48  
49 280 documentation of the person's preferences (either formal or informal), or legal appointment  
50  
51 281 of a substitute decision-maker by the person. Presence of ACP documentation, such as ACDs  
52  
53 282 and advance care plans will be described using the mode, frequency, and distribution of the  
54  
55 283 respective categories. Comparisons will be made using *t-tests* for the continuous type  
56  
57 284 variables and *chi-square* contingency table analysis for the categorical type variables.  
58  
59  
60

1  
2 285 Data collectors will also look for other evidence of ACP discussions, such as a note in the  
3  
4 286 person's record, validity of the document, recording on a limitation of treatment form which  
5  
6 287 clearly states the decision is based on the person's preferences, or other documentation of a  
7  
8 288 person's preferences, but where a statutory or non-statutory ACD has not been completed.  
9  
10 289 These will be reported as descriptive data.  
11  
12

13  
14 290 Multivariate logistic regression will be performed, predicting the presence of ACP  
15  
16 291 documentation while controlling for the type of organisation, jurisdictions, location, age, sex  
17  
18 292 and ethnicity. In instances where data are missing, analysis will be performed using list-wise  
19  
20 293 deletion. The level of significance will be set at 0.05.  
21  
22

#### 23 294 **Project governance**

25  
26 295 The ACP prevalence study will be overseen by a project Advisory Group. This group will  
27  
28 296 meet every three months for the initial 12-month period. Members of the Advisory Group  
29  
30 297 will include representatives from Advance Care Planning Australia, Monash University,  
31  
32 298 Australian Institute of Health and Welfare, jurisdictions, and members of the hospital, aged  
33  
34 299 care and general practice sectors. The Advisory Group will be responsible for reviewing and  
35  
36 300 endorsing the project methodology, advertising the expression of interest to the settings,  
37  
38 301 advising on barriers or enablers to conducting this research within their relevant sector and/or  
39  
40 302 jurisdictions including risk management; and reviewing prevalence study findings and reports.  
41  
42  
43

#### 44 303 **ETHICS AND DISSEMINATION**

45  
46  
47 304 This research protocol for this study has been approved by Austin Health Human Research  
48  
49 305 Ethics Committee (reference number: HREC/17/Austin/83).  
50  
51

52  
53 306 Results of this study will be provided to the participating organisations and the Australian  
54  
55 307 Government. No reports will identify any specific organisation but jurisdictional comparisons  
56  
57 308 will be possible. Findings will be presented at relevant conferences and published in peer-  
58  
59  
60



1  
2 309 reviewed journals, on the Advance Care Planning Australia website and in lay and social  
3  
4 310 media where appropriate. The investigators will review drafts of the manuscripts, abstracts,  
5  
6 311 press releases and any other publications arising from the study. Authorship will be  
7  
8 312 determined in accordance with the International Committee of Medical Journal Editors  
9  
10 313 guidelines, and other contributors will be acknowledged.  
11  
12  
13

#### 14 **Supplementary documents**

15  
16  
17 315 1. Supplementary Table 1 – Records audit tool

18  
19  
20 316 2. Supplementary Table 2 – Survey

#### 21 22 317 **Funding**

23  
24  
25 318 This program is supported by funding from the Australian Government as a part of a  
26  
27 319 Specialist Palliative Care and Advance Care Planning Advisory Service Program.  
28  
29

#### 30 320 **Authors' contributions**

31  
32  
33 321 RR acted as a principal investigator and contributed to the concept, drafting, design and  
34  
35 322 revising of the protocol. KD contributed to the concept, drafting, design and critically  
36  
37 323 revising of the protocol. SE contributed to the design and critically revising the protocol. VP  
38  
39 324 contributed to the design and critically revising the protocol. CS contributed to the concept,  
40  
41 325 design and critically revising the protocol. JC contributed to the concept and design of the  
42  
43 326 protocol. LN conceived the study and contributed to the concept and critically revising of the  
44  
45 327 protocol.  
46  
47  
48

#### 49 328 **Competing interests**

50  
51  
52 329 None  
53  
54

55 330  
56  
57  
58  
59  
60

331 **REFERENCES**

- 332 1. Sudore RL, Lum HD, You JJ, Hanson LC, Meier DE, Pantilat SZ, et al. Defining  
333 Advance Care Planning for Adults: A Consensus Definition from a Multidisciplinary Delphi  
334 Panel. *Journal of pain and symptom management*. 2017.
- 335 2. The Australian Commission of Quality and Safety in Health Care. The National  
336 Consensus Statement: Essential elements for safe and high-quality end-of-life care [cited  
337 2016 (accessed Nov 2016)].
- 338 3. Detering K. Accessibility of Advance Care Plans in Victoria – A Summary Options  
339 Paper. Melbourne: Advance Care Planning Australia, 2017.
- 340 4. Carter RZ, Detering KM, Silvester W, Sutton E. Advance care planning in Australia:  
341 what does the law say? *Australian health review : a publication of the Australian Hospital  
342 Association*. 2016.
- 343 5. Australian Health Ministers' Advisory Council. Clinical, Technical and Ethical  
344 Principal Committee (issuing body). A national framework for advance care directives.  
345 Canberra Australian Health Ministers' Advisory Council, 2011.
- 346 6. Victorian Government. Advance care planning: have the conversation. A strategy for  
347 Victorian health services 2014-2018. State of Victoria, Department of Health 2014.
- 348 7. Ashby MA, Thornton RN, Thomas RL. Advance care planning: lessons from a study  
349 of Tasmanian enduring guardianship forms. *The Medical journal of Australia*.  
350 2013;198(4):188-9.
- 351 8. Bischoff KE, Sudore R, Miao Y, Boscardin WJ, Smith AK. Advance care planning  
352 and the quality of end-of-life care in older adults. *Journal of the American Geriatrics Society*.  
353 2013;61(2):209-14.
- 354 9. Brunner-La Rocca HP, Rickenbacher P, Muzzarelli S, Schindler R, Maeder MT, Jeker  
355 U, et al. End-of-life preferences of elderly patients with chronic heart failure. *European Heart  
356 Journal*. 2012;33(6):752-9.

- 1  
2 357 10. Carr D. "I don't want to die like that ...": the impact of significant others' death quality  
3  
4 358 on advance care planning. *The Gerontologist*. 2012;52(6):770-81.  
5  
6 359 11. Laakkonen ML, Pitkala KH, Strandberg TE, Berglind S, Tilvis RS. Living will,  
7  
8 360 resuscitation preferences, and attitudes towards life in an aged population. *Gerontology*.  
9  
10 361 2004;50(4):247-54.  
11  
12 362 12. Volker DL, Divin-Cosgrove C, Harrison T. Advance directives, control, and quality  
13  
14 363 of life for persons with disabilities. *Journal of palliative medicine*. 2013;16(8):971-4.  
15  
16 364 13. Bezzina AJ. Prevalence of advance care directives in aged care facilities of the  
17  
18 365 Northern Illawarra. *Emergency medicine Australasia : EMA*. 2009;21(5):379-85.  
19  
20 366 14. Cheang F, Finnegan T, Stewart C, Hession A, Clayton JM. Single-centre cross-  
21  
22 367 sectional analysis of advance care planning among elderly inpatients. *Internal medicine*  
23  
24 368 *journal*. 2014;44(10):967-74.  
25  
26 369 15. Kirkpatrick JN, Guger CJ, Arnsdorf MF, Fedson SE. Advance directives in the  
27  
28 370 cardiac care unit. *American Heart Journal*. 2007;154(3):477-81.  
29  
30 371 16. Milnes S, Orford NR, Berkeley L, Lambert N, Simpson N, Elderkin T, et al. A  
31  
32 372 prospective observational study of prevalence and outcomes of patients with Gold Standard  
33  
34 373 Framework criteria in a tertiary regional Australian Hospital. *BMJ supportive & palliative*  
35  
36 374 *care*. 2015.  
37  
38 375 17. Nair B, Kerridge I, Dobson A, McPhee J, Saul P. Advance care planning in residential  
39  
40 376 care. *Australian and New Zealand journal of medicine*. 2000;30(3):339-43.  
41  
42 377 18. Street M, Ottmann G, Johnstone MJ, Considine J, Livingston PM. Advance care  
43  
44 378 planning for older people in Australia presenting to the emergency department from the  
45  
46 379 community or residential aged care facilities. *Health & social care in the community*.  
47  
48 380 2015;23(5):513-22.  
49  
50 381 19. Wheatley E, Huntington MK. Advanced directives and code status documentation in  
51  
52 382 an academic practice. *Family medicine*. 2012;44(8):574-8.  
53  
54  
55  
56  
57  
58  
59  
60

- 1  
2  
3  
4  
5  
6  
7  
8  
9  
10  
11  
12  
13  
14  
15  
16  
17  
18  
19  
20  
21  
22  
23  
24  
25  
26  
27  
28  
29  
30  
31  
32  
33  
34  
35  
36  
37  
38  
39  
40  
41  
42  
43  
44  
45  
46  
47  
48  
49  
50  
51  
52  
53  
54  
55  
56  
57  
58  
59  
60
- 383 20. Bradley SL, Woodman RJ, Tieman JJ, Phillips PA. Use of advance directives by  
384 South Australians: results from the Health Omnibus Survey Spring 2012. *The Medical*  
385 *journal of Australia*. 2014;201(8):467-9.
- 386 21. White B, Tilse C, Wilson J, Rosenman L, Strub T, Feeney R, et al. Prevalence and  
387 predictors of advance directives in Australia. *Internal medicine journal*. 2014;44(10):975-80.
- 388 22. Butler J, Binney Z, Kalogeropoulos A, Owen M, Clevenger C, Gunter D, et al.  
389 Advance directives among hospitalized patients with heart failure. *JACC Heart failure*.  
390 2015;3(2):112-21.
- 391 23. Haysom G. Review of the National Registration and Accreditation Scheme for health  
392 practitioners. *Aus Health Law Bulletin*. 2015;23(1):12-5.
- 393 24. White B, Wilmott L, Trowse P, Parker M, Cartwright C. The legal role of medical  
394 professionals in decisions to withhold or withdraw life-sustaining treatment : Part 1 (New  
395 South Wales). *J Law Med*. 2011;18(3):498-522.
- 396 25. Australian Government. National Health and Medical Reserach Council. National  
397 Statement on Ethical Conduct in Human Research (2007) (Updated May 2015).  
398 <https://www.nhmrc.gov.au/book/national-statement-ethical-conduct-human-research>.
- 399 26. Rabin R, de Charro F. EQ-5D: a measure of health status from the EuroQoL Group.  
400 *Ann Med*. 2001;33:337-3423.
- 401 27. Billingham SA, Whitehead AL, Julious SA. An audit of sample sizes for pilot and  
402 feasibility trials being undertaken in the United Kingdom registered in the United Kingdom  
403 Clinical Research Network database. *BMC medical research methodology*. 2013;13:104.
- 404 28. Sim J, Lewis M. The size of a pilot study for a clinical trial should be calculated in  
405 relation to considerations of precision and efficiency. *Journal of clinical epidemiology*.  
406 2012;65(3):301-8.

407

408 **TABLES**409 **Table 1** Assessment criteria for organisations expressing their interest in the study

- Have the approval and endorsement of their executive team
- Be an accredited organisation according to the sector requirements
- Must have access to IT and devices for online data collection (i.e. computer, laptop or tablet)
- Must have Internet, e-mail and telephone access.
- Have a patient/client information management system with the ability to extract the list of all admissions of persons aged 65 years or more admitted to hospital or residential aged care facility for more than 48 hours at the time of the study
- Have the capacity to review a minimum of 30 files/records and administer a minimum of 30 surveys in the nominated time period.
- Have staff with the capacity to undertake up to three hours online training prior to study.
- Have appropriately skilled staff to assess a person's decision-making capacity.
- Have appropriately skilled staff who are available to answer questions about ACP.
- Have policies in place about privacy and confidentiality.
- Be willing to accept retrospective payment for involvement in this study.
- Be willing to sign a service agreement.
- Gain site specific approval within four to six weeks of notification of successful application.

410 *ACP – advance care planning; IT – information technology*

411

412

413 **Table 2** Overview of inclusion and exclusion criteria for the study participants

| <b>Inclusion criteria</b>                                                              |                                                     |
|----------------------------------------------------------------------------------------|-----------------------------------------------------|
| <b>Part 1. Records audit</b>                                                           | <b>Part 2. Survey</b>                               |
| Males and females                                                                      | Everybody included in Part 1                        |
| ≥65 years of age (≥55 years for ATSI people)                                           | English-speaking                                    |
| For hospitals and residential aged care facilities: admitted for >48 hours             | Able to consent                                     |
| For general practices: visiting general practice on the nominated day/(s) of the study |                                                     |
| <b>Exclusion criteria</b>                                                              |                                                     |
| <b>Part 1. Records audit</b>                                                           | <b>Part 2. Survey</b>                               |
| <65 years of age (<55 years for ATSI people)                                           | Non-English speaking                                |
| People admitted to the ICU                                                             | People who do not have decision-making capacity     |
| People in maternal/obstetric wards                                                     | People unable to or electing not to provide consent |
| People in mental health units                                                          | People expected to die within 24 hours              |
| For hospitals and residential aged care facilities: admitted for <48 hours             |                                                     |

414 *ATSI – Aboriginal and Torres Strait Islander peoples; ICU – intensive care unit*

Table 3 Data variables collected during the study

| Part 1. Records audit       |                               | Part 2. Survey              |                                                |
|-----------------------------|-------------------------------|-----------------------------|------------------------------------------------|
| Category                    | Variable                      | Category                    | Variable                                       |
| <b>Organisation</b>         |                               | <b>Demographics</b>         |                                                |
|                             | Name                          |                             | Age                                            |
|                             | Type                          |                             | Sex                                            |
|                             | State                         |                             | Country of birth                               |
|                             | Size                          |                             | Aboriginal status                              |
| <b>Demographics</b>         |                               |                             | Ethnicity                                      |
|                             | Age                           |                             | Religion                                       |
|                             | Sex                           |                             | Language spoken                                |
|                             | Postcode                      |                             | Relationship status                            |
|                             | Country of birth              |                             | Education                                      |
|                             | Aboriginal status             |                             | Level of support                               |
|                             | Ethnicity                     | <b>Health status/ EQ-5D</b> |                                                |
|                             | Religion                      |                             | Mobility                                       |
|                             | Language spoken               |                             | Usual activities                               |
|                             | Date of admission/visit       |                             | Self-care                                      |
|                             | Came from                     |                             | Pain-discomfort                                |
|                             | Medical condition             |                             | Anxiety/depression                             |
|                             | ECOG status                   | <b>Knowledge</b>            |                                                |
| <b>Documentation</b>        |                               |                             | Knowledge of ACP                               |
|                             |                               |                             | Previous discussions                           |
|                             |                               |                             | Barriers and enablers                          |
|                             |                               |                             | Personal preferences                           |
|                             | Ability to find in 15 minutes |                             | Readiness for ACP                              |
|                             | Date of the document          |                             | Future worries/wishes                          |
|                             |                               |                             | Legal appointment of substitute decision maker |
|                             | Time taken to find            | <b>Evidence</b>             |                                                |
|                             | Location of the document      |                             | Evidence of ACP documentation                  |
|                             | Name, type and other details  |                             |                                                |
| <b>Person's preferences</b> |                               |                             |                                                |

1  
2  
3 Life prolonging treatment type

4 Treatment to extend life

5 Comfort/palliative care

6 Other preferences

7 Place of care and/or death

8  
9  
10 **Medical orders**

11 Limitations of medical treatment

12 Palliative/comfort care

13 Other orders

14 Consistency with person's wishes

15  
16  
17 *ECOG - Eastern Cooperative Oncology Group*



**Table 4** Precision of positive predictive value of ACP/ACD documentation estimates

| ACDs (%) | Records at site<br>level (N) | 95% CI    | Records at<br>sector level (N) | 95% CI    |
|----------|------------------------------|-----------|--------------------------------|-----------|
| 0.95     | 50                           | 0.83-0.99 | 800                            | 0.93-0.96 |
| 0.9      | 50                           | 0.78-0.97 | 800                            | 0.87-0.92 |
| 0.8      | 50                           | 0.66-0.90 | 800                            | 0.77-0.83 |
| 0.7      | 50                           | 0.55-0.82 | 800                            | 0.67-0.73 |
| 0.6      | 50                           | 0.45-0.74 | 800                            | 0.56-0.63 |
| 0.5      | 50                           | 0.36-0.64 | 800                            | 0.46-0.54 |
| 0.4      | 50                           | 0.26-0.55 | 800                            | 0.37-0.43 |
| 0.3      | 50                           | 0.18-0.45 | 800                            | 0.27-0.33 |
| 0.2      | 50                           | 0.10-0.34 | 800                            | 0.17-0.23 |
| 0.1      | 50                           | 0.03-0.22 | 800                            | 0.08-0.12 |
| 0.05     | 50                           | 0.01-0.17 | 800                            | 0.04-0.07 |
| 0.02     | 50                           | 0.00-0.11 | 800                            | 0.00-0.03 |

*ACD – advance care direction; ACP – advance care planning*

**GENERIC HEALTH RECORD REVIEW FORM**

**Study ID number**

**Study site**

**Date form completed** \_\_\_/\_\_\_/\_\_\_ **Time started** \_\_\_\_\_ **Time completed** \_\_\_\_\_

**SECTION 1. TYPE AND PLACE OF DOCUMENTATION**

|                                                                                                                                                                 |                                                                                                                                                                                                                                                                                                                                                                                                                                                   |                                                      |
|-----------------------------------------------------------------------------------------------------------------------------------------------------------------|---------------------------------------------------------------------------------------------------------------------------------------------------------------------------------------------------------------------------------------------------------------------------------------------------------------------------------------------------------------------------------------------------------------------------------------------------|------------------------------------------------------|
| <p><b>1. Can you find any Advance Care Planning (ACP) documentation regarding health and personal care and preferred health outcomes within 15 minutes?</b></p> | <p><input type="checkbox"/> Yes (If YES, please complete the date of most recent documentation)<br/> <input type="checkbox"/> No (If NO, go to Section 2)</p>                                                                                                                                                                                                                                                                                     | <p>Date of most recent documentation ___/___/___</p> |
| <p><b>2. How long did it take you to find the ACP documentation?</b></p>                                                                                        | <p><input type="checkbox"/> Less than 5 minutes<br/> <input type="checkbox"/> 5-10 minutes<br/> <input type="checkbox"/> 10-15 minutes</p>                                                                                                                                                                                                                                                                                                        |                                                      |
| <p><b>3. Where did you find the ACP documentation?</b></p>                                                                                                      | <p><input type="checkbox"/> Paper record<br/> <input type="checkbox"/> Electronic record</p>                                                                                                                                                                                                                                                                                                                                                      |                                                      |
| <p><b>4. In which section of the record did you find the ACP documentation? (please tick all that apply)</b></p>                                                | <p><input type="checkbox"/> Specified area for ACP documentation<br/> <input type="checkbox"/> Legal section<br/> <input type="checkbox"/> Notes section<br/> <input type="checkbox"/> My Health Record<br/> <input type="checkbox"/> Other (please specify)</p>                                                                                                                                                                                  |                                                      |
| <p><b>5. What type of documentation did you find?</b></p>                                                                                                       | <p><input type="checkbox"/> Statutory advance care directive documentation (if YES please go to Question 6)<br/> <input type="checkbox"/> Legally appointed substitute decision maker (If YES, please go to Question 7)<br/> <input type="checkbox"/> Non-statutory advance care directive documentation (If YES please go to Question 8)<br/> <input type="checkbox"/> Other documentation (If YES please go to Question 9) (please specify)</p> |                                                      |

1  
2  
3  
4  
5  
6  
7  
8  
9  
10  
11  
12  
13  
14  
15  
16  
17  
18  
19  
20  
21  
22  
23  
24  
25  
26  
27  
28  
29  
30  
31  
32  
33  
34  
35  
36  
37  
38  
39  
40  
41  
42  
43  
44  
45  
46  
47  
48  
49

|                                                                                  |                                                                                                                                                                                                                                                                                                                                                                                                                                              |
|----------------------------------------------------------------------------------|----------------------------------------------------------------------------------------------------------------------------------------------------------------------------------------------------------------------------------------------------------------------------------------------------------------------------------------------------------------------------------------------------------------------------------------------|
| <b>6. Details of the person’s statutory advance care directive documentation</b> | <input type="checkbox"/> Yes, there is a copy<br><input type="checkbox"/> No – I did not find a copy of the advance care directive but documentation in notes indicates that person has a statutory advance care directive (please go to Question 7)<br><input type="checkbox"/> No document or notes located                                                                                                                                |
|                                                                                  | If YES, please specify the name of the document                                                                                                                                                                                                                                                                                                                                                                                              |
|                                                                                  | <b>Was the document signed</b><br><input type="checkbox"/> Yes<br><input type="checkbox"/> No (If NO please go to Question 7)                                                                                                                                                                                                                                                                                                                |
|                                                                                  | <b>Who signed the document? (please tick all that apply)</b><br><input type="checkbox"/> Person<br><input type="checkbox"/> Doctor<br><input type="checkbox"/> Legal practitioner<br><input type="checkbox"/> Justice of Peace<br><input type="checkbox"/> Appointed decision maker<br><input type="checkbox"/> Unable to determine<br><input type="checkbox"/> Signatures were not found<br><input type="checkbox"/> Other (please specify) |
|                                                                                  | <input type="checkbox"/> Not Applicable                                                                                                                                                                                                                                                                                                                                                                                                      |
| <b>7. Details of the person’s legally appointed substitute decision maker</b>    | <input type="checkbox"/> Yes, there is a copy<br><input type="checkbox"/> No - did not find a copy of the advance care directive but documentation in notes indicates that person has a legally appointed substitute decision maker (Please go to Question 8)<br><input type="checkbox"/> No document or notes located                                                                                                                       |
|                                                                                  | <b>If YES, please specify the name of the document</b>                                                                                                                                                                                                                                                                                                                                                                                       |

|                                                                                             |                                                                                                                                                                                                                                                                                                                                                                                                                                                                                                                                                                                                                                                                                                                                                                                                                                                                                                                                                                                                                                                                                                                                                                                                                                                                                                 |
|---------------------------------------------------------------------------------------------|-------------------------------------------------------------------------------------------------------------------------------------------------------------------------------------------------------------------------------------------------------------------------------------------------------------------------------------------------------------------------------------------------------------------------------------------------------------------------------------------------------------------------------------------------------------------------------------------------------------------------------------------------------------------------------------------------------------------------------------------------------------------------------------------------------------------------------------------------------------------------------------------------------------------------------------------------------------------------------------------------------------------------------------------------------------------------------------------------------------------------------------------------------------------------------------------------------------------------------------------------------------------------------------------------|
|                                                                                             | <p><b>What is the relationship of the substitute decision maker to the person? (Please tick all that apply)</b></p> <p><input type="checkbox"/> Spouse/partner</p> <p><input type="checkbox"/> Child</p> <p><input type="checkbox"/> Sibling</p> <p><input type="checkbox"/> Other family</p> <p><input type="checkbox"/> Friend</p> <p><input type="checkbox"/> Other (please specify)</p> <hr/> <p><b>Was the document signed?</b></p> <p><input type="checkbox"/> Yes</p> <p><input type="checkbox"/> No (If NO , please go to Question 8)</p> <hr/> <p><b>Who signed the document? (please tick all that apply)</b></p> <p><input type="checkbox"/> Person</p> <p><input type="checkbox"/> Doctor</p> <p><input type="checkbox"/> Legal practitioner</p> <p><input type="checkbox"/> Justice of Peace</p> <p><input type="checkbox"/> Appointed decision maker</p> <p><input type="checkbox"/> Unable to determine</p> <p><input type="checkbox"/> Signatures were not found</p> <p><input type="checkbox"/> Other (please specify)</p> <hr/> <p><input type="checkbox"/> Not Applicable</p> <hr/> <p><b>Is the document signed in accordance with legislation?</b></p> <p><input type="checkbox"/> Yes</p> <p><input type="checkbox"/> No</p> <p><input type="checkbox"/> I don't know</p> |
| <p><b>8. Details of the person's non-statutory advance care directive documentation</b></p> | <p><input type="checkbox"/> Yes, there is a copy</p> <p><input type="checkbox"/> No - did not find a copy of the advanced care directive but documentation in notes indicates that person has non-statutory advance care directive documentation (please go to Question 9)</p>                                                                                                                                                                                                                                                                                                                                                                                                                                                                                                                                                                                                                                                                                                                                                                                                                                                                                                                                                                                                                  |

1  
2  
3  
4  
5  
6  
7  
8  
9  
10  
11  
12  
13  
14  
15  
16  
17  
18  
19  
20  
21  
22  
23  
24  
25  
26  
27  
28  
29  
30  
31  
32  
33  
34  
35  
36  
37  
38  
39  
40  
41  
42  
43  
44  
45  
46  
47  
48  
49

|                                                                                                                         |                                                                                                                                                                                                                                                                                                                                                                                                                                                                                                                                                                                                                                              |
|-------------------------------------------------------------------------------------------------------------------------|----------------------------------------------------------------------------------------------------------------------------------------------------------------------------------------------------------------------------------------------------------------------------------------------------------------------------------------------------------------------------------------------------------------------------------------------------------------------------------------------------------------------------------------------------------------------------------------------------------------------------------------------|
|                                                                                                                         | <p><b>If YES, please specify the name of the document</b></p>                                                                                                                                                                                                                                                                                                                                                                                                                                                                                                                                                                                |
|                                                                                                                         | <p><b>Was the document signed?</b><br/> <input type="checkbox"/> Yes<br/> <input type="checkbox"/> No (if NO , please go to Question 9)</p>                                                                                                                                                                                                                                                                                                                                                                                                                                                                                                  |
|                                                                                                                         | <p><b>Who signed the document? (Please tick all that apply)</b><br/> <input type="checkbox"/> Person<br/> <input type="checkbox"/> Doctor<br/> <input type="checkbox"/> Legal practitioner<br/> <input type="checkbox"/> Justice of Peace<br/> <input type="checkbox"/> Appointed decision maker<br/> <input type="checkbox"/> Unable to determine<br/> <input type="checkbox"/> Signatures were not found<br/> <input type="checkbox"/> Other (please specify)<br/> <input type="checkbox"/> Not Applicable</p>                                                                                                                             |
|                                                                                                                         | <p><b>Is the document signed in accordance with legislation?</b><br/> <input type="checkbox"/> Yes<br/> <input type="checkbox"/> No<br/> <input type="checkbox"/> I don't know</p>                                                                                                                                                                                                                                                                                                                                                                                                                                                           |
| <p><b>9. Details of the person's other type of advance care planning documentation (please tick all that apply)</b></p> | <p><input type="checkbox"/> Yes, there are other type(s) of ACP documentation<br/> <input type="checkbox"/> No did not find copy(ies) of other type(s) of ACP documentation, but documentation in notes indicates that person has a substitute decision maker (please go to Question 10)<br/>         If YES, please specify the name(s) of the document(s)<br/>         The document(s) are in the form of (please tick all that apply):<br/> <input type="checkbox"/> Notes<br/> <input type="checkbox"/> Charts<br/> <input type="checkbox"/> Letters<br/> <input type="checkbox"/> Goals of Care with person's wishes clearly stated</p> |

1  
2  
3  
4  
5  
6  
7  
8  
9  
10  
11  
12  
13  
14  
15  
16  
17  
18  
19  
20  
21  
22  
23  
24  
25  
26  
27  
28  
29  
30  
31  
32  
33  
34  
35  
36  
37  
38  
39  
40  
41  
42  
43  
44  
45  
46  
47  
48  
49

|                                                                          |                                                                                                                                                                                                                                                                                                                                                                                                                                                                         |
|--------------------------------------------------------------------------|-------------------------------------------------------------------------------------------------------------------------------------------------------------------------------------------------------------------------------------------------------------------------------------------------------------------------------------------------------------------------------------------------------------------------------------------------------------------------|
|                                                                          | <input type="checkbox"/> Evidence or statement of family awareness of person’s advance care plan<br><input type="checkbox"/> Interstate advance care directive<br><input type="checkbox"/> Other correspondence (please specify)                                                                                                                                                                                                                                        |
|                                                                          | <b>Who completed the document?</b><br><input type="checkbox"/> Person<br><input type="checkbox"/> Doctor<br><input type="checkbox"/> Nurse<br><input type="checkbox"/> Other (please specify)                                                                                                                                                                                                                                                                           |
| <b>PERSON’S PREFERENCES</b>                                              |                                                                                                                                                                                                                                                                                                                                                                                                                                                                         |
| <b>10. Can you locate the person’s preferences regarding their care?</b> | <input type="checkbox"/> Yes<br><input type="checkbox"/> No (If NO go to SECTION 2)<br><b>If YES, does it include:</b><br><input type="checkbox"/> Life prolonging treatment<br><input type="checkbox"/> Life prolonging treatment with specific outcomes / or some limitations of treatment<br><input type="checkbox"/> No life prolonging treatment<br><input type="checkbox"/> Person does not want to make the decision<br><input type="checkbox"/> I cannot locate |
| <b>11. Other preferences (pleas tick all that apply)</b>                 | <input type="checkbox"/> Preferred place of care/location<br><input type="checkbox"/> Preferred place of death/location<br><input type="checkbox"/> Other preferences and values (please specify)<br><input type="checkbox"/> None                                                                                                                                                                                                                                      |
| <b>SECTION 2. MEDICAL ORDERS</b>                                         |                                                                                                                                                                                                                                                                                                                                                                                                                                                                         |
| <b>12. Is there a medical order limiting treatment?</b>                  | <input type="checkbox"/> Yes<br><input type="checkbox"/> No (go to SECTION 3)                                                                                                                                                                                                                                                                                                                                                                                           |
| <b>13. What are the limitations on the order?</b>                        | <input type="checkbox"/> No limitation of treatment                                                                                                                                                                                                                                                                                                                                                                                                                     |
|                                                                          | <input type="checkbox"/> Limitation of treatment                                                                                                                                                                                                                                                                                                                                                                                                                        |
|                                                                          | <b>If there is a limitation on treatment (please tick all that apply):</b><br><input type="checkbox"/> Not for cardiopulmonary resuscitation (CPR)                                                                                                                                                                                                                                                                                                                      |

1  
2  
3  
4  
5  
6  
7  
8  
9  
10  
11  
12  
13  
14  
15  
16  
17  
18  
19  
20  
21  
22  
23  
24  
25  
26  
27  
28  
29  
30  
31  
32  
33  
34  
35  
36  
37  
38  
39  
40  
41  
42  
43  
44  
45  
46  
47  
48  
49

|                                                                                                                                 |                                                                                                                                                                                                                                                                  |
|---------------------------------------------------------------------------------------------------------------------------------|------------------------------------------------------------------------------------------------------------------------------------------------------------------------------------------------------------------------------------------------------------------|
|                                                                                                                                 | <input type="checkbox"/> Not for intubation<br><input type="checkbox"/> Not for intensive care unit (ICU)<br><input type="checkbox"/> Not for hospitalisation<br><input type="checkbox"/> Not for antibiotics<br><input type="checkbox"/> Other (please specify) |
|                                                                                                                                 | <input type="checkbox"/> Comfort care/palliative care (i.e. no life prolonging treatment)                                                                                                                                                                        |
|                                                                                                                                 | <input type="checkbox"/> Symptom management is primary goal (palliative care)                                                                                                                                                                                    |
|                                                                                                                                 | <input type="checkbox"/> Other orders (please specify)                                                                                                                                                                                                           |
| <b>14. Does the medical order acknowledge the person’s advance care directive/advance care plan?</b>                            | <input type="checkbox"/> Yes<br><input type="checkbox"/> No<br><input type="checkbox"/> Not applicable<br><input type="checkbox"/> Unclear                                                                                                                       |
| <b>15. Does the medical order acknowledge discussion with patient/family?</b>                                                   | <input type="checkbox"/> Yes<br><input type="checkbox"/> No<br><input type="checkbox"/> Unclear                                                                                                                                                                  |
| <b>16. If there is an advance care directive/advance care plan, are the medical orders consistent with the person’s wishes?</b> | <input type="checkbox"/> Yes<br><input type="checkbox"/> No<br><input type="checkbox"/> Not applicable<br><input type="checkbox"/> Unclear                                                                                                                       |

| <b>SECTION 3. PERSON’S DETAILS</b> |  |
|------------------------------------|--|
| <b>17. Age</b>                     |  |

|                                                           |                                                                                                                                                                                                                                            |
|-----------------------------------------------------------|--------------------------------------------------------------------------------------------------------------------------------------------------------------------------------------------------------------------------------------------|
| <b>18. Sex</b>                                            | <input type="checkbox"/> Male<br><input type="checkbox"/> Female<br><input type="checkbox"/> Other (please specify)                                                                                                                        |
| <b>19. Postcode</b>                                       |                                                                                                                                                                                                                                            |
| <b>20. Country of birth</b>                               | <input type="checkbox"/> Australia<br><input type="checkbox"/> Other (please specify)<br><input type="checkbox"/> Unknown – information not available in record                                                                            |
| <b>21. Indigenous status</b>                              | <input type="checkbox"/> Aboriginal<br><input type="checkbox"/> Torres Strait Islander<br><input type="checkbox"/> Both Aboriginal and Torres Strait Islander<br><input type="checkbox"/> Not stated (information not available in record) |
| <b>22. Ethnicity</b>                                      | <input type="checkbox"/> Available (please specify)<br><input type="checkbox"/> Unknown – information not available in record                                                                                                              |
| <b>23. Religion</b>                                       | <input type="checkbox"/> Available (please specify)<br><input type="checkbox"/> Unknown – information not available in record                                                                                                              |
| <b>24. Language status</b>                                | <input type="checkbox"/> Speaks English<br><input type="checkbox"/> Interpreter required (please specify the language)<br><input type="checkbox"/> Unknown – information not available in record                                           |
| <b>25. Date of person's admission/visit</b>               |                                                                                                                                                                                                                                            |
| <b>26. Person came from</b>                               | <input type="checkbox"/> Aged care facility<br><input type="checkbox"/> Hospital<br><input type="checkbox"/> Home<br><input type="checkbox"/> Other (please specify)                                                                       |
| <b>27. Medical condition (please tick all that apply)</b> | <input type="checkbox"/> Circulatory system<br><input type="checkbox"/> Respiratory system<br><input type="checkbox"/> Neurological system                                                                                                 |



1  
2  
3  
4  
5  
6  
7  
8  
9  
10  
11  
12  
13  
14  
15  
16  
17  
18  
19  
20  
21  
22  
23  
24  
25  
26  
27  
28  
29  
30  
31  
32  
33  
34  
35  
36  
37  
38  
39  
40  
41  
42  
43  
44  
45  
46  
47  
48  
49

|                                                                                                                                                                                                                                                                                                 |                                                                                                                                                                                                                                                                                                                                                                                                                                                                                                                                                                                                                                                                                                                                                      |                                                                                                                                            |
|-------------------------------------------------------------------------------------------------------------------------------------------------------------------------------------------------------------------------------------------------------------------------------------------------|------------------------------------------------------------------------------------------------------------------------------------------------------------------------------------------------------------------------------------------------------------------------------------------------------------------------------------------------------------------------------------------------------------------------------------------------------------------------------------------------------------------------------------------------------------------------------------------------------------------------------------------------------------------------------------------------------------------------------------------------------|--------------------------------------------------------------------------------------------------------------------------------------------|
|                                                                                                                                                                                                                                                                                                 | <input type="checkbox"/> Gastrointestinal system<br><input type="checkbox"/> Musculoskeletal and connective tissue<br><input type="checkbox"/> Endocrine, nutritional and metabolic disorders<br><input type="checkbox"/> Urinary/excretory and reproductive<br><input type="checkbox"/> Cancer<br><input type="checkbox"/> Mental Illness<br><input type="checkbox"/> Dementia<br><input type="checkbox"/> Other (please specify)                                                                                                                                                                                                                                                                                                                   |                                                                                                                                            |
| <b>28. Is this person receiving palliative care?</b>                                                                                                                                                                                                                                            | <input type="checkbox"/> Yes<br><input type="checkbox"/> No<br><input type="checkbox"/> Unknown                                                                                                                                                                                                                                                                                                                                                                                                                                                                                                                                                                                                                                                      | If Yes, is the palliative care from the specialist palliative care service?<br><input type="checkbox"/> Yes<br><input type="checkbox"/> No |
| <b>29. Eastern Cooperative Oncology group (ECOG) performance status – this is a scale used to assess how a person’s disease is progressing and how the disease impacts the daily living abilities of the person. This information can help to determine appropriate treatment and prognosis</b> | <input type="checkbox"/> Fully active, able to carry on all pre-disease performance without restriction<br><input type="checkbox"/> Restricted in physically strenuous activity, but ambulatory and able to carry out work of a light or sedentary nature, e.g., light house work, office work<br><input type="checkbox"/> Ambulatory and capable of all selfcare but unable to carry out any work activities; up and about more than 50% of waking hours<br><input type="checkbox"/> Capable of only limited selfcare; confined to bed or chair more than 50% of waking hours<br><input type="checkbox"/> Completely disabled; cannot carry on any selfcare; totally confined to bed or chair<br><input type="checkbox"/> Information not available |                                                                                                                                            |

## PERSON SURVEY

**Study ID number**

**Study site**

**Date form completed** \_\_\_ / \_\_\_ / \_\_\_

### Section 1: About you

|                                     |                                                                                                                                                                                                                                                 |
|-------------------------------------|-------------------------------------------------------------------------------------------------------------------------------------------------------------------------------------------------------------------------------------------------|
| 1. I am completing this survey:     | <input type="checkbox"/> On my own without help from someone else<br><input type="checkbox"/> With help from someone else (e.g. friend/relative, staff member)                                                                                  |
| 2. I am:                            | <input type="checkbox"/> Male<br><input type="checkbox"/> Female<br><input type="checkbox"/> Other (please specify)                                                                                                                             |
| 3. My age is:                       |                                                                                                                                                                                                                                                 |
| 4. I was born in:                   | <input type="checkbox"/> Australia<br><input type="checkbox"/> Other country (please specify)                                                                                                                                                   |
| 5. I am:                            | <input type="checkbox"/> Aboriginal<br><input type="checkbox"/> Torres Strait Islander<br><input type="checkbox"/> Both Aboriginal and Torres Strait Islander<br><input type="checkbox"/> Neither<br><input type="checkbox"/> Prefer not to say |
| 6. The language I speak at home is: |                                                                                                                                                                                                                                                 |
| 7. Are you religious?               | <input type="checkbox"/> Yes (please go to Q.8)<br><input type="checkbox"/> No<br><input type="checkbox"/> Prefer not to answer (please go to Question 9)                                                                                       |

1  
2  
3  
4  
5  
6  
7  
8  
9  
10  
11  
12  
13  
14  
15  
16  
17  
18  
19  
20  
21  
22  
23  
24  
25  
26  
27  
28  
29  
30  
31  
32  
33  
34  
35  
36  
37  
38  
39  
40  
41  
42  
43  
44  
45  
46  
47  
48  
49

|                                              |                                                                                                                                                                                                                                                                                                                                             |
|----------------------------------------------|---------------------------------------------------------------------------------------------------------------------------------------------------------------------------------------------------------------------------------------------------------------------------------------------------------------------------------------------|
| 8. How important is your religion to you?    | <input type="checkbox"/> Very important<br><input type="checkbox"/> Important<br><input type="checkbox"/> Somewhat important<br><input type="checkbox"/> Not important                                                                                                                                                                      |
| 9. What is your current relationship status? | <input type="checkbox"/> Married/de facto/in a relationship<br><input type="checkbox"/> Single<br><input type="checkbox"/> Divorced or separated<br><input type="checkbox"/> Widowed                                                                                                                                                        |
| 10. What is your highest level of education? | <input type="checkbox"/> No formal schooling<br><input type="checkbox"/> Primary school (Highest year completed)<br><input type="checkbox"/> Secondary or High school (Highest year completed)<br><input type="checkbox"/> Trade school or Apprenticeship<br><input type="checkbox"/> Diploma<br><input type="checkbox"/> University degree |
| 11. Who do you live with?                    | <input type="checkbox"/> Husband/wife/partner<br><input type="checkbox"/> Children<br><input type="checkbox"/> Brother/sister<br><input type="checkbox"/> Other family<br><input type="checkbox"/> Friends<br><input type="checkbox"/> I live alone                                                                                         |

|                                                                                    |                                                                                                                                                                                                                                                                            |
|------------------------------------------------------------------------------------|----------------------------------------------------------------------------------------------------------------------------------------------------------------------------------------------------------------------------------------------------------------------------|
| <b>Section 2: About your health</b>                                                |                                                                                                                                                                                                                                                                            |
| Under each heading, please tick the ONE box that best describes your health TODAY. |                                                                                                                                                                                                                                                                            |
| 12. Mobility                                                                       | <input type="checkbox"/> I have no problems in walking about<br><input type="checkbox"/> I have slight problems in walking about<br><input type="checkbox"/> I have moderate problems in walking about<br><input type="checkbox"/> I have severe problems in walking about |

|                                                                                           |                                                                                                                                                                                                                                                                                                                                                                                    |
|-------------------------------------------------------------------------------------------|------------------------------------------------------------------------------------------------------------------------------------------------------------------------------------------------------------------------------------------------------------------------------------------------------------------------------------------------------------------------------------|
|                                                                                           | <input type="checkbox"/> I am unable to walk about                                                                                                                                                                                                                                                                                                                                 |
| 13. Usual Activities ( <i>e.g. work, study, housework, family or leisure activities</i> ) | <input type="checkbox"/> I have no problems doing my usual activities<br><input type="checkbox"/> I have slight problems doing my usual activities<br><input type="checkbox"/> I have moderate problems doing my usual activities<br><input type="checkbox"/> I have severe problems doing my usual activities<br><input type="checkbox"/> I am unable to do my usual activities   |
| 14. Self-Care                                                                             | <input type="checkbox"/> I have no problems washing or dressing myself<br><input type="checkbox"/> I have slight problems washing or dressing myself<br><input type="checkbox"/> I have moderate problems washing or dressing myself<br><input type="checkbox"/> I have severe problems washing or dressing myself<br><input type="checkbox"/> I am unable to wash or dress myself |
| 15. Pain/discomfort                                                                       | <input type="checkbox"/> I have no pain or discomfort<br><input type="checkbox"/> I have slight pain or discomfort<br><input type="checkbox"/> I have moderate pain or discomfort<br><input type="checkbox"/> I have severe pain or discomfort<br><input type="checkbox"/> I have extreme pain or discomfort                                                                       |
| 16. Anxiety/depression                                                                    | <input type="checkbox"/> I am not anxious or depressed<br><input type="checkbox"/> I am slightly anxious or depressed<br><input type="checkbox"/> I am moderately anxious or depressed<br><input type="checkbox"/> I am severely anxious or depressed<br><input type="checkbox"/> I am extremely anxious or depressed                                                              |

1  
2  
3  
4  
5  
6  
7  
8  
9  
10  
11  
12  
13  
14  
15  
16  
17  
18  
19  
20  
21  
22  
23  
24  
25  
26  
27  
28  
29  
30  
31  
32  
33  
34  
35  
36  
37  
38  
39  
40  
41  
42  
43  
44  
45  
46  
47  
48  
49

| <b>Section 3: Your understanding and experience of advance care planning</b><br><i>ADVANCE CARE PLANNING is the opportunity for people to tell their family, friends and doctors ahead of time, what they would want if they became seriously ill and could no longer speak for themselves. Ideally they would talk to their family, friends and doctors. It is also a good idea to write it down.</i> |                                                                                                                                                                                                                                                                                                                                                                                                                                                                                                                                                 |
|--------------------------------------------------------------------------------------------------------------------------------------------------------------------------------------------------------------------------------------------------------------------------------------------------------------------------------------------------------------------------------------------------------|-------------------------------------------------------------------------------------------------------------------------------------------------------------------------------------------------------------------------------------------------------------------------------------------------------------------------------------------------------------------------------------------------------------------------------------------------------------------------------------------------------------------------------------------------|
| 17. Have you ever heard about advance care planning?                                                                                                                                                                                                                                                                                                                                                   | <input type="checkbox"/> Yes, I have heard of advance care planning<br><input type="checkbox"/> Yes, I have an advance care plan or advance care directive<br><input type="checkbox"/> No, I haven't heard of advance care planning before                                                                                                                                                                                                                                                                                                      |
| 18. Thinking about advance care planning in general terms, which of the following statements most closely applies to you?                                                                                                                                                                                                                                                                              | <input type="checkbox"/> I am not interested in advance care planning<br><input type="checkbox"/> I am thinking about advance care planning<br><input type="checkbox"/> I am planning on doing advance care planning<br><input type="checkbox"/> I have spoken to someone (e.g. my family/friends/carer/doctor) about advance care planning<br><input type="checkbox"/> I have written my preferences in an advance care plan/advance care directive/other document<br><input type="checkbox"/> I review my advance care plan from time to time |
| 19. Who would you trust to make medical decisions for you if you were too unwell to do so yourself? (please tick all that apply)                                                                                                                                                                                                                                                                       | <input type="checkbox"/> Husband/wife/ partner<br><input type="checkbox"/> Children<br><input type="checkbox"/> Brother/sister<br><input type="checkbox"/> Other family<br><input type="checkbox"/> Friend<br><input type="checkbox"/> Doctor<br><input type="checkbox"/> Other (please specify)<br><input type="checkbox"/> I can't decide<br><input type="checkbox"/> I have not thought about that yet                                                                                                                                       |
| 20. What things would <b>worry you most</b> about your future? (please tick all that apply)                                                                                                                                                                                                                                                                                                            | <input type="checkbox"/> Not being able to look after myself<br><input type="checkbox"/> Being in pain/distressed<br><input type="checkbox"/> Not being able to get out of bed                                                                                                                                                                                                                                                                                                                                                                  |

1  
2  
3  
4  
5  
6  
7  
8  
9  
10  
11  
12  
13  
14  
15  
16  
17  
18  
19  
20  
21  
22  
23  
24  
25  
26  
27  
28  
29  
30  
31  
32  
33  
34  
35  
36  
37  
38  
39  
40  
41  
42  
43  
44  
45  
46  
47  
48  
49

|                                                                                                                                                                     |                                                                                                                                                                                                                                                                                                                                                                                                                                                                                                       |
|---------------------------------------------------------------------------------------------------------------------------------------------------------------------|-------------------------------------------------------------------------------------------------------------------------------------------------------------------------------------------------------------------------------------------------------------------------------------------------------------------------------------------------------------------------------------------------------------------------------------------------------------------------------------------------------|
|                                                                                                                                                                     | <input type="checkbox"/> Not being able to make choices for myself<br><input type="checkbox"/> Relying on others<br><input type="checkbox"/> Being a burden on my family/ friends/carers<br><input type="checkbox"/> Not being able to talk to my family/ friends/carers<br><input type="checkbox"/> Not wanting to go to hospital<br><input type="checkbox"/> Wanting to live as long as possible<br><input type="checkbox"/> Wanting to get well<br><input type="checkbox"/> Other (please specify) |
| 21. Thinking about your future, if you became really unwell or unconscious, and couldn't tell the doctors what you want, which sentence reflects best how you feel? | <input type="checkbox"/> I want to live for as long as possible<br><input type="checkbox"/> I want to live as long as possible but only if my acceptable outcomes and preferences for care are likely<br><input type="checkbox"/> I would not want any treatment that was to prolong my life, I would want to receive comfort care<br><input type="checkbox"/> I would not want to make this decision myself. The person I would want to make this decision for me is my _____                        |

| <b>Section 4: Telling others about your advance care plans</b>                                                                                                                                   |                                                                                                                                                                                                                                                                                                                                                                                                                               |
|--------------------------------------------------------------------------------------------------------------------------------------------------------------------------------------------------|-------------------------------------------------------------------------------------------------------------------------------------------------------------------------------------------------------------------------------------------------------------------------------------------------------------------------------------------------------------------------------------------------------------------------------|
| 22. Have you ever talked to anyone about your goals, values, beliefs or your preferences about specific medical treatment in case you become seriously ill or unable to make your own decisions? | <input type="checkbox"/> Yes<br><input type="checkbox"/> No (If NO, go to Question 24)<br><input type="checkbox"/> I cannot remember (If you cannot remember, go to Question 24)<br>If YES, who did you talk to?<br><input type="checkbox"/> Husband/wife/partner<br><input type="checkbox"/> Children<br><input type="checkbox"/> Brother/sister<br><input type="checkbox"/> Other family<br><input type="checkbox"/> Friend |

1  
2  
3  
4  
5  
6  
7  
8  
9  
10  
11  
12  
13  
14  
15  
16  
17  
18  
19  
20  
21  
22  
23  
24  
25  
26  
27  
28  
29  
30  
31  
32  
33  
34  
35  
36  
37  
38  
39  
40  
41  
42  
43  
44  
45  
46  
47  
48  
49

|                                                                                                                                                                                            |                                                                                                                                                                                                                                                                                                                              |
|--------------------------------------------------------------------------------------------------------------------------------------------------------------------------------------------|------------------------------------------------------------------------------------------------------------------------------------------------------------------------------------------------------------------------------------------------------------------------------------------------------------------------------|
|                                                                                                                                                                                            | <input type="checkbox"/> Doctor<br><input type="checkbox"/> Other (please specify)<br><input type="checkbox"/> I can't decide<br><input type="checkbox"/> I have not thought about that yet                                                                                                                                  |
| 23. Have you ever written down your goals, values, and beliefs or your preferences about specific medical treatment in case you become seriously ill or unable to make your own decisions? | <input type="checkbox"/> Yes<br><input type="checkbox"/> No (If NO go to Question 25)<br><input type="checkbox"/> I cannot remember (If you cannot remember go to Question 25)<br>If YES, how long ago did you do this?<br><hr/> In what type of document did you write this?<br><hr/> Where is this document kept?<br><hr/> |
| 24. Have you ever signed a legal document to appoint someone to make healthcare decisions on your behalf if you were unable to make your own decisions?                                    | <input type="checkbox"/> Yes<br><input type="checkbox"/> No (If NO go to Question 26)<br><input type="checkbox"/> I cannot remember (If you cannot remember go to Question 26)                                                                                                                                               |
|                                                                                                                                                                                            | If YES how long ago did you sign this document?<br><hr/> What type of document did you sign?<br><hr/> Where is this document kept?<br><hr/>                                                                                                                                                                                  |
| 25. Any other comments regarding your experiences with advance care planning                                                                                                               |                                                                                                                                                                                                                                                                                                                              |

## STROBE Statement—checklist of items that should be included in reports of observational studies

|                           | Item No | Recommendation                                                                                                                                                                                                                                                                                                                                                                                                                                                         |                  |
|---------------------------|---------|------------------------------------------------------------------------------------------------------------------------------------------------------------------------------------------------------------------------------------------------------------------------------------------------------------------------------------------------------------------------------------------------------------------------------------------------------------------------|------------------|
| <b>Title and abstract</b> | 1       | (a) Indicate the study's design with a commonly used term in the title or the abstract                                                                                                                                                                                                                                                                                                                                                                                 | YES, p.1         |
|                           |         | (b) Provide in the abstract an informative and balanced summary of what was done and what was found                                                                                                                                                                                                                                                                                                                                                                    | YES, p.3         |
| <b>Introduction</b>       |         |                                                                                                                                                                                                                                                                                                                                                                                                                                                                        |                  |
| Background/rationale      | 2       | Explain the scientific background and rationale for the investigation being reported                                                                                                                                                                                                                                                                                                                                                                                   | YES, p.5-7       |
| Objectives                | 3       | State specific objectives, including any prespecified hypotheses                                                                                                                                                                                                                                                                                                                                                                                                       | YES, p.7         |
| <b>Methods</b>            |         |                                                                                                                                                                                                                                                                                                                                                                                                                                                                        |                  |
| Study design              | 4       | Present key elements of study design early in the paper                                                                                                                                                                                                                                                                                                                                                                                                                | YES, p.8         |
| Setting                   | 5       | Describe the setting, locations, and relevant dates, including periods of recruitment, exposure, follow-up, and data collection                                                                                                                                                                                                                                                                                                                                        | YES, p.8-9       |
| Participants              | 6       | (a) <i>Cohort study</i> —Give the eligibility criteria, and the sources and methods of selection of participants. Describe methods of follow-up<br><i>Case-control study</i> —Give the eligibility criteria, and the sources and methods of case ascertainment and control selection. Give the rationale for the choice of cases and controls<br><i>Cross-sectional study</i> —Give the eligibility criteria, and the sources and methods of selection of participants | YES, p.9         |
|                           |         | (b) <i>Cohort study</i> —For matched studies, give matching criteria and number of exposed and unexposed<br><i>Case-control study</i> —For matched studies, give matching criteria and the number of controls per case                                                                                                                                                                                                                                                 | NA               |
| Variables                 | 7       | Clearly define all outcomes, exposures, predictors, potential confounders, and effect modifiers. Give diagnostic criteria, if applicable                                                                                                                                                                                                                                                                                                                               | YES, p.12        |
| Data sources/measurement  | 8*      | For each variable of interest, give sources of data and details of methods of assessment (measurement). Describe comparability of assessment methods if there is more than one group                                                                                                                                                                                                                                                                                   | YES, p.12        |
| Bias                      | 9       | Describe any efforts to address potential sources of bias                                                                                                                                                                                                                                                                                                                                                                                                              | NA (pilot study) |
| Study size                | 10      | Explain how the study size was arrived at                                                                                                                                                                                                                                                                                                                                                                                                                              | YES, p.12        |
| Quantitative variables    | 11      | Explain how quantitative variables were handled in the analyses. If applicable, describe which groupings were chosen and why                                                                                                                                                                                                                                                                                                                                           | YES, p.13-14     |
| Statistical methods       | 12      | (a) Describe all statistical methods, including those used to control for confounding                                                                                                                                                                                                                                                                                                                                                                                  | YES, p.13-14     |
|                           |         | (b) Describe any methods used to examine subgroups and interactions                                                                                                                                                                                                                                                                                                                                                                                                    | YES, p.13-14     |
|                           |         | (c) Explain how missing data were addressed                                                                                                                                                                                                                                                                                                                                                                                                                            | NA               |
|                           |         | (d) <i>Cohort study</i> —If applicable, explain how loss to follow-up was addressed<br><i>Case-control study</i> —If applicable, explain how matching of cases and controls was addressed<br><i>Cross-sectional study</i> —If applicable, describe analytical methods taking                                                                                                                                                                                           | NA               |



account of sampling strategy

(e) Describe any sensitivity analyses

## Results [NOT APPLICABLE, STUDY PROTOCOL]

|                          |     |                                                                                                                                                                                                                                                                                                                                                                                                               |
|--------------------------|-----|---------------------------------------------------------------------------------------------------------------------------------------------------------------------------------------------------------------------------------------------------------------------------------------------------------------------------------------------------------------------------------------------------------------|
| Participants             | 13* | (a) Report numbers of individuals at each stage of study—eg numbers potentially eligible, examined for eligibility, confirmed eligible, included in the study, completing follow-up, and analysed<br>(b) Give reasons for non-participation at each stage<br>(c) Consider use of a flow diagram                                                                                                               |
| Descriptive data         | 14* | (a) Give characteristics of study participants (eg demographic, clinical, social) and information on exposures and potential confounders<br>(b) Indicate number of participants with missing data for each variable of interest<br>(c) <i>Cohort study</i> —Summarise follow-up time (eg, average and total amount)                                                                                           |
| Outcome data             | 15* | <i>Cohort study</i> —Report numbers of outcome events or summary measures over time<br><i>Case-control study</i> —Report numbers in each exposure category, or summary measures of exposure<br><i>Cross-sectional study</i> —Report numbers of outcome events or summary measures                                                                                                                             |
| Main results             | 16  | (a) Give unadjusted estimates and, if applicable, confounder-adjusted estimates and their precision (eg, 95% confidence interval). Make clear which confounders were adjusted for and why they were included<br>(b) Report category boundaries when continuous variables were categorized<br>(c) If relevant, consider translating estimates of relative risk into absolute risk for a meaningful time period |
| Other analyses           | 17  | Report other analyses done—eg analyses of subgroups and interactions, and sensitivity analyses                                                                                                                                                                                                                                                                                                                |
| <b>Discussion</b>        |     |                                                                                                                                                                                                                                                                                                                                                                                                               |
| Key results              | 18  | Summarise key results with reference to study objectives                                                                                                                                                                                                                                                                                                                                                      |
| Limitations              | 19  | Discuss limitations of the study, taking into account sources of potential bias or imprecision. Discuss both direction and magnitude of any potential bias                                                                                                                                                                                                                                                    |
| Interpretation           | 20  | Give a cautious overall interpretation of results considering objectives, limitations, multiplicity of analyses, results from similar studies, and other relevant evidence                                                                                                                                                                                                                                    |
| Generalisability         | 21  | Discuss the generalisability (external validity) of the study results                                                                                                                                                                                                                                                                                                                                         |
| <b>Other information</b> |     |                                                                                                                                                                                                                                                                                                                                                                                                               |
| Funding                  | 22  | Give the source of funding and the role of the funders for the present study and, if applicable, for the original study on which the present article is based                                                                                                                                                                                                                                                 |

\*Give information separately for cases and controls in case-control studies and, if applicable, for exposed and unexposed groups in cohort and cross-sectional studies.

**Note:** An Explanation and Elaboration article discusses each checklist item and gives methodological background and published examples of transparent reporting. The STROBE checklist is best used in conjunction with this article (freely available on the Web sites of PLoS Medicine at <http://www.plosmedicine.org/>, Annals of Internal Medicine at <http://www.annals.org/>, and Epidemiology at <http://www.epidem.com/>). Information on the STROBE Initiative is available at [www.strobe-statement.org](http://www.strobe-statement.org).

# BMJ Open

## Protocol for a national prevalence study of advance care planning documentation and self-reported uptake in Australia

|                                 |                                                                                                                                                                                                                                                                                                                                                                                                                                                                                                                                                                                                                                                                                                        |
|---------------------------------|--------------------------------------------------------------------------------------------------------------------------------------------------------------------------------------------------------------------------------------------------------------------------------------------------------------------------------------------------------------------------------------------------------------------------------------------------------------------------------------------------------------------------------------------------------------------------------------------------------------------------------------------------------------------------------------------------------|
| Journal:                        | <i>BMJ Open</i>                                                                                                                                                                                                                                                                                                                                                                                                                                                                                                                                                                                                                                                                                        |
| Manuscript ID                   | bmjopen-2017-018024.R1                                                                                                                                                                                                                                                                                                                                                                                                                                                                                                                                                                                                                                                                                 |
| Article Type:                   | Protocol                                                                                                                                                                                                                                                                                                                                                                                                                                                                                                                                                                                                                                                                                               |
| Date Submitted by the Author:   | 25-Jul-2017                                                                                                                                                                                                                                                                                                                                                                                                                                                                                                                                                                                                                                                                                            |
| Complete List of Authors:       | Ruseckaite, Rasa; Monash University, Epidemiology and Preventive Medicine<br>Detering, Karen; Austin Health, Advance care planning Program; University of Melbourne, Faculty of Medicine, Dentistry and Health Science<br>Evans, Sue; Department of Epidemiology and Preventive Me, Monash University<br>Perera, Veronika; Austin Health, Advance Care Planning Australia<br>Walker, Lynne; Austin Health, Advance Care Planning Australia<br>Sinclair, Craig; University of Western Australia, Rural Clinical School of Western Australia<br>Clayton, Josephine; Greenwich Hospital, HammondCare Palliative and Supportive Care Service<br>Nolte, Linda; Austin Health, Advance care planning Program |
| <b>Primary Subject Heading</b>: | Health services research                                                                                                                                                                                                                                                                                                                                                                                                                                                                                                                                                                                                                                                                               |
| Secondary Subject Heading:      | Epidemiology, General practice / Family practice, Palliative care, Patient-centred medicine                                                                                                                                                                                                                                                                                                                                                                                                                                                                                                                                                                                                            |
| Keywords:                       | advance care planning, prevalence, AUDIT, general practice, residential aged care, hospital                                                                                                                                                                                                                                                                                                                                                                                                                                                                                                                                                                                                            |
|                                 |                                                                                                                                                                                                                                                                                                                                                                                                                                                                                                                                                                                                                                                                                                        |

SCHOLARONE™  
Manuscripts

1  
2  
3 **Title:** Protocol for a national prevalence study of advance care planning documentation and  
4  
5 self-reported uptake in Australia  
6  
7  
8  
9

10  
11 **Corresponding author:**  
12

13 Dr Karen Detering, Austin Health, 145 Studley Road Heidelberg, Vic 3084, Australia

14 [karen.detering@austin.org.au](mailto:karen.detering@austin.org.au)  
15  
16  
17  
18  
19

20  
21 **Authors:**  
22

23  
24 *Rasa Ruseckaite*, Department of Epidemiology and Preventive Medicine, School of Public  
25 Health and Preventive Medicine, Monash University, Melbourne, Victoria, Australia  
26  
27  
28

29  
30  
31 *Karen M Detering*, Advance Care Planning Australia, Austin Health, Melbourne, Victoria,  
32 Australia; Faculty of Medicine, Dentistry and Health Sciences, Melbourne University,  
33 Melbourne, Victoria, Australia  
34  
35  
36  
37  
38

39  
40  
41 *Sue Evans*, Department of Epidemiology and Preventive Medicine, School of Public Health  
42 and Preventive Medicine, Monash University, Melbourne, Victoria, Australia  
43  
44  
45  
46  
47

48  
49 *Veronica Perera*, Advance Care Planning Australia, Austin Health, Melbourne, Victoria,  
50 Australia  
51  
52  
53  
54  
55  
56  
57  
58  
59  
60

1  
2  
3 *Lynne Walker*, Advance Care Planning Australia, Austin Health, Melbourne, Victoria,  
4  
5 Australia  
6  
7  
8  
9

10  
11 *Craig Sinclair*, Rural Clinical School of Western Australia, University of Western Australia,  
12  
13 Albany, Western Australia, Australia  
14  
15  
16  
17  
18

19 *Josephine M Clayton*, Hammond Care Palliative & Supportive Care Service, Greenwich  
20  
21 Hospital, Sydney, New South Wales, Australia; Australia and Sydney Medical School, The  
22  
23 University of Sydney, Sydney, New South Wales, Australia  
24  
25  
26  
27  
28

29 *Linda Nolte*, Advance Care Planning Australia, Austin Health, Melbourne, VIC, Australia  
30  
31  
32  
33  
34

35 **Word count:** text 3,579; abstract 300  
36  
37  
38  
39  
40  
41  
42  
43  
44  
45  
46  
47  
48  
49  
50  
51  
52  
53  
54  
55  
56  
57  
58  
59  
60

## ABSTRACT

**Introduction:** Advance care planning (ACP) is a process between a person, their family/carer(s) and healthcare providers that supports adults at any age or stage of health in understanding and sharing their personal values, life goals, and preferences regarding future medical care. The Australian government funds a number of national initiatives aimed at increasing ACP uptake, however there is currently no standardised Australian data regarding formal ACP documentation or self-reported uptake. This makes it difficult to evaluate the impact of ACP initiatives. This study aims to determine the Australian national prevalence of ACP and completion of Advance Care Directives (ACDs) in hospitals, aged care facilities and general practices. It will also explore people's self-reported use of ACP, and views about the process.

**Methods and analysis:** Researchers will conduct a national multicentre cross-sectional prevalence study, consisting of a record audit and surveys of people aged 65 years or more in three sectors. Fifty records from 49 participating Australian organisations will be audited (total of 2450 records). People whose records were audited, who speak English and have a decision-making capacity will also be invited to complete a survey. The primary outcome measure will be the number of people who have formal or informal ACP documentation that can be located in records within 15 minutes. Other outcomes will include demographics, measure of illness and functional capacity, details of ACP documentation (including type of document), location of documentation in the person's records and whether current clinical care plans are consistent with ACP documentation. People will be surveyed, to measure self-reported interest, uptake and use of ACP/ACDs, and self-reported quality of life.

1  
2  
3 **Ethics and dissemination:** This protocol has been approved by the Austin Health Human  
4  
5 Research Ethics Committee (reference HREC/17/Austin/83). Results will be submitted to  
6  
7 international peer-reviewed journals and presented at international conferences.  
8  
9

10 **Trial registration:** ACTRN12617000743369  
11

### 12 **Strengths and limitations of this study**

- 15  
16 • This is the first national multicentre cross-sectional prevalence study consisting of  
17 records audit and surveys of persons aged 65 years or more years aiming to  
18 determine the prevalence of advance care planning documentation in Australian  
19 hospitals, residential aged care facilities and general practices.  
20  
21
- 22 • The results of this study will inform future steps toward improved advance care  
23 planning data collection methodology, advance care planning implementation  
24 strategies and evaluation processes.  
25  
26
- 27 • This pilot study is principally aimed at establishing feasibility, and may lack statistical  
28 power to determine the actual prevalence of advance care planning documentation in  
29 Australia.  
30  
31  
32  
33  
34  
35  
36  
37  
38  
39  
40  
41  
42  
43  
44  
45  
46  
47  
48  
49  
50  
51  
52  
53  
54  
55  
56  
57  
58  
59  
60

## INTRODUCTION

### Background

Advance care planning (ACP) is a process between a person, their family/carer(s) and healthcare providers that supports adults at any age or stage of health in understanding and sharing their personal values, life goals, and preferences regarding future medical care (1, 2).

ACP is an ongoing process wherein people have the opportunity to discuss and plan for future decision-making, particularly for a time when they may not be able to make decisions for themselves. The ultimate goal of ACP is to align the care the person actually receives with their preferences. In order for this to occur, ACP information needs to be accessible when required, and treatment plans need to be developed in accordance with the person's values, goals, beliefs and specific preferences (3).

A person may choose to document their preferences for care in formal or informal documents.

An Advance Care Directive (ACD) is a type of formal document, recognised by common law or specific legislation that is completed and signed by a competent adult. It can record the person's preferences for future care, and appoint a substitute decision-maker to make decisions about health care and personal life management (2). Documentation of a person's preferences helps substitute decision-makers and services make informed decisions about care when a person is unable to express their preferences. Missing, ambiguous or inaccurate documentation can mean that preferences discussed or outlined in plans may not be followed.

While ACP documents are used in all Australian states and territories, they take different forms, have different names and, while recognised under common law, many are also prescribed by legislation (4). Examples of formal ACP documentation could include a written appointment of one or more substitute decision-makers, or completion of ACDs specifying instructions for future treatments (5). Informal approaches to ACP documentation are also

1  
2  
3 used, including non-statutory forms, personally written letters, a written plan outlining the  
4  
5 person's values, beliefs, and specific goals for care, and letters or documentation in a  
6  
7 person's record by a professional outlining the person's preferences. In some cases this  
8  
9 statutory and non-statutory documentation may be completed by a person's substitute  
10  
11 decision-maker, however such plans may not have the same legal weighting as statutory  
12  
13 documentation in some circumstances.  
14

15  
16  
17 Australia's population is ageing and the incidence of chronic and complex healthcare  
18  
19 conditions will rise accordingly. It is important to maintain an approach that meets personal  
20  
21 preferences for quality and end-of-life care as care needs change over time (6). Numerous  
22  
23 Australian and international studies have been conducted to understand issues related to end-  
24  
25 of-life care and how ACP may influence the care that people receive (7-12). These studies  
26  
27 have been conducted in a range of sectors, including hospitals, residential aged care facilities,  
28  
29 general practices and the community. Various research methodologies have been used to  
30  
31 understand ACP prevalence, including retrospective audits of health records; interviews; and  
32  
33 surveys of service providers, service users and families (13-21).  
34  
35

36  
37  
38 The lack of standardised, national data relating to ACP prevalence in Australia means that  
39  
40 there is a lack of evidence to assist organisations and government to understand the impact of  
41  
42 ACP initiatives. A search of literature between 2010 and 2016 has identified that the largest  
43  
44 international sample size in a retrospective prevalence study assessing ACP practice was  
45  
46 undertaken in 2015 in the USA with the sample of 24,291 people over five years. It found  
47  
48 ACP prevalence of 12.7% (22). A large Australian sample size (2,764 people) in a  
49  
50 prospective prevalence study was described by Nair (17) in 2000 in the Hunter region of New  
51  
52 South Wales, with very low levels (0.2%) of formal ACDs found. A prospective survey of  
53  
54 3,055 participants in South Australia found that 46% of the study participants had completed  
55  
56 an ACD (20). The first attempt to conduct a national prevalence study in Australia was made  
57  
58  
59  
60



1  
2  
3 by White et al (21). This self-report study included 2,405 community participants across all  
4  
5 jurisdictions of whom only 14% had completed ACDs.  
6

7  
8 The majority of the Australian studies were self-reports, limited to single-settings, and did not  
9  
10 examine patterns of ACP across multiple sectors and jurisdictions. There is a gap in evidence  
11  
12 regarding ACP documentation and self-reported uptake nationally. This research undertaken  
13  
14 by Advance Care Planning Australia in partnership with Monash University, will be the first  
15  
16 prospective study to undertake a coordinated assessment of the national prevalence of ACP  
17  
18 uptake, and documentation in hospitals, residential aged care facilities and general practices  
19  
20 using a standardised approach to data collection.  
21  
22

23  
24 This will be a pilot study aiming to examine the feasibility of an approach that is intended to  
25  
26 ultimately be used in a large scale prevalence study in future. The results will inform future  
27  
28 steps toward improved ACP data collection methodology, ACP implementation strategies  
29  
30 and evaluation processes. We anticipate that the results from this study will act as a baseline  
31  
32 for future national ACP prevalence studies.  
33  
34

### 35 36 **Aims and hypotheses**

37  
38 The specific aims of this study are to: 1) determine the prevalence of ACP documentation in  
39  
40 paper and/or electronic health records of people aged 65 years or more in hospitals,  
41  
42 residential aged care facilities and general practices, 2) assess the quality, validity and  
43  
44 variation of the ACP documentation across different sectors and jurisdictions, 3) explore  
45  
46 peoples' views on ACP, and self-reported ACP uptake; and 4) explore whether clinical care  
47  
48 plans and medical orders developed for the person are consistent with their documented  
49  
50 preferences for care.  
51  
52

53  
54 We hypothesise that the prevalence of ACP documentation will be low and consistent with  
55  
56 that identified by White et al (21), and that more people will have an ACD appointing a  
57  
58  
59  
60

1  
2  
3 substitute decision-maker than an ACD (or similar document) outlining their preferences for  
4 care. In regards to aim 2 we hypothesise that the ACP documentation will be signed by the  
5 person making the document, and witnessed according to the legislative requirements in each  
6 of the jurisdictions for formal ACDs, but there will be issues with validity of the documents  
7 based on failure to meet the witnessing requirements (23). In regards to aim 3 we hypothesize  
8 that there will be discrepancies between peoples' self-reported completion of ACP  
9 documentation, and their presence in the audited records. In regards to aim 4 we hypothesize  
10 that there will be discrepancies between a person's ACD and their clinical care plans and  
11 medical orders.  
12  
13  
14  
15  
16  
17  
18  
19  
20  
21  
22

## 23 **Outcomes**

24  
25  
26 The primary outcome of this study will be ACP prevalence, and this is measured by the  
27 number of people who have ACP documentation that can be located in their records within  
28 15 minutes of opening the record. Secondary outcomes include the type, quality and validity  
29 of ACP documentation, peoples' self-reported views on ACP and ACP uptake, and  
30 consistency between ACP documentation and clinical care plans and medical orders.  
31  
32  
33  
34  
35  
36  
37

## 38 **METHODS AND ANALYSIS**

### 39 **Study design and population**

40  
41  
42 This national multicentre prospective cross-sectional prevalence pilot study consists of two  
43 parts: 1) an audit of person's records and 2) a survey of those people whose records were  
44 audited. It will be conducted among people admitted to hospital, residing in residential aged  
45 care facilities or attending general practices in Australia.  
46  
47  
48  
49  
50  
51  
52

53  
54 Fifty records will be audited in each of 49 Australian organisations (expected sample of 2450  
55 records). Participating organisations (hospitals, residential aged care facilities and general  
56 practices) will be recruited through an expressions of interest process. It is expected that at  
57  
58  
59  
60

1  
2  
3 least 49 organisations distributed across the eight Australian jurisdictions and the three  
4  
5 settings, will participate in this study. Expression of interest applications will be assessed on  
6  
7 each organisation's commitment to the project deliverables and ability to audit the required  
8  
9 50 records (Table 1).  
10

11  
12 *[Table 1 here please]*  
13

14  
15 Successful organisations will receive funding to cover staff costs required to participate in the  
16  
17 study. Organisations responding to the expression of interest will be required to nominate  
18  
19 three staff members who have experience in retrieving information from health records, can  
20  
21 assist participants to complete the survey where necessary, and are available to answer  
22  
23 questions from participants about ACP, or refer them to their health care team. It is expected  
24  
25 that data collectors may be quality managers, nurses or allied health professionals such as  
26  
27 social workers.  
28  
29

30  
31 Data collectors will receive a training manual with jurisdictional specific information, and  
32  
33 will undertake 90-minutes of online training on conducting the record audit and surveys. A  
34  
35 sample of two health records will be provided for the extraction of the data prior the study to  
36  
37 ensure the concordance amongst the data collectors. A short questionnaire will be provided to  
38  
39 assess staff's knowledge and skills. Prior to actually undertaking the study, data collectors  
40  
41 will be provided with the training manual and a list of frequently asked questions about the  
42  
43 data collection tools. On the day(s) of the study, investigators will be available to answer the  
44  
45 questions and queries from data collectors. To test the processes and feasibility of the study  
46  
47 design, and data collection tools, and to identify potential problems that might arise we will  
48  
49 conduct a trial of the audit with three staff and approximately fifteen participants at the lead  
50  
51 site. Each organisation will use their information management system or database to provide  
52  
53 the research team with a list of patient/client records that meet eligibility criteria. The study  
54  
55  
56  
57  
58  
59  
60

1  
2  
3 sample will comprise people aged 65 years or more admitted to hospitals, residential aged  
4 care facilities or visiting general practice. Inclusion and exclusion criteria for Part 1 (audit)  
5 and 2 (survey) are listed in Table 2.  
6  
7  
8

9  
10 *[Table 2 here please]*  
11

12  
13 A lower age cut off (50 years or more) has been applied for Aboriginal and Torres Strait  
14 Islander people to reflect planning for aged care services in this population (24).  
15  
16

### 17 18 **Part 1. Records audit** 19

#### 20 21 *Recruitment* 22

23  
24 At hospitals and residential aged care facilities data collector/(s) will contact the  
25 organisation's Health Information Management team (or similar) to obtain a list of current  
26 inpatients or residential clients who meet the study eligibility criteria (Table 2). The list will  
27 only contain the person's unique record number. All other identifiable details will be  
28 removed.  
29  
30  
31  
32  
33

#### 34 35 *Randomization* 36

37  
38 Each hospital and residential aged care facility will transmit their eligible inpatient/client list  
39 through a secure file transfer protocol to Monash University where a random number  
40 generator will select records in each centre for review.  
41  
42  
43  
44

45  
46 Following simple randomization procedures each record number will be randomly assigned  
47 to two groups: group one ("to include to the audit") or group two ("not to include to the  
48 audit"). Only those randomised to group one will be included in the study. The "Research  
49 Randomizer" (www.randomizer.org) software solution will be used to undertake this task. A  
50 total of 60 records will be provided; the first 50 to be utilised for the purposes of the study,  
51 and the final 10 (supplementary list) to be utilised on an as needed basis if any of the first 50  
52  
53  
54  
55  
56  
57  
58  
59  
60

1  
2  
3 records are not able to be accessed for any reason (e.g. patient discharge occurring in the  
4  
5 period between producing the list and accessing the record).  
6  
7

8 Data collectors will start auditing once they receive audit and supplementary lists.  
9

10 For practicality purposes random sampling will not be performed in general practices.  
11

12 Records of the first 50 eligible people visiting the practice on the specified day(s) and  
13  
14 meeting the selection criteria will be included in the audit.  
15  
16

### 17 *Data collection* 18

19  
20 Data collectors will obtain selected paper and/or electronic records. Data collection will be  
21  
22 carried out using either a paper-based or electronic data collection tool specifically designed  
23  
24 for this study (Supplementary Table 1). Although advance care plans and ACDs are used in  
25  
26 all Australian jurisdictions, the terminology, format, documentation requirements, how the  
27  
28 ACD applies and the hierarchy of decision-makers differ from state to state (4, 25, 26). Data  
29  
30 collectors will be given training material with information, terminology and definitions  
31  
32 relevant to their jurisdictions.  
33  
34  
35  
36

37 Data collectors will attempt to locate ACP documentation within 15 minutes, and if the ACP  
38  
39 documentation is not found, they will stop searching for ACP documentation and move on to  
40  
41 answering other audit items, such as demographic information. The timeframe of 15 minutes  
42  
43 will commence when the paper and/or electronic record becomes available. It is anticipated  
44  
45 that the total time for the audit will take between 30 and 45 minutes to extract data from each  
46  
47 record.  
48  
49

### 50 *Data de-identification* 51

52 A study number will be assigned to each person on the audit list. This study number will be  
53  
54 entered onto the data collection form. Identifiable information such as name, or date of birth  
55  
56  
57  
58  
59  
60

1  
2  
3 will not be recorded. Data collectors will generate a separate list containing the study number  
4  
5 and person's name. This list will be used to identify potential participants for the second  
6  
7 component of the study (the survey). The list with identifying information will remain at the  
8  
9 participating organisation and will not be disclosed to the research team.  
10

## 11 12 **Part 2. The survey**

13  
14  
15 The survey will be undertaken to explore the person's understanding and experience of ACP  
16  
17 and identify their preferences for care. The questions for the survey were based on examples  
18  
19 from other ACP prevalence surveys found during the literature review. Despite limitations  
20  
21 surveys have in collecting sensitive data on person's experiences, they are widely used in  
22  
23 medical research and are suitable for gathering data about abstract ideas or concepts that are  
24  
25 otherwise difficult to quantify, such as opinions, attitudes and beliefs (27). Administration of  
26  
27 the survey requires minimal resources, and the results arising from analysis of closed-ended  
28  
29 responses can be easily compared with the findings from the records audit. We hypothesize  
30  
31 that there will be differences between the record audit and the survey responses regarding the  
32  
33 existence of ACDs.  
34  
35  
36

### 37 38 *Recruitment*

39  
40  
41 All people from participating organisations whose files are audited are suitable for inclusion  
42  
43 in Part 2 of this project, providing they meet the eligibility criteria outlined in Table 2.  
44

45  
46 Individuals lacking decision-making capacity will be excluded from the survey.  
47

### 48 49 *Informed consent*

50  
51 Data collectors will explain the study and provide participants with the Explanatory  
52  
53 Statement and Consent Form. The person's capacity to give consent will be judged on the  
54  
55 day(s) of the study by a nurse or other clinician in hospitals/residential aged care facilities, or  
56  
57 by a nurse/doctor/other clinician in general practice, based on established principles of  
58  
59  
60

1  
2  
3 informed consent (28). As some of the questions will ask about the end-of-life issues and  
4  
5 death, there is a small chance that participants might experience distress or concern during  
6  
7 the survey. To address this respondents are offered telephone numbers of relevant support  
8  
9 services in the Explanatory Statement.  
10

#### 11 12 *Data collection*

13  
14 Those who consent will be provided with a paper or electronic survey presented on a tablet or  
15  
16 laptop (Supplementary Table 2). Participants can complete this survey themselves, or ask for  
17  
18 help from the data collector. It is anticipated that a person will take between 20 and 30  
19  
20 minutes to complete the survey. If participants complete a paper-based survey, data collectors  
21  
22 will enter the data electronically at a later time.  
23  
24  
25

#### 26 27 *Data de-identification*

28  
29 Identifiable information will not be collected. Each participant will be assigned a study  
30  
31 number which will be entered and stored electronically. This will be the same number which  
32  
33 was generated during the record audit.  
34  
35  
36

#### 37 **Variables**

38  
39 The list of variables to be collected during the study is detailed in Table 3.  
40  
41

42  
43 *[Table 3 here please]*  
44  
45

#### 46 *Part 1. Records audit*

47  
48 Data extracted from the person's record will include: 1) demographic characteristics, 2)  
49  
50 clinical information, 3) information on the ACP documentation, 4) person's preferences  
51  
52 regarding their care, and 5) medically driven orders.  
53  
54

#### 55 56 *Part 2. The survey*

1  
2  
3 The following information will be collected during the surveys: 1) demographic  
4 characteristics, 2) generic quality of life and health status using EQ-5D five dimensions  
5 questionnaire (chosen because it has been extensively validated and shown to be sensitive,  
6 internally consistent, and reliable (29)), 3) knowledge and experience regarding ACP, and 4)  
7 self-reported use of ACP documentation (i.e. participants will be asked whether they have  
8 documented their values and beliefs or preferences for future care, how this documentation is  
9 stored, and whether they have legally appointed a substitute decision-maker).

### 19 **Population size**

21 While a sample size justification is important for pilot and feasibility trials, a formal sample  
22 size calculation may not be appropriate (30). Based on assumptions and findings from  
23 previous research, we have chosen a sample 50 people from each organisation, with an  
24 expected total sample size of 2450 records (31). This will yield a comparison of data of at  
25 least 800 people's records per sector. Estimated precision and confidence intervals of the  
26 chosen sample are shown in Table 4. Based on the previous knowledge of 14% of the  
27 Australian population having an ACP/ACD (21), the 95% confidence limits for the sample of  
28 50 people would range from 3 to 22%.

39  
40 *[Table 4 here please]*

### 43 **Data processing**

#### 46 *Data management*

49 All data collected during this study will be stored on a cloud-based database specifically  
50 designed for this project. Cloud-based storage will ensure customized data security control  
51 for each organization and is suitable for distributed collection environments. The database  
52 will have in-built validation and range checks to reduce data collection errors.



1  
2  
3 Participants completing the survey and data collectors completing the audit may access the  
4  
5 web-based record audit tool and survey on a personal computer, laptop or tablet.  
6

7 Organisations will need internet access in order to access the cloud-based database and data  
8  
9 collection forms. The research team will also make paper-based forms available for people  
10  
11 (organisations and those completing the survey) who have limited computer access, or are not  
12  
13 comfortable with using digital technologies.  
14

### 15 16 17 *Statistical analysis*

18  
19 Descriptive statistics will be calculated for the total sample of the study and will be stratified  
20  
21 by major grouping variables: organisation type, state, location, age, sex, ethnicity, diagnosis,  
22  
23 functional status and outcomes.  
24

25  
26 Data collectors will judge ACP documentation to be present if they find evidence of any ACP  
27  
28 documentation of the person's preferences (either formal or informal), or legal appointment  
29  
30 of a substitute decision-maker by the person within 15 minutes. Presence of ACP  
31  
32 documentation, such as ACDs and advance care plans will be described using the mode,  
33  
34 frequency, and distribution of the respective categories. There is no standard measure for  
35  
36 quality and validity of ACP documentation in Australia. Statutory documents need to be  
37  
38 signed by the person and witnessed by specific authorities such as a doctor, a legal  
39  
40 practitioner, a Justice of the Peace and in some jurisdictions also by the appointed decision-  
41  
42 maker. Unsigned documents are not legally valid, and therefore presence or absence of such  
43  
44 signatures will be used to determine the validity of the ACP documentation. Comparisons  
45  
46 will be made using *t-tests* for the continuous type variables and *chi-square* contingency table  
47  
48 analysis for the categorical type variables.  
49  
50  
51  
52

53  
54 Data collectors will also look for other evidence of ACP discussions, such as a note in the  
55  
56 person's record, recording on a limitation of treatment form which clearly states the decision  
57  
58  
59  
60

1  
2  
3 is based on the person's preferences, or other documentation of a person's preferences, but  
4  
5 where a statutory or non-statutory ACD has not been completed. These will be reported as  
6  
7 descriptive data.  
8  
9

10 Multivariate logistic regression will be performed, predicting the presence of ACP  
11  
12 documentation while controlling for the type of organisation, jurisdictions, location, age, sex  
13  
14 and ethnicity. In instances where data are missing, analysis will be performed using list-wise  
15  
16 deletion. The level of significance will be set at 0.05.  
17  
18

### 19 **Project governance**

20  
21  
22 The ACP prevalence study will be overseen by a project Advisory Group. This group will  
23  
24 meet bimonthly for the initial 12-month period. Members of the Advisory Group will include  
25  
26 representatives from Advance Care Planning Australia, Monash University, Australian  
27  
28 Institute of Health and Welfare, jurisdictions, and members of the hospital, aged care and  
29  
30 general practice sectors. The Advisory Group will be responsible for reviewing and endorsing  
31  
32 the project methodology, advertising the expression of interest to the settings, advising on  
33  
34 barriers or enablers to conducting this research within their relevant sector and/or  
35  
36 jurisdictions including risk management; and reviewing prevalence study findings and reports.  
37  
38  
39

### 40 **ETHICS AND DISSEMINATION**

41  
42  
43 This research protocol for this study was approved on the 2<sup>nd</sup> May 2017 by Austin Health  
44  
45 Human Research Ethics Committee (reference number: HREC/17/Austin/83). The  
46  
47 anticipated date for completion of the study is the 31<sup>st</sup> December 2017.  
48  
49

50  
51 Results of this study will be provided to the participating organisations and the Australian  
52  
53 Government. No reports will identify any specific organisation but jurisdictional comparisons  
54  
55 will be possible. Findings will be presented at relevant conferences and published in peer-  
56  
57 reviewed journals, on the Advance Care Planning Australia website and in lay and social  
58  
59  
60

1  
2  
3 media where appropriate. The investigators will review drafts of the manuscripts, abstracts,  
4  
5 press releases and any other publications arising from the study. Authorship will be  
6  
7 determined in accordance with the International Committee of Medical Journal Editors  
8  
9 guidelines, and other contributors will be acknowledged.  
10

11  
12 The results will be highly relevant to clinical practice and policy nationally and  
13  
14 internationally; therefore the findings of this study will also be disseminated through relevant  
15  
16 government departments, as well as through various national and international professional  
17  
18 bodies, societies and peer review networks.  
19

### 20 21 22 **Supplementary documents**

- 23  
24 1. Supplementary Table 1 – Records audit tool
- 25  
26 2. Supplementary Table 2 – Survey
- 27  
28  
29

### 30 31 **Funding**

32  
33 This program is supported by funding from the Australian Government as a part of a  
34  
35 Specialist Palliative Care and Advance Care Planning Advisory Service Program.  
36  
37

### 38 39 **Authors' contributions**

40  
41 RR acted as a principal investigator and contributed to the concept, drafting, design and  
42  
43 revising of the protocol. KD contributed to the concept, drafting, design and critically  
44  
45 revising of the protocol. SE contributed to the design and critically revising the protocol. VP  
46  
47 contributed to the design and critically revising the protocol. CS contributed to the concept,  
48  
49 design and critically revising the protocol. JC contributed to the concept and design of the  
50  
51 protocol. LN conceived the study and contributed to the concept and critically revising of the  
52  
53 protocol.  
54  
55

### 56 57 58 **Competing interests**

None

For peer review only

1  
2  
3  
4  
5  
6  
7  
8  
9  
10  
11  
12  
13  
14  
15  
16  
17  
18  
19  
20  
21  
22  
23  
24  
25  
26  
27  
28  
29  
30  
31  
32  
33  
34  
35  
36  
37  
38  
39  
40  
41  
42  
43  
44  
45  
46  
47  
48  
49  
50  
51  
52  
53  
54  
55  
56  
57  
58  
59  
60

**REFERENCES**

1. Sudore RL, Lum HD, You JJ, Hanson LC, Meier DE, Pantilat SZ, et al. Defining Advance Care Planning for Adults: A Consensus Definition from a Multidisciplinary Delphi Panel. *Journal of pain and symptom management*. 2017.
2. The Australian Commission of Quality and Safety in Health Care. The National Consensus Statement: Essential elements for safe and high-quality end-of-life care [cited 2016 (accessed Nov 2016)].
3. Detering K. Accessibility of Advance Care Plans in Victoria – A Summary Options Paper. Melbourne: Advance Care Planning Australia, 2017.
4. Carter RZ, Detering KM, Silvester W, Sutton E. Advance care planning in Australia: what does the law say? *Australian health review : a publication of the Australian Hospital Association*. 2016.
5. Australian Health Ministers' Advisory Council. Clinical, Technical and Ethical Principal Committee (issuing body). A national framework for advance care directives. Canberra Australian Health Ministers' Advisory Council, 2011.
6. Victorian Government. Advance care planning: have the conversation. A strategy for Victorian health services 2014-2018. State of Victoria, Department of Health 2014.
7. Ashby MA, Thornton RN, Thomas RL. Advance care planning: lessons from a study of Tasmanian enduring guardianship forms. *The Medical journal of Australia*. 2013;198(4):188-9.
8. Bischoff KE, Sudore R, Miao Y, Boscardin WJ, Smith AK. Advance care planning and the quality of end-of-life care in older adults. *Journal of the American Geriatrics Society*. 2013;61(2):209-14.

- 1  
2  
3 9. Brunner-La Rocca HP, Rickenbacher P, Muzzarelli S, Schindler R, Maeder MT, Jeker  
4 U, et al. End-of-life preferences of elderly patients with chronic heart failure. *European Heart*  
5 *Journal*. 2012;33(6):752-9.  
6  
7
- 8  
9 10. Carr D. "I don't want to die like that ...": the impact of significant others' death quality  
10 on advance care planning. *The Gerontologist*. 2012;52(6):770-81.  
11  
12
- 13 11. Laakkonen ML, Pitkala KH, Strandberg TE, Berglind S, Tilvis RS. Living will,  
14 resuscitation preferences, and attitudes towards life in an aged population. *Gerontology*.  
15 2004;50(4):247-54.  
16  
17
- 18 12. Volker DL, Divin-Cosgrove C, Harrison T. Advance directives, control, and quality  
19 of life for persons with disabilities. *Journal of palliative medicine*. 2013;16(8):971-4.  
20  
21
- 22 13. Bezzina AJ. Prevalence of advance care directives in aged care facilities of the  
23 Northern Illawarra. *Emergency medicine Australasia : EMA*. 2009;21(5):379-85.  
24  
25
- 26 14. Cheang F, Finnegan T, Stewart C, Hession A, Clayton JM. Single-centre cross-  
27 sectional analysis of advance care planning among elderly inpatients. *Internal medicine*  
28 *journal*. 2014;44(10):967-74.  
29  
30
- 31 15. Kirkpatrick JN, Guger CJ, Arnsdorf MF, Fedson SE. Advance directives in the  
32 cardiac care unit. *American Heart Journal*. 2007;154(3):477-81.  
33  
34
- 35 16. Milnes S, Orford NR, Berkeley L, Lambert N, Simpson N, Elderkin T, et al. A  
36 prospective observational study of prevalence and outcomes of patients with Gold Standard  
37 Framework criteria in a tertiary regional Australian Hospital. *BMJ supportive & palliative*  
38 *care*. 2015.  
39  
40
- 41 17. Nair B, Kerridge I, Dobson A, McPhee J, Saul P. Advance care planning in residential  
42 care. *Australian and New Zealand journal of medicine*. 2000;30(3):339-43.  
43  
44
- 45 18. Street M, Ottmann G, Johnstone MJ, Considine J, Livingston PM. Advance care  
46 planning for older people in Australia presenting to the emergency department from the  
47  
48  
49  
50  
51  
52  
53  
54  
55  
56  
57  
58  
59  
60

- 1  
2  
3 community or residential aged care facilities. Health & social care in the community.  
4  
5 2015;23(5):513-22.  
6  
7 19. Wheatley E, Huntington MK. Advanced directives and code status documentation in  
8 an academic practice. Family medicine. 2012;44(8):574-8.  
9  
10 20. Bradley SL, Woodman RJ, Tieman JJ, Phillips PA. Use of advance directives by  
11 South Australians: results from the Health Omnibus Survey Spring 2012. The Medical  
12 journal of Australia. 2014;201(8):467-9.  
13  
14 21. White B, Tilse C, Wilson J, Rosenman L, Strub T, Feeney R, et al. Prevalence and  
15 predictors of advance directives in Australia. Internal medicine journal. 2014;44(10):975-80.  
16  
17 22. Butler J, Binney Z, Kalogeropoulos A, Owen M, Clevenger C, Gunter D, et al.  
18 Advance directives among hospitalized patients with heart failure. JACC Heart failure.  
19 2015;3(2):112-21.  
20  
21 23. Detering K, Carter R, Sellars M, Lewis E, Sutton E. A prospective comparative  
22 effectiveness cohort study, comparing two models of advance care planning provision for  
23 Australian community aged care clients. BMJ supportive & palliative care. 2017;in press.  
24  
25 24. Grove A. Research paper series, 206-17. Aged Care: a quick guide. Parliament of  
26 Australia. Department of Parliamentary Services; 2016.  
27  
28 25. Haysom G. Review of the National Registration and Accreditation Scheme for health  
29 practitioners. Aus Health Law Bulletin. 2015;23(1):12-5.  
30  
31 26. White B, Wilmott L, Trowse P, Parker M, Cartwright C. The legal role of medical  
32 professionals in decisions to withhold or withdraw life-sustaining treatment : Part 1 (New  
33 South Wales). J Law Med. 2011;18(3):498-522.  
34  
35 27. Krosnick JA. Survey research. Annual review of psychology. 1999;50:537-67.  
36  
37  
38  
39  
40  
41  
42  
43  
44  
45  
46  
47  
48  
49  
50  
51  
52  
53  
54  
55  
56  
57  
58  
59  
60

- 1  
2  
3 28. Australian Government. National Health and Medical Research Council. National  
4 Statement on Ethical Conduct in Human Research (2007) (Updated May 2015).  
5  
6  
7 www.nhmrc.gov.au/book/national-statement-ethical-conduct-human-research.  
8  
9  
10 29. Rabin R, de Charro F. EQ-5D: a measure of health status from the EuroQoL Group.  
11 Ann Med. 2001;33:337-3423.  
12  
13  
14 30. Billingham SA, Whitehead AL, Julious SA. An audit of sample sizes for pilot and  
15 feasibility trials being undertaken in the United Kingdom registered in the United Kingdom  
16 Clinical Research Network database. BMC medical research methodology. 2013;13:104.  
17  
18  
19  
20 31. Sim J, Lewis M. The size of a pilot study for a clinical trial should be calculated in  
21 relation to considerations of precision and efficiency. Journal of clinical epidemiology.  
22 2012;65(3):301-8.  
23  
24  
25  
26  
27  
28  
29  
30  
31  
32  
33  
34  
35  
36  
37  
38  
39  
40  
41  
42  
43  
44  
45  
46  
47  
48  
49  
50  
51  
52  
53  
54  
55  
56  
57  
58  
59  
60



**TABLES****Table 1** Assessment criteria for organisations expressing their interest in the study

- Have the approval and endorsement of their executive team
- Be an accredited organisation according to the sector requirements
- Must have access to IT and devices for online data collection (i.e. computer, laptop or tablet)
- Must have Internet, e-mail and telephone access.
- Have a patient/client information management system with the ability to extract the list of all admissions of persons aged 65 years or more admitted to hospital or residential aged care facility for more than 48 hours at the time of the study
- Have the capacity to review a minimum of 30 files/records and administer a minimum of 30 surveys in the nominated time period.
- Have staff with the capacity to undertake up to three hours online training prior to study.
- Have appropriately skilled staff to assess a person's decision-making capacity.
- Have appropriately skilled staff who are available to answer questions about ACP.
- Have policies in place about privacy and confidentiality.
- Be willing to accept retrospective payment for involvement in this study.
- Be willing to sign a service agreement.
- Gain site specific approval within four to six weeks of notification of successful application.

*ACP – advance care planning; IT – information technology*

**Table 2** Overview of inclusion and exclusion criteria for the study participants

| <b>Inclusion criteria</b>                                                              |                                                     |
|----------------------------------------------------------------------------------------|-----------------------------------------------------|
| <b>Part 1. Records audit</b>                                                           | <b>Part 2. Survey</b>                               |
| Males and females                                                                      | Everybody included in Part 1                        |
| ≥65 years of age (≥50 years for ATSI people)                                           | English-speaking                                    |
| For hospitals and residential aged care facilities: admitted for >48 hours             | Able to consent                                     |
| For general practices: visiting general practice on the nominated day/(s) of the study |                                                     |
| <b>Exclusion criteria</b>                                                              |                                                     |
| <b>Part 1. Records audit</b>                                                           | <b>Part 2. Survey</b>                               |
| <65 years of age (<50 years for ATSI people)                                           | Non-English speaking                                |
| People admitted to the ICU                                                             | People who do not have decision-making capacity     |
| People in maternal/obstetric wards                                                     | People unable to or electing not to provide consent |
| People in mental health units                                                          | People expected to die within 24 hours              |
| For hospitals and residential aged care facilities: admitted for <48 hours             |                                                     |

*ATSI – Aboriginal and Torres Strait Islander peoples; ICU – intensive care unit*

Table 3 Data variables collected during the study

| Part 1. Records audit       |                               | Part 2. Survey              |                                                |
|-----------------------------|-------------------------------|-----------------------------|------------------------------------------------|
| Category                    | Variable                      | Category                    | Variable                                       |
| <b>Organisation</b>         |                               | <b>Demographics</b>         |                                                |
|                             | Name                          |                             | Age                                            |
|                             | Type                          |                             | Sex                                            |
|                             | State                         |                             | Country of birth                               |
|                             | Size                          |                             | Aboriginal status                              |
| <b>Demographics</b>         |                               |                             | Ethnicity                                      |
|                             | Age                           |                             | Religion                                       |
|                             | Sex                           |                             | Language spoken                                |
|                             | Postcode                      |                             | Relationship status                            |
|                             | Country of birth              |                             | Education                                      |
|                             | Aboriginal status             |                             | Level of support                               |
|                             | Ethnicity                     | <b>Health status/ EQ-5D</b> |                                                |
|                             | Religion                      |                             | Mobility                                       |
|                             | Language spoken               |                             | Usual activities                               |
|                             | Date of admission/visit       |                             | Self-care                                      |
|                             | Came from                     |                             | Pain-discomfort                                |
|                             | Medical condition             |                             | Anxiety/depression                             |
|                             | ECOG status                   | <b>Knowledge</b>            |                                                |
| <b>Documentation</b>        |                               |                             | Knowledge of ACP                               |
|                             |                               |                             | Previous discussions                           |
|                             |                               |                             | Barriers and enablers                          |
|                             |                               |                             | Personal preferences                           |
|                             | Ability to find in 15 minutes |                             | Readiness for ACP                              |
|                             | Date of the document          |                             | Future worries/wishes                          |
|                             |                               |                             | Legal appointment of substitute decision maker |
|                             | Time taken to find            | <b>Evidence</b>             |                                                |
|                             | Location of the document      |                             | Evidence of ACP documentation                  |
|                             | Name, type and other details  |                             |                                                |
| <b>Person's preferences</b> |                               |                             |                                                |

1  
2  
3 Life prolonging treatment type

4 Treatment to extend life

5 Comfort/palliative care

6 Other preferences

7 Place of care and/or death

8  
9  
10 **Medical orders**

11 Limitations of medical treatment

12 Palliative/comfort care

13 Other orders

14 Consistency with person's wishes

15  
16  
17 *ECOG - Eastern Cooperative Oncology Group*

**Table 4** Precision of positive predictive value of ACP/ACD documentation estimates

| Proportion of records with<br>ACP/ACD (%) | Records reviewed<br>at site level (N) | 95% CI    | Records reviewed<br>at sector level (N) | 95% CI    |
|-------------------------------------------|---------------------------------------|-----------|-----------------------------------------|-----------|
| 0.95                                      | 50                                    | 0.83-0.99 | 800                                     | 0.93-0.96 |
| 0.9                                       | 50                                    | 0.78-0.97 | 800                                     | 0.87-0.92 |
| 0.8                                       | 50                                    | 0.66-0.90 | 800                                     | 0.77-0.83 |
| 0.7                                       | 50                                    | 0.55-0.82 | 800                                     | 0.67-0.73 |
| 0.6                                       | 50                                    | 0.45-0.74 | 800                                     | 0.56-0.63 |
| 0.5                                       | 50                                    | 0.36-0.64 | 800                                     | 0.46-0.54 |
| 0.4                                       | 50                                    | 0.26-0.55 | 800                                     | 0.37-0.43 |
| 0.3                                       | 50                                    | 0.18-0.45 | 800                                     | 0.27-0.33 |
| 0.2                                       | 50                                    | 0.10-0.34 | 800                                     | 0.17-0.23 |
| 0.1                                       | 50                                    | 0.03-0.22 | 800                                     | 0.08-0.12 |
| 0.05                                      | 50                                    | 0.01-0.17 | 800                                     | 0.04-0.07 |
| 0.02                                      | 50                                    | 0.00-0.11 | 800                                     | 0.00-0.03 |

*ACD – advance care directive; ACP – advance care planning*

## GENERIC HEALTH RECORD REVIEW FORM

**Study ID number**

**Study site**

**Date form completed** \_\_\_ / \_\_\_ / \_\_\_

### SECTION 1. TYPE AND PLACE OF DOCUMENTATION

|                                                                                                                                                                 |                                                                                                                                                                                                                                                                                |                                                      |
|-----------------------------------------------------------------------------------------------------------------------------------------------------------------|--------------------------------------------------------------------------------------------------------------------------------------------------------------------------------------------------------------------------------------------------------------------------------|------------------------------------------------------|
| <p><b>1. Can you find any Advance Care Planning (ACP) documentation regarding health and personal care and preferred health outcomes within 15 minutes?</b></p> | <p><input type="checkbox"/> Yes (If YES, please complete the date of most recent documentation)</p> <p><input type="checkbox"/> No (If NO, go to Section 2)</p>                                                                                                                | <p>Date of most recent documentation ___/___/___</p> |
| <p><b>2. How long did it take you to find the ACP documentation?</b></p>                                                                                        | <p><input type="checkbox"/> Less than 5 minutes</p> <p><input type="checkbox"/> 5-10 minutes</p> <p><input type="checkbox"/> 10-15 minutes</p>                                                                                                                                 |                                                      |
| <p><b>3. Where did you find the ACP documentation? (please tick all that apply)</b></p>                                                                         | <p><input type="checkbox"/> Paper record</p> <p><input type="checkbox"/> Electronic record</p>                                                                                                                                                                                 |                                                      |
| <p><b>4. In which section of the record did you find the ACP documentation? (please tick all that apply)</b></p>                                                | <p><input type="checkbox"/> Specified area for ACP documentation</p> <p><input type="checkbox"/> Legal section</p> <p><input type="checkbox"/> Notes section</p> <p><input type="checkbox"/> My Health Record</p> <p><input type="checkbox"/> Other (please specify) _____</p> |                                                      |
| <p><b>5. What type of documentation did you find? (please tick all that apply)</b></p>                                                                          | <p><input type="checkbox"/> Statutory ACD - preferences for care (if YES please go to Question 6)</p> <p><input type="checkbox"/> Statutory ACD - SDM appointed by the person (If YES, please go to Question 7)</p>                                                            |                                                      |

- 1  
2  
3  
4  
5  
6  
7  
8  
9  
10  
11  
12  
13  
14  
15  
16  
17  
18  
19  
20  
21  
22  
23  
24  
25  
26  
27  
28  
29  
30  
31  
32  
33  
34  
35  
36  
37  
38  
39  
40  
41  
42  
43  
44  
45  
46  
47
- |  |                                                                                                                                                                                                                                                                                                                                                                                                                                                                                                                                                                                                                                                                                                                                                                                                                                                                                                                                                                                                                                                                                                                                                                                                                                                                                                                                                                                                                                                                                                                                                                                                                                                                                                                                                                                                                                                                                                                                                                                                                                                                                                                                                            |
|--|------------------------------------------------------------------------------------------------------------------------------------------------------------------------------------------------------------------------------------------------------------------------------------------------------------------------------------------------------------------------------------------------------------------------------------------------------------------------------------------------------------------------------------------------------------------------------------------------------------------------------------------------------------------------------------------------------------------------------------------------------------------------------------------------------------------------------------------------------------------------------------------------------------------------------------------------------------------------------------------------------------------------------------------------------------------------------------------------------------------------------------------------------------------------------------------------------------------------------------------------------------------------------------------------------------------------------------------------------------------------------------------------------------------------------------------------------------------------------------------------------------------------------------------------------------------------------------------------------------------------------------------------------------------------------------------------------------------------------------------------------------------------------------------------------------------------------------------------------------------------------------------------------------------------------------------------------------------------------------------------------------------------------------------------------------------------------------------------------------------------------------------------------------|
|  | <ul style="list-style-type: none"><li><input type="checkbox"/> Interstate statutory ACD - preferences for care<ul style="list-style-type: none"><li><input type="checkbox"/> <i>ACT: Health Direction</i></li><li><input type="checkbox"/> <i>NT: Direction Under Natural Death Act (prior to 17/03/2014)</i></li><li><input type="checkbox"/> <i>NT: Advance Personal Plan (from 18/13/2014)</i></li><li><input type="checkbox"/> <i>QLD: Advance Health Directive</i></li><li><input type="checkbox"/> <i>SA: Anticipatory Direction (prior to 01/07/2014)</i></li><li><input type="checkbox"/> <i>SA: Advance Care Directive (from 02/07/2014)</i></li><li><input type="checkbox"/> <i>TAS: Enduring Guardian (a statutory document that contains information about preferences for care)</i></li><li><input type="checkbox"/> <i>VIC: A Refusal of Treatment Certificate (competent)</i></li><li><input type="checkbox"/> <i>VIC: A Refusal of Treatment Certificate (incompetent)</i></li><li><input type="checkbox"/> <i>WA: Advance Health Directive</i></li></ul></li><li><input type="checkbox"/> Interstate statutory ACD - SDM appointed by the person<ul style="list-style-type: none"><li><input type="checkbox"/> <i>ACT: Enduring Power of Attorney (HealthCare Matters)</i></li><li><input type="checkbox"/> <i>NSW: Enduring Guardian</i></li><li><input type="checkbox"/> <i>NT: Enduring Power of Attorney (prior to 17/03/2014)</i></li><li><input type="checkbox"/> <i>NT: Decision Maker (Healthcare Matters) (from 18/13/2014)</i></li><li><input type="checkbox"/> <i>QLD: Enduring Power of Attorney (Personal Matters)</i></li><li><input type="checkbox"/> <i>SA: Medical Power of Attorney (prior to 01/07/2014)</i></li><li><input type="checkbox"/> <i>SA: Advance Care Directive – Substitute Decision Maker Appointment (from 02/07/2014)</i></li><li><input type="checkbox"/> <i>TAS: Enduring Guardian</i></li><li><input type="checkbox"/> <i>VIC: Enduring Power of Attorney Medical Treatment</i></li><li><input type="checkbox"/> <i>VIC: Enduring Power of Guardianship (prior to 31/08/15)</i></li></ul></li></ul> |
|--|------------------------------------------------------------------------------------------------------------------------------------------------------------------------------------------------------------------------------------------------------------------------------------------------------------------------------------------------------------------------------------------------------------------------------------------------------------------------------------------------------------------------------------------------------------------------------------------------------------------------------------------------------------------------------------------------------------------------------------------------------------------------------------------------------------------------------------------------------------------------------------------------------------------------------------------------------------------------------------------------------------------------------------------------------------------------------------------------------------------------------------------------------------------------------------------------------------------------------------------------------------------------------------------------------------------------------------------------------------------------------------------------------------------------------------------------------------------------------------------------------------------------------------------------------------------------------------------------------------------------------------------------------------------------------------------------------------------------------------------------------------------------------------------------------------------------------------------------------------------------------------------------------------------------------------------------------------------------------------------------------------------------------------------------------------------------------------------------------------------------------------------------------------|

|                                                                                             |                                                                                                                                                                                                                                                                                                                                                                                                                                                     |
|---------------------------------------------------------------------------------------------|-----------------------------------------------------------------------------------------------------------------------------------------------------------------------------------------------------------------------------------------------------------------------------------------------------------------------------------------------------------------------------------------------------------------------------------------------------|
|                                                                                             | <input type="checkbox"/> <i>VIC: Enduring Power of Attorney (Personal Matters) (from 01/09/2015)</i><br><input type="checkbox"/> <i>WA: Enduring Guardian</i><br><input type="checkbox"/> Non-statutory or common law ACD documentation (If YES please go to Question 8)<br><input type="checkbox"/> Other documentation (If YES please go to Question 9) (please specify)                                                                          |
| <p><b>6. Details of the person’s statutory ACD documentation (preferences for care)</b></p> | <input type="checkbox"/> Yes, there is a copy in the record<br><input type="checkbox"/> No – I did not find a copy of a statutory ACD (preferences for care), but the record indicates the person has completed one.<br><input type="checkbox"/> No document or notes (regarding the existence of it) located in the record                                                                                                                         |
|                                                                                             | <p><b>If YES, please specify the name of the document</b></p>                                                                                                                                                                                                                                                                                                                                                                                       |
|                                                                                             | <p><b>Was the document signed</b></p> <input type="checkbox"/> Yes<br><input type="checkbox"/> No (Please proceed to the next question)                                                                                                                                                                                                                                                                                                             |
|                                                                                             | <p><b>Who signed the document? (please tick all that apply)</b></p> <input type="checkbox"/> Person<br><input type="checkbox"/> Doctor<br><input type="checkbox"/> Legal practitioner<br><input type="checkbox"/> Justice of Peace<br><input type="checkbox"/> SDM appointed by the person<br><input type="checkbox"/> Unable to determine<br><input type="checkbox"/> Signatures were not found<br><input type="checkbox"/> Other (please specify) |
|                                                                                             | <input type="checkbox"/> Not Applicable                                                                                                                                                                                                                                                                                                                                                                                                             |
|                                                                                             | <p><b>Is the document signed in accordance with legislation?</b></p> <input type="checkbox"/> Yes                                                                                                                                                                                                                                                                                                                                                   |

1  
2  
3  
4  
5  
6  
7  
8  
9  
10  
11  
12  
13  
14  
15  
16  
17  
18  
19  
20  
21  
22  
23  
24  
25  
26  
27  
28  
29  
30  
31  
32  
33  
34  
35  
36  
37  
38  
39  
40  
41  
42  
43  
44  
45  
46  
47



1  
2  
3  
4  
5  
6  
7  
8  
9  
10  
11  
12  
13  
14  
15  
16  
17  
18  
19  
20  
21  
22  
23  
24  
25  
26  
27  
28  
29  
30  
31  
32  
33  
34  
35  
36  
37  
38  
39  
40  
41  
42  
43  
44  
45  
46  
47

|                                                                               |                                                                                                                                                                                                                                                                                                                                                                                                     |
|-------------------------------------------------------------------------------|-----------------------------------------------------------------------------------------------------------------------------------------------------------------------------------------------------------------------------------------------------------------------------------------------------------------------------------------------------------------------------------------------------|
|                                                                               | <input type="checkbox"/> No<br><input type="checkbox"/> I don't know                                                                                                                                                                                                                                                                                                                                |
| <b>7. Details of the person's statutory ACD – SDM appointed by the person</b> | <input type="checkbox"/> Yes, there is a copy in the record<br><input type="checkbox"/> No - did not find a copy of the statutory ACD (SDM appointed by the person), but the record indicates the person has completed one.<br><input type="checkbox"/> No document or notes (regarding the existence of it) located in the record                                                                  |
|                                                                               | <b>If YES, please specify the name of the document</b>                                                                                                                                                                                                                                                                                                                                              |
|                                                                               | <b>What is the relationship of the substitute decision maker to the person? (Please tick all that apply)</b><br><input type="checkbox"/> Spouse/partner<br><input type="checkbox"/> Child<br><input type="checkbox"/> Sibling<br><input type="checkbox"/> Other family<br><input type="checkbox"/> Friend<br><input type="checkbox"/> Other (please specify)<br><input type="checkbox"/> Not stated |
|                                                                               | <b>Was the document signed?</b><br><input type="checkbox"/> Yes<br><input type="checkbox"/> No (Please proceed to the next question)                                                                                                                                                                                                                                                                |
|                                                                               | <b>Who signed the document? (please tick all that apply)</b><br><input type="checkbox"/> Person<br><input type="checkbox"/> Doctor<br><input type="checkbox"/> Legal practitioner<br><input type="checkbox"/> Justice of Peace                                                                                                                                                                      |

|                                                                          |                                                                                                                                                                                                                                                                                                                                         |
|--------------------------------------------------------------------------|-----------------------------------------------------------------------------------------------------------------------------------------------------------------------------------------------------------------------------------------------------------------------------------------------------------------------------------------|
|                                                                          | <input type="checkbox"/> Appointed decision maker<br><input type="checkbox"/> Unable to determine<br><input type="checkbox"/> Signatures were not found<br><input type="checkbox"/> Other (please specify)                                                                                                                              |
|                                                                          | <input type="checkbox"/> Not Applicable                                                                                                                                                                                                                                                                                                 |
|                                                                          | <p><b>Is the document signed in accordance with legislation?</b></p> <input type="checkbox"/> Yes<br><input type="checkbox"/> No<br><input type="checkbox"/> I don't know                                                                                                                                                               |
| <p><b>8. Details of the person's non-statutory ACD documentation</b></p> | <input type="checkbox"/> Yes, there is a copy<br><input type="checkbox"/> No – I did not find a copy of a non-statutory ACD but the record indicates the person has completed one.<br><input type="checkbox"/> No document or notes (regarding the existence of it) located in the record                                               |
|                                                                          | <p><b>If YES, please specify the name of the document</b></p>                                                                                                                                                                                                                                                                           |
|                                                                          | <p><b>Was the document signed?</b></p> <input type="checkbox"/> Yes<br><input type="checkbox"/> No (Please proceed to the next question)                                                                                                                                                                                                |
|                                                                          | <p><b>Who signed the document? (Please tick all that apply)</b></p> <input type="checkbox"/> Person<br><input type="checkbox"/> Doctor<br><input type="checkbox"/> Legal practitioner<br><input type="checkbox"/> Justice of Peace<br><input type="checkbox"/> Appointed decision-maker<br><input type="checkbox"/> Unable to determine |

1  
2  
3  
4  
5  
6  
7  
8  
9  
10  
11  
12  
13  
14  
15  
16  
17  
18  
19  
20  
21  
22  
23  
24  
25  
26  
27  
28  
29  
30  
31  
32  
33  
34  
35  
36  
37  
38  
39  
40  
41  
42  
43  
44  
45  
46  
47

|                                                                                                          |                                                                                                                                                                                                                                                                                                                                                                                                                                                                                                                   |
|----------------------------------------------------------------------------------------------------------|-------------------------------------------------------------------------------------------------------------------------------------------------------------------------------------------------------------------------------------------------------------------------------------------------------------------------------------------------------------------------------------------------------------------------------------------------------------------------------------------------------------------|
|                                                                                                          | <input type="checkbox"/> Signatures were not found<br><input type="checkbox"/> Other (please specify)                                                                                                                                                                                                                                                                                                                                                                                                             |
| <b>9. Details of the person's other type of ACP documentation (please tick all that apply)</b>           | Please specify the name(s) of the document(s) _____<br>The document(s) are in the form of (please tick all that apply):<br><input type="checkbox"/> Notes<br><input type="checkbox"/> Charts<br><input type="checkbox"/> Letters<br><input type="checkbox"/> Goals of Care with person's wishes clearly stated<br><input type="checkbox"/> Evidence or statement of family awareness of person's advance care plan (please specify) _____<br><input type="checkbox"/> Other correspondence (please specify) _____ |
|                                                                                                          | <b>Who completed the documentation?</b><br><input type="checkbox"/> Person<br><input type="checkbox"/> Doctor<br><input type="checkbox"/> Nurse<br><input type="checkbox"/> Other (please specify)                                                                                                                                                                                                                                                                                                                |
| <b>PERSON'S PREFERENCES</b>                                                                              |                                                                                                                                                                                                                                                                                                                                                                                                                                                                                                                   |
| <b>10. In the person's ACP documentation did it include documentation of their preferences for care?</b> | <input type="checkbox"/> Yes<br><input type="checkbox"/> No (If NO go to SECTION 2)<br><b>If YES, what is selected?</b><br><input type="checkbox"/> Life prolonging treatment<br><input type="checkbox"/> Life prolonging treatment with specific outcomes / or some limitations of treatment<br><input type="checkbox"/> No life prolonging treatment<br><input type="checkbox"/> Person wants to delegate decisions to another person (e.g. SDM)                                                                |

|                                                                                                                     |                                                                                                                                                                                                                                                                                                                                                                                                                                                                         |
|---------------------------------------------------------------------------------------------------------------------|-------------------------------------------------------------------------------------------------------------------------------------------------------------------------------------------------------------------------------------------------------------------------------------------------------------------------------------------------------------------------------------------------------------------------------------------------------------------------|
| <p><b>11. Other preferences (please tick all that apply)</b></p>                                                    | <p><input type="checkbox"/> Preferred place of care/location (please specify)</p> <p><input type="checkbox"/> Preferred place of death/location (please specify)</p> <p><input type="checkbox"/> Other preferences and values (please specify)</p> <p><input type="checkbox"/> None</p>                                                                                                                                                                                 |
| <b>SECTION 2. MEDICAL ORDERS</b>                                                                                    |                                                                                                                                                                                                                                                                                                                                                                                                                                                                         |
| <p><b>12. Is there a medical order?</b></p>                                                                         | <p><input type="checkbox"/> Yes</p> <p><input type="checkbox"/> No (go to SECTION 3)</p>                                                                                                                                                                                                                                                                                                                                                                                |
| <p><b>13. Does the medical order limit treatment?</b></p>                                                           | <p><input type="checkbox"/> Yes</p> <p><input type="checkbox"/> No (Please go to <b>Question 15</b>)</p>                                                                                                                                                                                                                                                                                                                                                                |
| <p><b>14. What are the limitations on the order?</b></p>                                                            | <p><b>If there is a limitation on treatment (please tick all that apply):</b></p> <p><input type="checkbox"/> Not for cardiopulmonary resuscitation (CPR)</p> <p><input type="checkbox"/> Not for intubation</p> <p><input type="checkbox"/> Not for intensive care unit (ICU)</p> <p><input type="checkbox"/> Not for hospitalisation</p> <p><input type="checkbox"/> Not for antibiotics</p> <p><input type="checkbox"/> Other limitations (please specify) _____</p> |
| <p><b>15. Does the medical order acknowledge the person's ACD/advance care plan?</b></p>                            | <p><input type="checkbox"/> Yes</p> <p><input type="checkbox"/> No</p> <p><input type="checkbox"/> Not applicable (no ACD or advance care plan)</p> <p><input type="checkbox"/> Unclear</p>                                                                                                                                                                                                                                                                             |
| <p><b>16. If there is an ACD/advance care plan, are the medical orders consistent with the person's wishes?</b></p> | <p><input type="checkbox"/> Yes</p> <p><input type="checkbox"/> No</p> <p><input type="checkbox"/> Unclear</p> <p><input type="checkbox"/> Not applicable (no ACD or advance care plan)</p>                                                                                                                                                                                                                                                                             |

|                                                                                |                                                                                                                                                                                                                                                                                |
|--------------------------------------------------------------------------------|--------------------------------------------------------------------------------------------------------------------------------------------------------------------------------------------------------------------------------------------------------------------------------|
| <b>17. Does the medical order acknowledge discussion with the person?</b>      | <input type="checkbox"/> Yes<br><input type="checkbox"/> No, not documented<br><input type="checkbox"/> No, reason for not discussing with person is documented (e.g. person not competent)                                                                                    |
| <b>18. Does the medical order acknowledge discussion with person's family?</b> | <input type="checkbox"/> Yes<br><input type="checkbox"/> No, not documented<br><input type="checkbox"/> No, reason for not discussing with family is documented (e.g. discussed with person, no family available)                                                              |
| <b>SECTION 3. PERSON'S DETAILS</b>                                             |                                                                                                                                                                                                                                                                                |
| <b>19. Age</b>                                                                 |                                                                                                                                                                                                                                                                                |
| <b>20. Sex</b>                                                                 | <input type="checkbox"/> Male<br><input type="checkbox"/> Female<br><input type="checkbox"/> Indeterminate/Intersex/Unspecified                                                                                                                                                |
| <b>21. Postcode</b>                                                            |                                                                                                                                                                                                                                                                                |
| <b>22. Country of birth</b>                                                    | <input type="checkbox"/> Australia<br><input type="checkbox"/> Other (please specify) _____<br><input type="checkbox"/> Unknown – information not available in record                                                                                                          |
| <b>23. Indigenous status</b>                                                   | <input type="checkbox"/> Aboriginal<br><input type="checkbox"/> Torres Strait Islander<br><input type="checkbox"/> Both Aboriginal and Torres Strait Islander<br><input type="checkbox"/> Neither<br><input type="checkbox"/> Not stated (information not available in record) |
| <b>24. Ethnicity</b>                                                           | <input type="checkbox"/> Available (please specify)<br><input type="checkbox"/> Unknown – information not available in record                                                                                                                                                  |

|                                                           |                                                                                                                                                                                                                                                                                                                                                                                                                                                                                                                                                                                        |                                                                             |
|-----------------------------------------------------------|----------------------------------------------------------------------------------------------------------------------------------------------------------------------------------------------------------------------------------------------------------------------------------------------------------------------------------------------------------------------------------------------------------------------------------------------------------------------------------------------------------------------------------------------------------------------------------------|-----------------------------------------------------------------------------|
| <b>25. Religion</b>                                       | <input type="checkbox"/> Available (please specify)<br><input type="checkbox"/> Unknown – information not available in record                                                                                                                                                                                                                                                                                                                                                                                                                                                          |                                                                             |
| <b>26. Language status</b>                                | <input type="checkbox"/> Speaks English<br><input type="checkbox"/> Interpreter required (please specify the language)<br><input type="checkbox"/> Unknown – information not available in record                                                                                                                                                                                                                                                                                                                                                                                       |                                                                             |
| <b>27. Date of person's admission/visit</b>               |                                                                                                                                                                                                                                                                                                                                                                                                                                                                                                                                                                                        |                                                                             |
| <b>28. Person came from</b>                               | <input type="checkbox"/> Aged care facility<br><input type="checkbox"/> Hospital<br><input type="checkbox"/> Home<br><input type="checkbox"/> Other (please specify) _____<br><input type="checkbox"/> Unknown                                                                                                                                                                                                                                                                                                                                                                         |                                                                             |
| <b>29. Medical condition (please tick all that apply)</b> | <input type="checkbox"/> Circulatory system<br><input type="checkbox"/> Respiratory system<br><input type="checkbox"/> Neurological system<br><input type="checkbox"/> Gastrointestinal system<br><input type="checkbox"/> Musculoskeletal and connective tissue<br><input type="checkbox"/> Endocrine, nutritional and metabolic disorders<br><input type="checkbox"/> Urinary/excretory and reproductive<br><input type="checkbox"/> Cancer<br><input type="checkbox"/> Mental Illness<br><input type="checkbox"/> Dementia<br><input type="checkbox"/> Other (please specify) _____ |                                                                             |
| <b>30. Is this person receiving palliative care?</b>      | <input type="checkbox"/> Yes                                                                                                                                                                                                                                                                                                                                                                                                                                                                                                                                                           | If Yes, is the palliative care from the specialist palliative care service? |

1  
2  
3  
4  
5  
6  
7  
8  
9  
10  
11  
12  
13  
14  
15  
16  
17  
18  
19  
20  
21  
22  
23  
24  
25  
26  
27  
28  
29  
30  
31  
32  
33  
34  
35  
36  
37  
38  
39  
40  
41  
42  
43  
44  
45  
46  
47

|                                                                                                                                                                                                                                                                                                 |                                                                                                                                                                                                                                                                                                                                                                                                                                                                                                                                                                                                                                                                                                                                                      |                                                                                                 |
|-------------------------------------------------------------------------------------------------------------------------------------------------------------------------------------------------------------------------------------------------------------------------------------------------|------------------------------------------------------------------------------------------------------------------------------------------------------------------------------------------------------------------------------------------------------------------------------------------------------------------------------------------------------------------------------------------------------------------------------------------------------------------------------------------------------------------------------------------------------------------------------------------------------------------------------------------------------------------------------------------------------------------------------------------------------|-------------------------------------------------------------------------------------------------|
|                                                                                                                                                                                                                                                                                                 | <input type="checkbox"/> No<br><input type="checkbox"/> Unknown                                                                                                                                                                                                                                                                                                                                                                                                                                                                                                                                                                                                                                                                                      | <input type="checkbox"/> Yes<br><input type="checkbox"/> No<br><input type="checkbox"/> Unknown |
| <b>31. Eastern Cooperative Oncology group (ECOG) performance status – this is a scale used to assess how a person’s disease is progressing and how the disease impacts the daily living abilities of the person. This information can help to determine appropriate treatment and prognosis</b> | <input type="checkbox"/> Fully active, able to carry on all pre-disease performance without restriction<br><input type="checkbox"/> Restricted in physically strenuous activity, but ambulatory and able to carry out work of a light or sedentary nature, e.g., light house work, office work<br><input type="checkbox"/> Ambulatory and capable of all selfcare but unable to carry out any work activities; up and about more than 50% of waking hours<br><input type="checkbox"/> Capable of only limited selfcare; confined to bed or chair more than 50% of waking hours<br><input type="checkbox"/> Completely disabled; cannot carry on any selfcare; totally confined to bed or chair<br><input type="checkbox"/> Information not available |                                                                                                 |

| <b>Staff member to complete</b>                                           |                                                                                                                                                                                                                                                                                                              |
|---------------------------------------------------------------------------|--------------------------------------------------------------------------------------------------------------------------------------------------------------------------------------------------------------------------------------------------------------------------------------------------------------|
| Person’s ability to participate in this survey (please choose one option) | <input type="checkbox"/> Person is able to participate<br><input type="checkbox"/> Person does not want to take part in the study<br><input type="checkbox"/> Person is unable to consent<br><input type="checkbox"/> Person does not speak English<br><input type="checkbox"/> Other (please specify) _____ |

## PERSON SURVEY

**Study ID number**

**Study site**

**Date form completed** \_\_\_\_ / \_\_\_\_ / \_\_\_\_

### Section 1: About you

|                                     |                                                                                                                                                                                                                                                    |
|-------------------------------------|----------------------------------------------------------------------------------------------------------------------------------------------------------------------------------------------------------------------------------------------------|
| 1. I am completing this survey:     | <input type="checkbox"/> On my own without help from someone else<br><input type="checkbox"/> With help from someone else (e.g. friend/relative, staff member). Please specify who _____                                                           |
| 2. I am:                            | <input type="checkbox"/> Male<br><input type="checkbox"/> Female<br><input type="checkbox"/> Other (please specify) _____                                                                                                                          |
| 3. My age is:                       |                                                                                                                                                                                                                                                    |
| 4. I was born in:                   | <input type="checkbox"/> Australia<br><input type="checkbox"/> Other country (please specify) _____                                                                                                                                                |
| 5. I am:                            | <input type="checkbox"/> Aboriginal<br><input type="checkbox"/> Torres Strait Islander<br><input type="checkbox"/> Both Aboriginal and Torres Strait Islander<br><input type="checkbox"/> Neither<br><input type="checkbox"/> Prefer not to answer |
| 6. The language I speak at home is: |                                                                                                                                                                                                                                                    |
| 7. My ethnicity is:                 |                                                                                                                                                                                                                                                    |



1  
2  
3  
4  
5  
6  
7  
8  
9  
10  
11  
12  
13  
14  
15  
16  
17  
18  
19  
20  
21  
22  
23  
24  
25  
26  
27  
28  
29  
30  
31  
32  
33  
34  
35  
36  
37  
38  
39  
40  
41  
42  
43  
44  
45  
46  
47

|                                              |                                                                                                                                                                                                                                                                                                                                             |
|----------------------------------------------|---------------------------------------------------------------------------------------------------------------------------------------------------------------------------------------------------------------------------------------------------------------------------------------------------------------------------------------------|
| 8. How important is your religion to you?    | <input type="checkbox"/> Very important<br><input type="checkbox"/> Important<br><input type="checkbox"/> Somewhat important<br><input type="checkbox"/> Not important<br><input type="checkbox"/> Prefer not to answer                                                                                                                     |
| 9. What is your current relationship status? | <input type="checkbox"/> Married/de facto/in a relationship<br><input type="checkbox"/> Single<br><input type="checkbox"/> Divorced or separated<br><input type="checkbox"/> Widowed                                                                                                                                                        |
| 10. What is your highest level of education? | <input type="checkbox"/> No formal schooling<br><input type="checkbox"/> Primary school (Highest year completed)<br><input type="checkbox"/> Secondary or High school (Highest year completed)<br><input type="checkbox"/> Trade school or Apprenticeship<br><input type="checkbox"/> Diploma<br><input type="checkbox"/> University degree |
| 11. Who do you live with?                    | <input type="checkbox"/> Husband/wife/partner<br><input type="checkbox"/> Children<br><input type="checkbox"/> Brother/sister<br><input type="checkbox"/> Other family<br><input type="checkbox"/> Friends<br><input type="checkbox"/> I live alone                                                                                         |

|                                                                                           |                                                              |
|-------------------------------------------------------------------------------------------|--------------------------------------------------------------|
| <b>Section 2: About your health</b>                                                       |                                                              |
| <i>Under each heading, please tick the ONE box that best describes your health TODAY.</i> |                                                              |
| 12. Mobility                                                                              | <input type="checkbox"/> I have no problems in walking about |

|                                                                                           |                                                                                                                                                                                                                                                                                                                                                                                    |
|-------------------------------------------------------------------------------------------|------------------------------------------------------------------------------------------------------------------------------------------------------------------------------------------------------------------------------------------------------------------------------------------------------------------------------------------------------------------------------------|
|                                                                                           | <input type="checkbox"/> I have slight problems in walking about<br><input type="checkbox"/> I have moderate problems in walking about<br><input type="checkbox"/> I have severe problems in walking about<br><input type="checkbox"/> I am unable to walk about                                                                                                                   |
| 13. Usual Activities ( <i>e.g. work, study, housework, family or leisure activities</i> ) | <input type="checkbox"/> I have no problems doing my usual activities<br><input type="checkbox"/> I have slight problems doing my usual activities<br><input type="checkbox"/> I have moderate problems doing my usual activities<br><input type="checkbox"/> I have severe problems doing my usual activities<br><input type="checkbox"/> I am unable to do my usual activities   |
| 14. Self-Care                                                                             | <input type="checkbox"/> I have no problems washing or dressing myself<br><input type="checkbox"/> I have slight problems washing or dressing myself<br><input type="checkbox"/> I have moderate problems washing or dressing myself<br><input type="checkbox"/> I have severe problems washing or dressing myself<br><input type="checkbox"/> I am unable to wash or dress myself |
| 15. Pain/discomfort                                                                       | <input type="checkbox"/> I have no pain or discomfort<br><input type="checkbox"/> I have slight pain or discomfort<br><input type="checkbox"/> I have moderate pain or discomfort<br><input type="checkbox"/> I have severe pain or discomfort<br><input type="checkbox"/> I have extreme pain or discomfort                                                                       |
| 16. Anxiety/depression                                                                    | <input type="checkbox"/> I am not anxious or depressed<br><input type="checkbox"/> I am slightly anxious or depressed<br><input type="checkbox"/> I am moderately anxious or depressed<br><input type="checkbox"/> I am severely anxious or depressed<br><input type="checkbox"/> I am extremely anxious or depressed                                                              |

### Section 3: Your understanding and experience of advance care planning

*ADVANCE CARE PLANNING is the opportunity for people to tell their family, friends and doctors ahead of time, what they would want if they became seriously ill and could no longer speak for themselves. Ideally they would talk to their family, friends and doctors. It is also a good idea to write it down.*

|                                                                                                                                             |                                                                                                                                                                                                                                                                                                                                                                                                                                                                                                                                                                                                                                                                                |
|---------------------------------------------------------------------------------------------------------------------------------------------|--------------------------------------------------------------------------------------------------------------------------------------------------------------------------------------------------------------------------------------------------------------------------------------------------------------------------------------------------------------------------------------------------------------------------------------------------------------------------------------------------------------------------------------------------------------------------------------------------------------------------------------------------------------------------------|
| <p>17. Have you ever heard about advance care planning?</p>                                                                                 | <p><input type="checkbox"/> Yes, I have heard of advance care planning</p> <p><input type="checkbox"/> Yes, I have an advance care plan or advance care directive</p> <p><input type="checkbox"/> No, I haven't heard of advance care planning before</p>                                                                                                                                                                                                                                                                                                                                                                                                                      |
| <p>18. Thinking about advance care planning in general terms, which of the following statements most closely applies to you?</p>            | <p><input type="checkbox"/> I am not interested in advance care planning</p> <p><input type="checkbox"/> I am thinking about advance care planning</p> <p><input type="checkbox"/> I am planning on doing advance care planning</p> <p><input type="checkbox"/> I have spoken to someone (e.g. my family/friends/carer/doctor) about advance care planning</p> <p><input type="checkbox"/> I have written my preferences in an advance care plan/advance care directive/other document</p> <p><input type="checkbox"/> I have written my preferences in an advance care plan / advance care directive / other document and I review my advance care plan from time to time</p> |
| <p>19. Who would you trust to make medical decisions for you if you were too unwell to do so for yourself? (please tick all that apply)</p> | <p><input type="checkbox"/> Husband/wife/ partner</p> <p><input type="checkbox"/> Children</p> <p><input type="checkbox"/> Brother/sister</p> <p><input type="checkbox"/> Other family</p> <p><input type="checkbox"/> Friend</p> <p><input type="checkbox"/> Doctor</p> <p><input type="checkbox"/> Other (please specify)</p> <p><input type="checkbox"/> I can't decide</p> <p><input type="checkbox"/> No-one</p>                                                                                                                                                                                                                                                          |

|                                                                                                                                                                     |                                                                                                                                                                                                                                                                                                                                                                                                                                                                                                                                                                                                                                                                                              |
|---------------------------------------------------------------------------------------------------------------------------------------------------------------------|----------------------------------------------------------------------------------------------------------------------------------------------------------------------------------------------------------------------------------------------------------------------------------------------------------------------------------------------------------------------------------------------------------------------------------------------------------------------------------------------------------------------------------------------------------------------------------------------------------------------------------------------------------------------------------------------|
|                                                                                                                                                                     | <input type="checkbox"/> I have not thought about that yet                                                                                                                                                                                                                                                                                                                                                                                                                                                                                                                                                                                                                                   |
| 20. What things would <b>worry you most</b> about your future? (please tick all that apply)                                                                         | <input type="checkbox"/> Not being able to look after myself<br><input type="checkbox"/> Being in pain/distressed<br><input type="checkbox"/> Not being able to get out of bed<br><input type="checkbox"/> Not being able to make decisions for myself<br><input type="checkbox"/> Relying on others<br><input type="checkbox"/> Being a burden on my family/ friends/carers<br><input type="checkbox"/> Not being able to talk to my family/ friends/carers<br><input type="checkbox"/> Being admitted to hospital<br><input type="checkbox"/> Wanting to live as long as possible<br><input type="checkbox"/> Wanting to get well<br><input type="checkbox"/> Other (please specify) _____ |
| 21. Thinking about your future, if you became really unwell or unconscious, and couldn't tell the doctors what you want, which sentence reflects best how you feel? | <input type="checkbox"/> I want to live for as long as possible<br><input type="checkbox"/> I want to live as long as possible but only if my acceptable outcomes and preferences for care are likely<br><input type="checkbox"/> I would not want any treatment that was to prolong my life, I would want to receive comfort care<br><input type="checkbox"/> I would not want to make this decision myself. The person I would want to make this decision for me is my _____                                                                                                                                                                                                               |

**Section 4: Telling others about your advance care plans**

|                                                                                                         |                                                                                                                                                                                                  |
|---------------------------------------------------------------------------------------------------------|--------------------------------------------------------------------------------------------------------------------------------------------------------------------------------------------------|
| 22. Have you ever talked to anyone about your goals, values, beliefs or your preferences about specific | <input type="checkbox"/> Yes<br><input type="checkbox"/> No (If No, go to <b>Question 24</b> )<br><input type="checkbox"/> I cannot remember (If you cannot remember, go to <b>Question 24</b> ) |
|---------------------------------------------------------------------------------------------------------|--------------------------------------------------------------------------------------------------------------------------------------------------------------------------------------------------|

1  
2  
3  
4  
5  
6  
7  
8  
9  
10  
11  
12  
13  
14  
15  
16  
17  
18  
19  
20  
21  
22  
23  
24  
25  
26  
27  
28  
29  
30  
31  
32  
33  
34  
35  
36  
37  
38  
39  
40  
41  
42  
43  
44  
45  
46  
47

|                                                                                                                                                                                                                                                              |                                                                                                                                                                                                                                                                                                                                                                                                                                            |
|--------------------------------------------------------------------------------------------------------------------------------------------------------------------------------------------------------------------------------------------------------------|--------------------------------------------------------------------------------------------------------------------------------------------------------------------------------------------------------------------------------------------------------------------------------------------------------------------------------------------------------------------------------------------------------------------------------------------|
| <p>1<br/>2<br/>3<br/>4<br/>5<br/>6<br/>7<br/>8<br/>9<br/>10<br/>11<br/>12<br/>13<br/>14<br/>15<br/>16<br/>17</p> <p>medical treatment in case you become seriously ill or unable to make your own decisions?</p>                                             | <p>If YES, who did you talk to?</p> <p><input type="checkbox"/> Husband/wife/partner</p> <p><input type="checkbox"/> Children</p> <p><input type="checkbox"/> Brother/sister</p> <p><input type="checkbox"/> Other family</p> <p><input type="checkbox"/> Friend</p> <p><input type="checkbox"/> Doctor</p> <p><input type="checkbox"/> Other (please specify) _____</p> <p><input type="checkbox"/> I have not thought about that yet</p> |
| <p>18<br/>19<br/>20<br/>21<br/>22<br/>23<br/>24<br/>25</p> <p>23. Have you ever written down your goals, values, and beliefs or your preferences about specific medical treatment in case you become seriously ill or unable to make your own decisions?</p> | <p><input type="checkbox"/> Yes</p> <p><input type="checkbox"/> No (If No go to <b>Question 25</b>)</p> <p><input type="checkbox"/> I cannot remember (If you cannot remember go to <b>Question 25</b>)</p> <p>If YES, how long ago did you do this? _____</p> <p>In what type of document did you write this? _____</p> <p>Where is this document kept? _____</p>                                                                         |
| <p>26<br/>27<br/>28<br/>29<br/>30<br/>31</p> <p>24. Have you ever signed a legal document to appoint someone to make healthcare decisions on your behalf if you were unable to make your own decisions?</p>                                                  | <p><input type="checkbox"/> Yes</p> <p><input type="checkbox"/> No (If No go to <b>Question 26</b>)</p> <p><input type="checkbox"/> I cannot remember (If you cannot remember go to <b>Question 26</b>)</p>                                                                                                                                                                                                                                |
|                                                                                                                                                                                                                                                              | <p>If YES how long ago did you sign this document? _____</p> <p>What type of document did you sign? _____</p> <p>Where is this document kept? _____</p>                                                                                                                                                                                                                                                                                    |
| <p>32<br/>33<br/>34<br/>35<br/>36<br/>37<br/>38<br/>39<br/>40<br/>41<br/>42<br/>43<br/>44<br/>45<br/>46<br/>47</p> <p>25. Any other comments regarding your experiences with advance care planning</p>                                                       |                                                                                                                                                                                                                                                                                                                                                                                                                                            |

## STROBE Statement—checklist of items that should be included in reports of observational studies

|                           | Item No | Recommendation                                                                                                                                                                                                                                                                                                                                                                                                                                                         |                  |
|---------------------------|---------|------------------------------------------------------------------------------------------------------------------------------------------------------------------------------------------------------------------------------------------------------------------------------------------------------------------------------------------------------------------------------------------------------------------------------------------------------------------------|------------------|
| <b>Title and abstract</b> | 1       | (a) Indicate the study's design with a commonly used term in the title or the abstract                                                                                                                                                                                                                                                                                                                                                                                 | YES, p.1         |
|                           |         | (b) Provide in the abstract an informative and balanced summary of what was done and what was found                                                                                                                                                                                                                                                                                                                                                                    | YES, p.3         |
| <b>Introduction</b>       |         |                                                                                                                                                                                                                                                                                                                                                                                                                                                                        |                  |
| Background/rationale      | 2       | Explain the scientific background and rationale for the investigation being reported                                                                                                                                                                                                                                                                                                                                                                                   | YES, p.5-7       |
| Objectives                | 3       | State specific objectives, including any prespecified hypotheses                                                                                                                                                                                                                                                                                                                                                                                                       | YES, p.7         |
| <b>Methods</b>            |         |                                                                                                                                                                                                                                                                                                                                                                                                                                                                        |                  |
| Study design              | 4       | Present key elements of study design early in the paper                                                                                                                                                                                                                                                                                                                                                                                                                | YES, p.8         |
| Setting                   | 5       | Describe the setting, locations, and relevant dates, including periods of recruitment, exposure, follow-up, and data collection                                                                                                                                                                                                                                                                                                                                        | YES, p.8-9       |
| Participants              | 6       | (a) <i>Cohort study</i> —Give the eligibility criteria, and the sources and methods of selection of participants. Describe methods of follow-up<br><i>Case-control study</i> —Give the eligibility criteria, and the sources and methods of case ascertainment and control selection. Give the rationale for the choice of cases and controls<br><i>Cross-sectional study</i> —Give the eligibility criteria, and the sources and methods of selection of participants | YES, p.9         |
|                           |         | (b) <i>Cohort study</i> —For matched studies, give matching criteria and number of exposed and unexposed<br><i>Case-control study</i> —For matched studies, give matching criteria and the number of controls per case                                                                                                                                                                                                                                                 | NA               |
| Variables                 | 7       | Clearly define all outcomes, exposures, predictors, potential confounders, and effect modifiers. Give diagnostic criteria, if applicable                                                                                                                                                                                                                                                                                                                               | YES, p.12        |
| Data sources/measurement  | 8*      | For each variable of interest, give sources of data and details of methods of assessment (measurement). Describe comparability of assessment methods if there is more than one group                                                                                                                                                                                                                                                                                   | YES, p.12        |
| Bias                      | 9       | Describe any efforts to address potential sources of bias                                                                                                                                                                                                                                                                                                                                                                                                              | NA (pilot study) |
| Study size                | 10      | Explain how the study size was arrived at                                                                                                                                                                                                                                                                                                                                                                                                                              | YES, p.12        |
| Quantitative variables    | 11      | Explain how quantitative variables were handled in the analyses. If applicable, describe which groupings were chosen and why                                                                                                                                                                                                                                                                                                                                           | YES, p.13-14     |
| Statistical methods       | 12      | (a) Describe all statistical methods, including those used to control for confounding                                                                                                                                                                                                                                                                                                                                                                                  | YES, p.13-14     |
|                           |         | (b) Describe any methods used to examine subgroups and interactions                                                                                                                                                                                                                                                                                                                                                                                                    | YES, p.13-14     |
|                           |         | (c) Explain how missing data were addressed                                                                                                                                                                                                                                                                                                                                                                                                                            | NA               |
|                           |         | (d) <i>Cohort study</i> —If applicable, explain how loss to follow-up was addressed<br><i>Case-control study</i> —If applicable, explain how matching of cases and controls was addressed<br><i>Cross-sectional study</i> —If applicable, describe analytical methods taking                                                                                                                                                                                           | NA               |

account of sampling strategy

(e) Describe any sensitivity analyses

## Results [NOT APPLICABLE, STUDY PROTOCOL]

|                  |     |                                                                                                                                                                                                                                                                                                                                                                                                               |
|------------------|-----|---------------------------------------------------------------------------------------------------------------------------------------------------------------------------------------------------------------------------------------------------------------------------------------------------------------------------------------------------------------------------------------------------------------|
| Participants     | 13* | (a) Report numbers of individuals at each stage of study—eg numbers potentially eligible, examined for eligibility, confirmed eligible, included in the study, completing follow-up, and analysed<br>(b) Give reasons for non-participation at each stage<br>(c) Consider use of a flow diagram                                                                                                               |
| Descriptive data | 14* | (a) Give characteristics of study participants (eg demographic, clinical, social) and information on exposures and potential confounders<br>(b) Indicate number of participants with missing data for each variable of interest<br>(c) <i>Cohort study</i> —Summarise follow-up time (eg, average and total amount)                                                                                           |
| Outcome data     | 15* | <i>Cohort study</i> —Report numbers of outcome events or summary measures over time<br><i>Case-control study</i> —Report numbers in each exposure category, or summary measures of exposure<br><i>Cross-sectional study</i> —Report numbers of outcome events or summary measures                                                                                                                             |
| Main results     | 16  | (a) Give unadjusted estimates and, if applicable, confounder-adjusted estimates and their precision (eg, 95% confidence interval). Make clear which confounders were adjusted for and why they were included<br>(b) Report category boundaries when continuous variables were categorized<br>(c) If relevant, consider translating estimates of relative risk into absolute risk for a meaningful time period |
| Other analyses   | 17  | Report other analyses done—eg analyses of subgroups and interactions, and sensitivity analyses                                                                                                                                                                                                                                                                                                                |

## Discussion

|                  |    |                                                                                                                                                                            |
|------------------|----|----------------------------------------------------------------------------------------------------------------------------------------------------------------------------|
| Key results      | 18 | Summarise key results with reference to study objectives                                                                                                                   |
| Limitations      | 19 | Discuss limitations of the study, taking into account sources of potential bias or imprecision. Discuss both direction and magnitude of any potential bias                 |
| Interpretation   | 20 | Give a cautious overall interpretation of results considering objectives, limitations, multiplicity of analyses, results from similar studies, and other relevant evidence |
| Generalisability | 21 | Discuss the generalisability (external validity) of the study results                                                                                                      |

## Other information

|         |    |                                                                                                                                                               |
|---------|----|---------------------------------------------------------------------------------------------------------------------------------------------------------------|
| Funding | 22 | Give the source of funding and the role of the funders for the present study and, if applicable, for the original study on which the present article is based |
|---------|----|---------------------------------------------------------------------------------------------------------------------------------------------------------------|

\*Give information separately for cases and controls in case-control studies and, if applicable, for exposed and unexposed groups in cohort and cross-sectional studies.

**Note:** An Explanation and Elaboration article discusses each checklist item and gives methodological background and published examples of transparent reporting. The STROBE checklist is best used in conjunction with this article (freely available on the Web sites of PLoS Medicine at <http://www.plosmedicine.org/>, Annals of Internal Medicine at <http://www.annals.org/>, and Epidemiology at <http://www.epidem.com/>). Information on the STROBE Initiative is available at [www.strobe-statement.org](http://www.strobe-statement.org).
