# Supplementary material for: Protocol for a national prevalence study of advance care planning documentation and self-reported uptake in Australia
Source: PubMed Central journal article supplement — BMJ Open. 2017 Nov 3;7(11):e018024. doi: 10.1136/bmjopen-2017-018024 (PMC5695482; doi:10.1136/bmjopen-2017-018024), 2017-11-03
Supplement: bmjopen-2017-018024supp001.pdf [file bmjopen-2017-018024supp001.pdf]

## GENERIC HEALTH RECORD REVIEW FORM

**Study ID number**

**Study site**

**Date form completed** \_\_\_ / \_\_\_ / \_\_\_

### SECTION 1. TYPE AND PLACE OF DOCUMENTATION

|                                                                                                                                                          |                                                                                                                                                                                                                                                        |                                               |
|----------------------------------------------------------------------------------------------------------------------------------------------------------|--------------------------------------------------------------------------------------------------------------------------------------------------------------------------------------------------------------------------------------------------------|-----------------------------------------------|
| <b>1. Can you find any Advance Care Planning (ACP) documentation regarding health and personal care and preferred health outcomes within 15 minutes?</b> | <input type="checkbox"/> Yes (If YES, please complete the date of most recent documentation)<br><input type="checkbox"/> No (If NO, go to Section 2)                                                                                                   | Date of most recent documentation ___/___/___ |
| <b>2. How long did it take you to find the ACP documentation?</b>                                                                                        | <input type="checkbox"/> Less than 5 minutes<br><input type="checkbox"/> 5-10 minutes<br><input type="checkbox"/> 10-15 minutes                                                                                                                        |                                               |
| <b>3. Where did you find the ACP documentation? (please tick all that apply)</b>                                                                         | <input type="checkbox"/> Paper record<br><input type="checkbox"/> Electronic record                                                                                                                                                                    |                                               |
| <b>4. In which section of the record did you find the ACP documentation? (please tick all that apply)</b>                                                | <input type="checkbox"/> Specified area for ACP documentation<br><input type="checkbox"/> Legal section<br><input type="checkbox"/> Notes section<br><input type="checkbox"/> My Health Record<br><input type="checkbox"/> Other (please specify)_____ |                                               |
| <b>5. What type of documentation did you find? (please tick all that apply)</b>                                                                          | <input type="checkbox"/> Statutory ACD - preferences for care (if YES please go to Question 6)<br><input type="checkbox"/> Statutory ACD - SDM appointed by the person (If YES, please go to Question 7)                                               |                                               |

- Interstate statutory ACD - preferences for care
  - ACT: Health Direction*
  - NT: Direction Under Natural Death Act (prior to 17/03/2014)*
  - NT: Advance Personal Plan (from 18/13/2014)*
  - QLD: Advance Health Directive*
  - SA: Anticipatory Direction (prior to 01/07/2014)*
  - SA: Advance Care Directive (from 02/07/2014)*
  - TAS: Enduring Guardian (a statutory document that contains information about preferences for care)*
  - VIC: A Refusal of Treatment Certificate (competent)*
  - VIC: A Refusal of Treatment Certificate (incompetent)*
  - WA: Advance Health Directive*
- Interstate statutory ACD - SDM appointed by the person
  - ACT: Enduring Power of Attorney (HealthCare Matters)*
  - NSW: Enduring Guardian*
  - NT: Enduring Power of Attorney (prior to 17/03/2014)*
  - NT: Decision Maker (Healthcare Matters) (from 18/13/2014)*
  - QLD: Enduring Power of Attorney (Personal Matters)*
  - SA: Medical Power of Attorney (prior to 01/07/2014)*
  - SA: Advance Care Directive – Substitute Decision Maker Appointment (from 02/07/2014)*
  - TAS: Enduring Guardian*
  - VIC: Enduring Power of Attorney Medical Treatment*
  - VIC: Enduring Power of Guardianship (prior to 31/08/15)*

|                                                                                      |                                                                                                                                                                                                                                                                                                                                                                                                                                                                                                                                                                                                                                                                                                                                                                                                                                                                                                                                                                                                                                                                                                                             |
|--------------------------------------------------------------------------------------|-----------------------------------------------------------------------------------------------------------------------------------------------------------------------------------------------------------------------------------------------------------------------------------------------------------------------------------------------------------------------------------------------------------------------------------------------------------------------------------------------------------------------------------------------------------------------------------------------------------------------------------------------------------------------------------------------------------------------------------------------------------------------------------------------------------------------------------------------------------------------------------------------------------------------------------------------------------------------------------------------------------------------------------------------------------------------------------------------------------------------------|
|                                                                                      | <input type="checkbox"/> <i>VIC: Enduring Power of Attorney (Personal Matters) (from 01/09/2015)</i><br><input type="checkbox"/> <i>WA: Enduring Guardian</i><br><input type="checkbox"/> Non-statutory or common law ACD documentation (If YES please go to Question 8)<br><input type="checkbox"/> Other documentation (If YES please go to Question 9) (please specify)                                                                                                                                                                                                                                                                                                                                                                                                                                                                                                                                                                                                                                                                                                                                                  |
| <b>6. Details of the person's statutory ACD documentation (preferences for care)</b> | <input type="checkbox"/> Yes, there is a copy in the record<br><input type="checkbox"/> No – I did not find a copy of a statutory ACD (preferences for care), but the record indicates the person has completed one.<br><input type="checkbox"/> No document or notes (regarding the existence of it) located in the record<br><b>If YES, please specify the name of the document</b><br><b>Was the document signed</b><br><input type="checkbox"/> Yes<br><input type="checkbox"/> No (Please proceed to the next question)<br><b>Who signed the document? (please tick all that apply)</b><br><input type="checkbox"/> Person<br><input type="checkbox"/> Doctor<br><input type="checkbox"/> Legal practitioner<br><input type="checkbox"/> Justice of Peace<br><input type="checkbox"/> SDM appointed by the person<br><input type="checkbox"/> Unable to determine<br><input type="checkbox"/> Signatures were not found<br><input type="checkbox"/> Other (please specify)<br><input type="checkbox"/> Not Applicable<br><b>Is the document signed in accordance with legislation?</b><br><input type="checkbox"/> Yes |

|                                                                                    |                                                                                                                                                                                                                                                                                                                                                                                                     |
|------------------------------------------------------------------------------------|-----------------------------------------------------------------------------------------------------------------------------------------------------------------------------------------------------------------------------------------------------------------------------------------------------------------------------------------------------------------------------------------------------|
|                                                                                    | <input type="checkbox"/> No<br><input type="checkbox"/> I don't know                                                                                                                                                                                                                                                                                                                                |
| <b>7. Details of the person's statutory ACD<br/> – SDM appointed by the person</b> | <input type="checkbox"/> Yes, there is a copy in the record<br><input type="checkbox"/> No - did not find a copy of the statutory ACD (SDM appointed by the person), but the record indicates the person has completed one.<br><input type="checkbox"/> No document or notes (regarding the existence of it) located in the record                                                                  |
|                                                                                    | <b>If YES, please specify the name of the document</b>                                                                                                                                                                                                                                                                                                                                              |
|                                                                                    | <b>What is the relationship of the substitute decision maker to the person? (Please tick all that apply)</b><br><input type="checkbox"/> Spouse/partner<br><input type="checkbox"/> Child<br><input type="checkbox"/> Sibling<br><input type="checkbox"/> Other family<br><input type="checkbox"/> Friend<br><input type="checkbox"/> Other (please specify)<br><input type="checkbox"/> Not stated |
|                                                                                    | <b>Was the document signed?</b><br><input type="checkbox"/> Yes<br><input type="checkbox"/> No (Please proceed to the next question)                                                                                                                                                                                                                                                                |
|                                                                                    | <b>Who signed the document? (please tick all that apply)</b><br><input type="checkbox"/> Person<br><input type="checkbox"/> Doctor<br><input type="checkbox"/> Legal practitioner<br><input type="checkbox"/> Justice of Peace                                                                                                                                                                      |

|                                                                   |                                                                                                                                                                                                                                                                                                                                     |
|-------------------------------------------------------------------|-------------------------------------------------------------------------------------------------------------------------------------------------------------------------------------------------------------------------------------------------------------------------------------------------------------------------------------|
|                                                                   | <input type="checkbox"/> Appointed decision maker<br><input type="checkbox"/> Unable to determine<br><input type="checkbox"/> Signatures were not found<br><input type="checkbox"/> Other (please specify)                                                                                                                          |
|                                                                   | <input type="checkbox"/> Not Applicable                                                                                                                                                                                                                                                                                             |
|                                                                   | <b>Is the document signed in accordance with legislation?</b><br><input type="checkbox"/> Yes<br><input type="checkbox"/> No<br><input type="checkbox"/> I don't know                                                                                                                                                               |
| <b>8. Details of the person's non-statutory ACD documentation</b> | <input type="checkbox"/> Yes, there is a copy<br><input type="checkbox"/> No – I did not find a copy of a non-statutory ACD but the record indicates the person has completed one.<br><input type="checkbox"/> No document or notes (regarding the existence of it) located in the record                                           |
|                                                                   | <b>If YES, please specify the name of the document</b>                                                                                                                                                                                                                                                                              |
|                                                                   | <b>Was the document signed?</b><br><input type="checkbox"/> Yes<br><input type="checkbox"/> No (Please proceed to the next question)                                                                                                                                                                                                |
|                                                                   | <b>Who signed the document? (Please tick all that apply)</b><br><input type="checkbox"/> Person<br><input type="checkbox"/> Doctor<br><input type="checkbox"/> Legal practitioner<br><input type="checkbox"/> Justice of Peace<br><input type="checkbox"/> Appointed decision-maker<br><input type="checkbox"/> Unable to determine |

|                                                                                                          |                                                                                                                                                                                                                                                                                                                                                                                                                                                          |
|----------------------------------------------------------------------------------------------------------|----------------------------------------------------------------------------------------------------------------------------------------------------------------------------------------------------------------------------------------------------------------------------------------------------------------------------------------------------------------------------------------------------------------------------------------------------------|
|                                                                                                          | <input type="checkbox"/> Signatures were not found<br><input type="checkbox"/> Other (please specify)                                                                                                                                                                                                                                                                                                                                                    |
| <b>9. Details of the person's other type of ACP documentation (please tick all that apply)</b>           | Please specify the name(s) of the document(s)_____                                                                                                                                                                                                                                                                                                                                                                                                       |
|                                                                                                          | The document(s) are in the form of (please tick all that apply):<br><input type="checkbox"/> Notes<br><input type="checkbox"/> Charts<br><input type="checkbox"/> Letters<br><input type="checkbox"/> Goals of Care with person's wishes clearly stated<br><input type="checkbox"/> Evidence or statement of family awareness of person's advance care plan (please specify)_____<br><input type="checkbox"/> Other correspondence (please specify)_____ |
|                                                                                                          | <b>Who completed the documentation?</b><br><input type="checkbox"/> Person<br><input type="checkbox"/> Doctor<br><input type="checkbox"/> Nurse<br><input type="checkbox"/> Other (please specify)                                                                                                                                                                                                                                                       |
| <b>PERSON'S PREFERENCES</b>                                                                              |                                                                                                                                                                                                                                                                                                                                                                                                                                                          |
| <b>10. In the person's ACP documentation did it include documentation of their preferences for care?</b> | <input type="checkbox"/> Yes<br><input type="checkbox"/> No (If NO go to SECTION 2)                                                                                                                                                                                                                                                                                                                                                                      |
|                                                                                                          | <b>If YES, what is selected?</b><br><input type="checkbox"/> Life prolonging treatment<br><input type="checkbox"/> Life prolonging treatment with specific outcomes / or some limitations of treatment<br><input type="checkbox"/> No life prolonging treatment<br><input type="checkbox"/> Person wants to delegate decisions to another person (e.g. SDM)                                                                                              |

|                                                                                                              |                                                                                                                                                                                                                                                                                                                                                                                                                                         |
|--------------------------------------------------------------------------------------------------------------|-----------------------------------------------------------------------------------------------------------------------------------------------------------------------------------------------------------------------------------------------------------------------------------------------------------------------------------------------------------------------------------------------------------------------------------------|
| <b>11. Other preferences (please tick all that apply)</b>                                                    | <input type="checkbox"/> Preferred place of care/location (please specify)<br><input type="checkbox"/> Preferred place of death/location (please specify)<br><input type="checkbox"/> Other preferences and values (please specify)<br><input type="checkbox"/> None                                                                                                                                                                    |
| <b>SECTION 2. MEDICAL ORDERS</b>                                                                             |                                                                                                                                                                                                                                                                                                                                                                                                                                         |
| <b>12. Is there a medical order?</b>                                                                         | <input type="checkbox"/> Yes<br><input type="checkbox"/> No (go to SECTION 3)                                                                                                                                                                                                                                                                                                                                                           |
| <b>13. Does the medical order limit treatment?</b>                                                           | <input type="checkbox"/> Yes<br><input type="checkbox"/> No (Please go to <b>Question 15</b> )                                                                                                                                                                                                                                                                                                                                          |
| <b>14. What are the limitations on the order?</b>                                                            | <b>If there is a limitation on treatment (please tick all that apply):</b><br><input type="checkbox"/> Not for cardiopulmonary resuscitation (CPR)<br><input type="checkbox"/> Not for intubation<br><input type="checkbox"/> Not for intensive care unit (ICU)<br><input type="checkbox"/> Not for hospitalisation<br><input type="checkbox"/> Not for antibiotics<br><input type="checkbox"/> Other limitations (please specify)_____ |
| <b>15. Does the medical order acknowledge the person's ACD/advance care plan?</b>                            | <input type="checkbox"/> Yes<br><input type="checkbox"/> No<br><input type="checkbox"/> Not applicable (no ACD or advance care plan)<br><input type="checkbox"/> Unclear                                                                                                                                                                                                                                                                |
| <b>16. If there is an ACD/advance care plan, are the medical orders consistent with the person's wishes?</b> | <input type="checkbox"/> Yes<br><input type="checkbox"/> No<br><input type="checkbox"/> Unclear<br><input type="checkbox"/> Not applicable (no ACD or advance care plan)                                                                                                                                                                                                                                                                |

|                                                                                |                                                                                                                                                                                                                                                                                |
|--------------------------------------------------------------------------------|--------------------------------------------------------------------------------------------------------------------------------------------------------------------------------------------------------------------------------------------------------------------------------|
| <b>17. Does the medical order acknowledge discussion with the person?</b>      | <input type="checkbox"/> Yes<br><input type="checkbox"/> No, not documented<br><input type="checkbox"/> No, reason for not discussing with person is documented (e.g. person not competent)                                                                                    |
| <b>18. Does the medical order acknowledge discussion with person's family?</b> | <input type="checkbox"/> Yes<br><input type="checkbox"/> No, not documented<br><input type="checkbox"/> No, reason for not discussing with family is documented (e.g. discussed with person, no family available)                                                              |
| <b>SECTION 3. PERSON'S DETAILS</b>                                             |                                                                                                                                                                                                                                                                                |
| <b>19. Age</b>                                                                 |                                                                                                                                                                                                                                                                                |
| <b>20. Sex</b>                                                                 | <input type="checkbox"/> Male<br><input type="checkbox"/> Female<br><input type="checkbox"/> Indeterminate/Intersex/Unspecified                                                                                                                                                |
| <b>21. Postcode</b>                                                            |                                                                                                                                                                                                                                                                                |
| <b>22. Country of birth</b>                                                    | <input type="checkbox"/> Australia<br><input type="checkbox"/> Other (please specify) _____<br><input type="checkbox"/> Unknown – information not available in record                                                                                                          |
| <b>23. Indigenous status</b>                                                   | <input type="checkbox"/> Aboriginal<br><input type="checkbox"/> Torres Strait Islander<br><input type="checkbox"/> Both Aboriginal and Torres Strait Islander<br><input type="checkbox"/> Neither<br><input type="checkbox"/> Not stated (information not available in record) |
| <b>24. Ethnicity</b>                                                           | <input type="checkbox"/> Available (please specify)<br><input type="checkbox"/> Unknown – information not available in record                                                                                                                                                  |



|                                                           |                                                                                                                                                                                                                                                                                                                                                                                                                                                                                                                                                                                        |                                                                             |
|-----------------------------------------------------------|----------------------------------------------------------------------------------------------------------------------------------------------------------------------------------------------------------------------------------------------------------------------------------------------------------------------------------------------------------------------------------------------------------------------------------------------------------------------------------------------------------------------------------------------------------------------------------------|-----------------------------------------------------------------------------|
| <b>25. Religion</b>                                       | <input type="checkbox"/> Available (please specify)<br><input type="checkbox"/> Unknown – information not available in record                                                                                                                                                                                                                                                                                                                                                                                                                                                          |                                                                             |
| <b>26. Language status</b>                                | <input type="checkbox"/> Speaks English<br><input type="checkbox"/> Interpreter required (please specify the language)<br><input type="checkbox"/> Unknown – information not available in record                                                                                                                                                                                                                                                                                                                                                                                       |                                                                             |
| <b>27. Date of person's admission/visit</b>               |                                                                                                                                                                                                                                                                                                                                                                                                                                                                                                                                                                                        |                                                                             |
| <b>28. Person came from</b>                               | <input type="checkbox"/> Aged care facility<br><input type="checkbox"/> Hospital<br><input type="checkbox"/> Home<br><input type="checkbox"/> Other (please specify) _____<br><input type="checkbox"/> Unknown                                                                                                                                                                                                                                                                                                                                                                         |                                                                             |
| <b>29. Medical condition (please tick all that apply)</b> | <input type="checkbox"/> Circulatory system<br><input type="checkbox"/> Respiratory system<br><input type="checkbox"/> Neurological system<br><input type="checkbox"/> Gastrointestinal system<br><input type="checkbox"/> Musculoskeletal and connective tissue<br><input type="checkbox"/> Endocrine, nutritional and metabolic disorders<br><input type="checkbox"/> Urinary/excretory and reproductive<br><input type="checkbox"/> Cancer<br><input type="checkbox"/> Mental Illness<br><input type="checkbox"/> Dementia<br><input type="checkbox"/> Other (please specify) _____ |                                                                             |
| <b>30. Is this person receiving palliative care?</b>      | <input type="checkbox"/> Yes                                                                                                                                                                                                                                                                                                                                                                                                                                                                                                                                                           | If Yes, is the palliative care from the specialist palliative care service? |

|                                                                                                                                                                                                                                                                                                 |                                                                                                                                                                                                                                                                                                                                                                                                                                                                                                                                                                                                                                                                                                                                                      |                                                                                                 |
|-------------------------------------------------------------------------------------------------------------------------------------------------------------------------------------------------------------------------------------------------------------------------------------------------|------------------------------------------------------------------------------------------------------------------------------------------------------------------------------------------------------------------------------------------------------------------------------------------------------------------------------------------------------------------------------------------------------------------------------------------------------------------------------------------------------------------------------------------------------------------------------------------------------------------------------------------------------------------------------------------------------------------------------------------------------|-------------------------------------------------------------------------------------------------|
|                                                                                                                                                                                                                                                                                                 | <input type="checkbox"/> No<br><input type="checkbox"/> Unknown                                                                                                                                                                                                                                                                                                                                                                                                                                                                                                                                                                                                                                                                                      | <input type="checkbox"/> Yes<br><input type="checkbox"/> No<br><input type="checkbox"/> Unknown |
| <b>31. Eastern Cooperative Oncology group (ECOG) performance status – this is a scale used to assess how a person’s disease is progressing and how the disease impacts the daily living abilities of the person. This information can help to determine appropriate treatment and prognosis</b> | <input type="checkbox"/> Fully active, able to carry on all pre-disease performance without restriction<br><input type="checkbox"/> Restricted in physically strenuous activity, but ambulatory and able to carry out work of a light or sedentary nature, e.g., light house work, office work<br><input type="checkbox"/> Ambulatory and capable of all selfcare but unable to carry out any work activities; up and about more than 50% of waking hours<br><input type="checkbox"/> Capable of only limited selfcare; confined to bed or chair more than 50% of waking hours<br><input type="checkbox"/> Completely disabled; cannot carry on any selfcare; totally confined to bed or chair<br><input type="checkbox"/> Information not available |                                                                                                 |

| <b>Staff member to complete</b>                                              |                                                                                                                                                                                                                                                                                                              |
|------------------------------------------------------------------------------|--------------------------------------------------------------------------------------------------------------------------------------------------------------------------------------------------------------------------------------------------------------------------------------------------------------|
| Person’s ability to participate in this survey<br>(please choose one option) | <input type="checkbox"/> Person is able to participate<br><input type="checkbox"/> Person does not want to take part in the study<br><input type="checkbox"/> Person is unable to consent<br><input type="checkbox"/> Person does not speak English<br><input type="checkbox"/> Other (please specify) _____ |
