# Supplementary material for: Protocol for a national prevalence study of advance care planning documentation and self-reported uptake in Australia
Source: PubMed Central journal article supplement — BMJ Open. 2017 Nov 3;7(11):e018024. doi: 10.1136/bmjopen-2017-018024 (PMC5695482; doi:10.1136/bmjopen-2017-018024), 2017-11-03
Supplement: bmjopen-2017-018024supp002.pdf [file bmjopen-2017-018024supp002.pdf]

## PERSON SURVEY

**Study ID number**

**Study site**

**Date form completed** \_\_\_ / \_\_\_ / \_\_\_

### Section 1: About you

|                                     |                                                                                                                                                                                                                                                    |
|-------------------------------------|----------------------------------------------------------------------------------------------------------------------------------------------------------------------------------------------------------------------------------------------------|
| 1. I am completing this survey:     | <input type="checkbox"/> On my own without help from someone else<br><input type="checkbox"/> With help from someone else (e.g. friend/relative, staff member). Please specify who _____                                                           |
| 2. I am:                            | <input type="checkbox"/> Male<br><input type="checkbox"/> Female<br><input type="checkbox"/> Other (please specify) _____                                                                                                                          |
| 3. My age is:                       |                                                                                                                                                                                                                                                    |
| 4. I was born in:                   | <input type="checkbox"/> Australia<br><input type="checkbox"/> Other country (please specify) _____                                                                                                                                                |
| 5. I am:                            | <input type="checkbox"/> Aboriginal<br><input type="checkbox"/> Torres Strait Islander<br><input type="checkbox"/> Both Aboriginal and Torres Strait Islander<br><input type="checkbox"/> Neither<br><input type="checkbox"/> Prefer not to answer |
| 6. The language I speak at home is: |                                                                                                                                                                                                                                                    |
| 7. My ethnicity is:                 |                                                                                                                                                                                                                                                    |

|                                              |                                                                                                                                                                                                                                                                                                                                             |
|----------------------------------------------|---------------------------------------------------------------------------------------------------------------------------------------------------------------------------------------------------------------------------------------------------------------------------------------------------------------------------------------------|
| 8. How important is your religion to you?    | <input type="checkbox"/> Very important<br><input type="checkbox"/> Important<br><input type="checkbox"/> Somewhat important<br><input type="checkbox"/> Not important<br><input type="checkbox"/> Prefer not to answer                                                                                                                     |
| 9. What is your current relationship status? | <input type="checkbox"/> Married/de facto/in a relationship<br><input type="checkbox"/> Single<br><input type="checkbox"/> Divorced or separated<br><input type="checkbox"/> Widowed                                                                                                                                                        |
| 10. What is your highest level of education? | <input type="checkbox"/> No formal schooling<br><input type="checkbox"/> Primary school (Highest year completed)<br><input type="checkbox"/> Secondary or High school (Highest year completed)<br><input type="checkbox"/> Trade school or Apprenticeship<br><input type="checkbox"/> Diploma<br><input type="checkbox"/> University degree |
| 11. Who do you live with?                    | <input type="checkbox"/> Husband/wife/partner<br><input type="checkbox"/> Children<br><input type="checkbox"/> Brother/sister<br><input type="checkbox"/> Other family<br><input type="checkbox"/> Friends<br><input type="checkbox"/> I live alone                                                                                         |

## Section 2: About your health

*Under each heading, please tick the ONE box that best describes your health TODAY.*

|              |                                                              |
|--------------|--------------------------------------------------------------|
| 12. Mobility | <input type="checkbox"/> I have no problems in walking about |
|--------------|--------------------------------------------------------------|

|                                                                                           |                                                                                                                                                                                                                                                                                                                                                                                    |
|-------------------------------------------------------------------------------------------|------------------------------------------------------------------------------------------------------------------------------------------------------------------------------------------------------------------------------------------------------------------------------------------------------------------------------------------------------------------------------------|
|                                                                                           | <input type="checkbox"/> I have slight problems in walking about<br><input type="checkbox"/> I have moderate problems in walking about<br><input type="checkbox"/> I have severe problems in walking about<br><input type="checkbox"/> I am unable to walk about                                                                                                                   |
| 13. Usual Activities ( <i>e.g. work, study, housework, family or leisure activities</i> ) | <input type="checkbox"/> I have no problems doing my usual activities<br><input type="checkbox"/> I have slight problems doing my usual activities<br><input type="checkbox"/> I have moderate problems doing my usual activities<br><input type="checkbox"/> I have severe problems doing my usual activities<br><input type="checkbox"/> I am unable to do my usual activities   |
| 14. Self-Care                                                                             | <input type="checkbox"/> I have no problems washing or dressing myself<br><input type="checkbox"/> I have slight problems washing or dressing myself<br><input type="checkbox"/> I have moderate problems washing or dressing myself<br><input type="checkbox"/> I have severe problems washing or dressing myself<br><input type="checkbox"/> I am unable to wash or dress myself |
| 15. Pain/discomfort                                                                       | <input type="checkbox"/> I have no pain or discomfort<br><input type="checkbox"/> I have slight pain or discomfort<br><input type="checkbox"/> I have moderate pain or discomfort<br><input type="checkbox"/> I have severe pain or discomfort<br><input type="checkbox"/> I have extreme pain or discomfort                                                                       |
| 16. Anxiety/depression                                                                    | <input type="checkbox"/> I am not anxious or depressed<br><input type="checkbox"/> I am slightly anxious or depressed<br><input type="checkbox"/> I am moderately anxious or depressed<br><input type="checkbox"/> I am severely anxious or depressed<br><input type="checkbox"/> I am extremely anxious or depressed                                                              |

### Section 3: Your understanding and experience of advance care planning

*ADVANCE CARE PLANNING is the opportunity for people to tell their family, friends and doctors ahead of time, what they would want if they became seriously ill and could no longer speak for themselves. Ideally they would talk to their family, friends and doctors. It is also a good idea to write it down.*

|                                                                                                                                      |                                                                                                                                                                                                                                                                                                                                                                                                                                                                                                                                                                                                                                                     |
|--------------------------------------------------------------------------------------------------------------------------------------|-----------------------------------------------------------------------------------------------------------------------------------------------------------------------------------------------------------------------------------------------------------------------------------------------------------------------------------------------------------------------------------------------------------------------------------------------------------------------------------------------------------------------------------------------------------------------------------------------------------------------------------------------------|
| 17. Have you ever heard about advance care planning?                                                                                 | <input type="checkbox"/> Yes, I have heard of advance care planning<br><input type="checkbox"/> Yes, I have an advance care plan or advance care directive<br><input type="checkbox"/> No, I haven't heard of advance care planning before                                                                                                                                                                                                                                                                                                                                                                                                          |
| 18. Thinking about advance care planning in general terms, which of the following statements most closely applies to you?            | <input type="checkbox"/> I am not interested in advance care planning<br><input type="checkbox"/> I am thinking about advance care planning<br><input type="checkbox"/> I am planning on doing advance care planning<br><input type="checkbox"/> I have spoken to someone (e.g. my family/friends/carer/doctor) about advance care planning<br><input type="checkbox"/> I have written my preferences in an advance care plan/advance care directive/other document<br><input type="checkbox"/> I have written my preferences in an advance care plan / advance care directive / other document and I review my advance care plan from time to time |
| 19. Who would you trust to make medical decisions for you if you were too unwell to do so for yourself? (please tick all that apply) | <input type="checkbox"/> Husband/wife/ partner<br><input type="checkbox"/> Children<br><input type="checkbox"/> Brother/sister<br><input type="checkbox"/> Other family<br><input type="checkbox"/> Friend<br><input type="checkbox"/> Doctor<br><input type="checkbox"/> Other (please specify)<br><input type="checkbox"/> I can't decide<br><input type="checkbox"/> No-one                                                                                                                                                                                                                                                                      |

|                                                                                                                                                                     |                                                                                                                                                                                                                                                                                                                                                                                                                                                                                                                                                                                                                                                                                              |
|---------------------------------------------------------------------------------------------------------------------------------------------------------------------|----------------------------------------------------------------------------------------------------------------------------------------------------------------------------------------------------------------------------------------------------------------------------------------------------------------------------------------------------------------------------------------------------------------------------------------------------------------------------------------------------------------------------------------------------------------------------------------------------------------------------------------------------------------------------------------------|
|                                                                                                                                                                     | <input type="checkbox"/> I have not thought about that yet                                                                                                                                                                                                                                                                                                                                                                                                                                                                                                                                                                                                                                   |
| 20. What things would <b>worry you most</b> about your future? (please tick all that apply)                                                                         | <input type="checkbox"/> Not being able to look after myself<br><input type="checkbox"/> Being in pain/distressed<br><input type="checkbox"/> Not being able to get out of bed<br><input type="checkbox"/> Not being able to make decisions for myself<br><input type="checkbox"/> Relying on others<br><input type="checkbox"/> Being a burden on my family/ friends/carers<br><input type="checkbox"/> Not being able to talk to my family/ friends/carers<br><input type="checkbox"/> Being admitted to hospital<br><input type="checkbox"/> Wanting to live as long as possible<br><input type="checkbox"/> Wanting to get well<br><input type="checkbox"/> Other (please specify) _____ |
| 21. Thinking about your future, if you became really unwell or unconscious, and couldn't tell the doctors what you want, which sentence reflects best how you feel? | <input type="checkbox"/> I want to live for as long as possible<br><input type="checkbox"/> I want to live as long as possible but only if my acceptable outcomes and preferences for care are likely<br><input type="checkbox"/> I would not want any treatment that was to prolong my life, I would want to receive comfort care<br><input type="checkbox"/> I would not want to make this decision myself. The person I would want to make this decision for me is my _____                                                                                                                                                                                                               |

#### Section 4: Telling others about your advance care plans

|                                                                                                         |                                                                                                                                                                                                  |
|---------------------------------------------------------------------------------------------------------|--------------------------------------------------------------------------------------------------------------------------------------------------------------------------------------------------|
| 22. Have you ever talked to anyone about your goals, values, beliefs or your preferences about specific | <input type="checkbox"/> Yes<br><input type="checkbox"/> No (If No, go to <b>Question 24</b> )<br><input type="checkbox"/> I cannot remember (If you cannot remember, go to <b>Question 24</b> ) |
|---------------------------------------------------------------------------------------------------------|--------------------------------------------------------------------------------------------------------------------------------------------------------------------------------------------------|

|                                                                                                                                                                                                   |                                                                                                                                                                                                                                                                                                                                                                                                                                            |
|---------------------------------------------------------------------------------------------------------------------------------------------------------------------------------------------------|--------------------------------------------------------------------------------------------------------------------------------------------------------------------------------------------------------------------------------------------------------------------------------------------------------------------------------------------------------------------------------------------------------------------------------------------|
| <p>medical treatment in case you become seriously ill or unable to make your own decisions?</p>                                                                                                   | <p>If YES, who did you talk to?</p> <p><input type="checkbox"/> Husband/wife/partner</p> <p><input type="checkbox"/> Children</p> <p><input type="checkbox"/> Brother/sister</p> <p><input type="checkbox"/> Other family</p> <p><input type="checkbox"/> Friend</p> <p><input type="checkbox"/> Doctor</p> <p><input type="checkbox"/> Other (please specify) _____</p> <p><input type="checkbox"/> I have not thought about that yet</p> |
| <p>23. Have you ever written down your goals, values, and beliefs or your preferences about specific medical treatment in case you become seriously ill or unable to make your own decisions?</p> | <p><input type="checkbox"/> Yes</p> <p><input type="checkbox"/> No (If No go to <b>Question 25</b>)</p> <p><input type="checkbox"/> I cannot remember (If you cannot remember go to <b>Question 25</b>)</p> <p>If YES, how long ago did you do this? _____</p> <p>In what type of document did you write this? _____</p> <p>Where is this document kept? _____</p>                                                                         |
| <p>24. Have you ever signed a legal document to appoint someone to make healthcare decisions on your behalf if you were unable to make your own decisions?</p>                                    | <p><input type="checkbox"/> Yes</p> <p><input type="checkbox"/> No (If No go to <b>Question 26</b>)</p> <p><input type="checkbox"/> I cannot remember (If you cannot remember go to <b>Question 26</b>)</p>                                                                                                                                                                                                                                |
|                                                                                                                                                                                                   | <p>If YES how long ago did you sign this document? _____</p> <p>What type of document did you sign? _____</p> <p>Where is this document kept? _____</p>                                                                                                                                                                                                                                                                                    |
| <p>25. Any other comments regarding your experiences with advance care planning</p>                                                                                                               |                                                                                                                                                                                                                                                                                                                                                                                                                                            |
